# Supplementary material for: Oxidative [3+2]Cycloaddition of Alkynylphosphonates with Heterocyclic N-Imines: Synthesis of Pyrazolo[1,5-a]Pyridine-3-phosphonates
Source: MDPI journal article supplement (doi:10.3390/molecules27227913), 2022-11-16

# Supporting information

## **Oxidative [3+2]cycloaddition of alkynylphosphonates to heterocyclic *N*-imines: synthesis of pyrazolo[1,5-*a*]pyridine-3-phosphonates**

Igor R. Philippov<sup>1</sup>, Yuriy V. Gatilov<sup>1</sup>, Alina A. Sonina<sup>1</sup>, Aleksey Yu. Vorob'ev<sup>1,2\*</sup>

<sup>1</sup>Novosibirsk Institute of Organic Chemistry SB RAS, 630090, Novosibirsk, Russian Federation,  
9 Lavrentiev avenue

<sup>2</sup>Novosibirsk State University, 630090, Novosibirsk, Russian Federation, 1 Pirogova street

e-mail: vor@nioch.nsc.ru

### **Table of content:**

|                               |           |
|-------------------------------|-----------|
| <b>Crystallographic data</b>  | <b>S2</b> |
| <b>Copies of NMR spectra.</b> | <b>S3</b> |

### Crystallographic data

**Crystallographic data for diethyl (2,7-diphenylpyrazolo[1,5-a]pyridin-3-yl)phosphonate (3d).** Formula  $C_{23}H_{19}N_2O_3P$  (without solvent),  $M = 402.37$ , triclinic, space group  $P-1$ ,  $a = 7.7535(4)$ ,  $b = 10.9029(7)$ ,  $c = 14.0556(9)$  Å,  $\alpha = 94.892(3)$ ,  $\beta = 97.428(3)$ ,  $\gamma = 103.153(3)^\circ$ ,  $V = 1139.19(12)$  Å<sup>3</sup>,  $Z = 2$ ,  $D_{\text{calc}} = 1.173$  g·cm<sup>-3</sup>,  $\mu = 0.144$  mm<sup>-1</sup>, min/max transmission = 0.8816/0.9391,  $\theta_{\text{max}} = 26.1^\circ$ , measured 21669, unique 4514 ( $R_{\text{int}} = 0.0467$ ), observed [ $I_o > 2\sigma(I)$ ] 3004 reflections,  $R_1 = 0.0481$  ( $I_o$ ),  $wR_2 = 0.1339$  (all), Gof = 1.023,  $\Delta\rho_{\text{max}} = 0.32$ ,  $\Delta\rho_{\text{min}} = -0.31$  e·Å<sup>-3</sup>. CCDC 2001188.

**Crystallographic data for diethyl (2-phenoxy[1,5-a]pyridin-3-yl)phosphonate (5u).** Formula  $C_{17}H_{19}N_2O_4P$ ,  $M = 346.31$ , monoclinic space group  $P2_1/n$ ,  $a = 9.9416(5)$ ,  $b = 12.9865(5)$ ,  $c = 13.7882(8)$  Å,  $\beta = 92.659(2)$ ,  $V = 1778.23(15)$  Å<sup>3</sup>,  $Z = 4$ ,  $D_{\text{calc}} = 1.294$  g·cm<sup>-3</sup>,  $\mu = 0.177$  mm<sup>-1</sup>, min/max transmission = 0.756/0.801,  $\theta_{\text{max}} = 27.2^\circ$ , measured 23274, unique 3933 ( $R_{\text{int}} = 0.047$ ), observed [ $I_o > 2\sigma(I)$ ] 3185 reflections,  $R_1 = 0.071$  ( $I_o$ ),  $wR_2 = 0.211$  (all), Gof = 1.05,  $\Delta\rho_{\text{max}} = 0.51$ ,  $\Delta\rho_{\text{min}} = -0.50$  e·Å<sup>-3</sup>. CCDC 2122366.

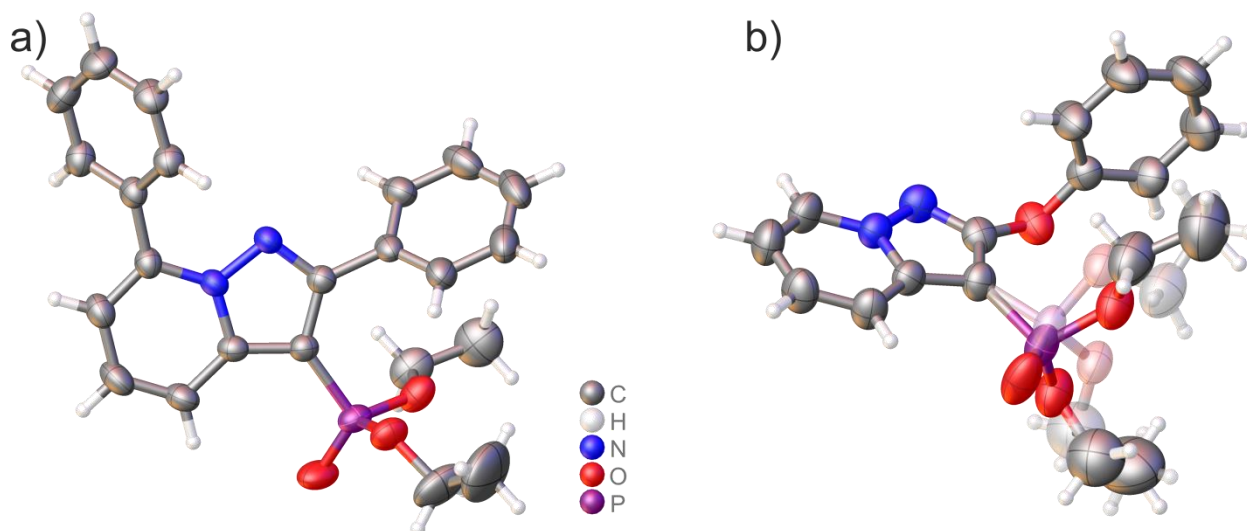

**Figure S1.** Crystal structures of pyrazolopyridines **3d** (A) and **5u** (B)

Copies of NMR spectra.

Diethyl (2-phenylpyrazolo[1,5-*a*]pyridin-3-yl)phosphonate (3a) <sup>1</sup>H NMR.

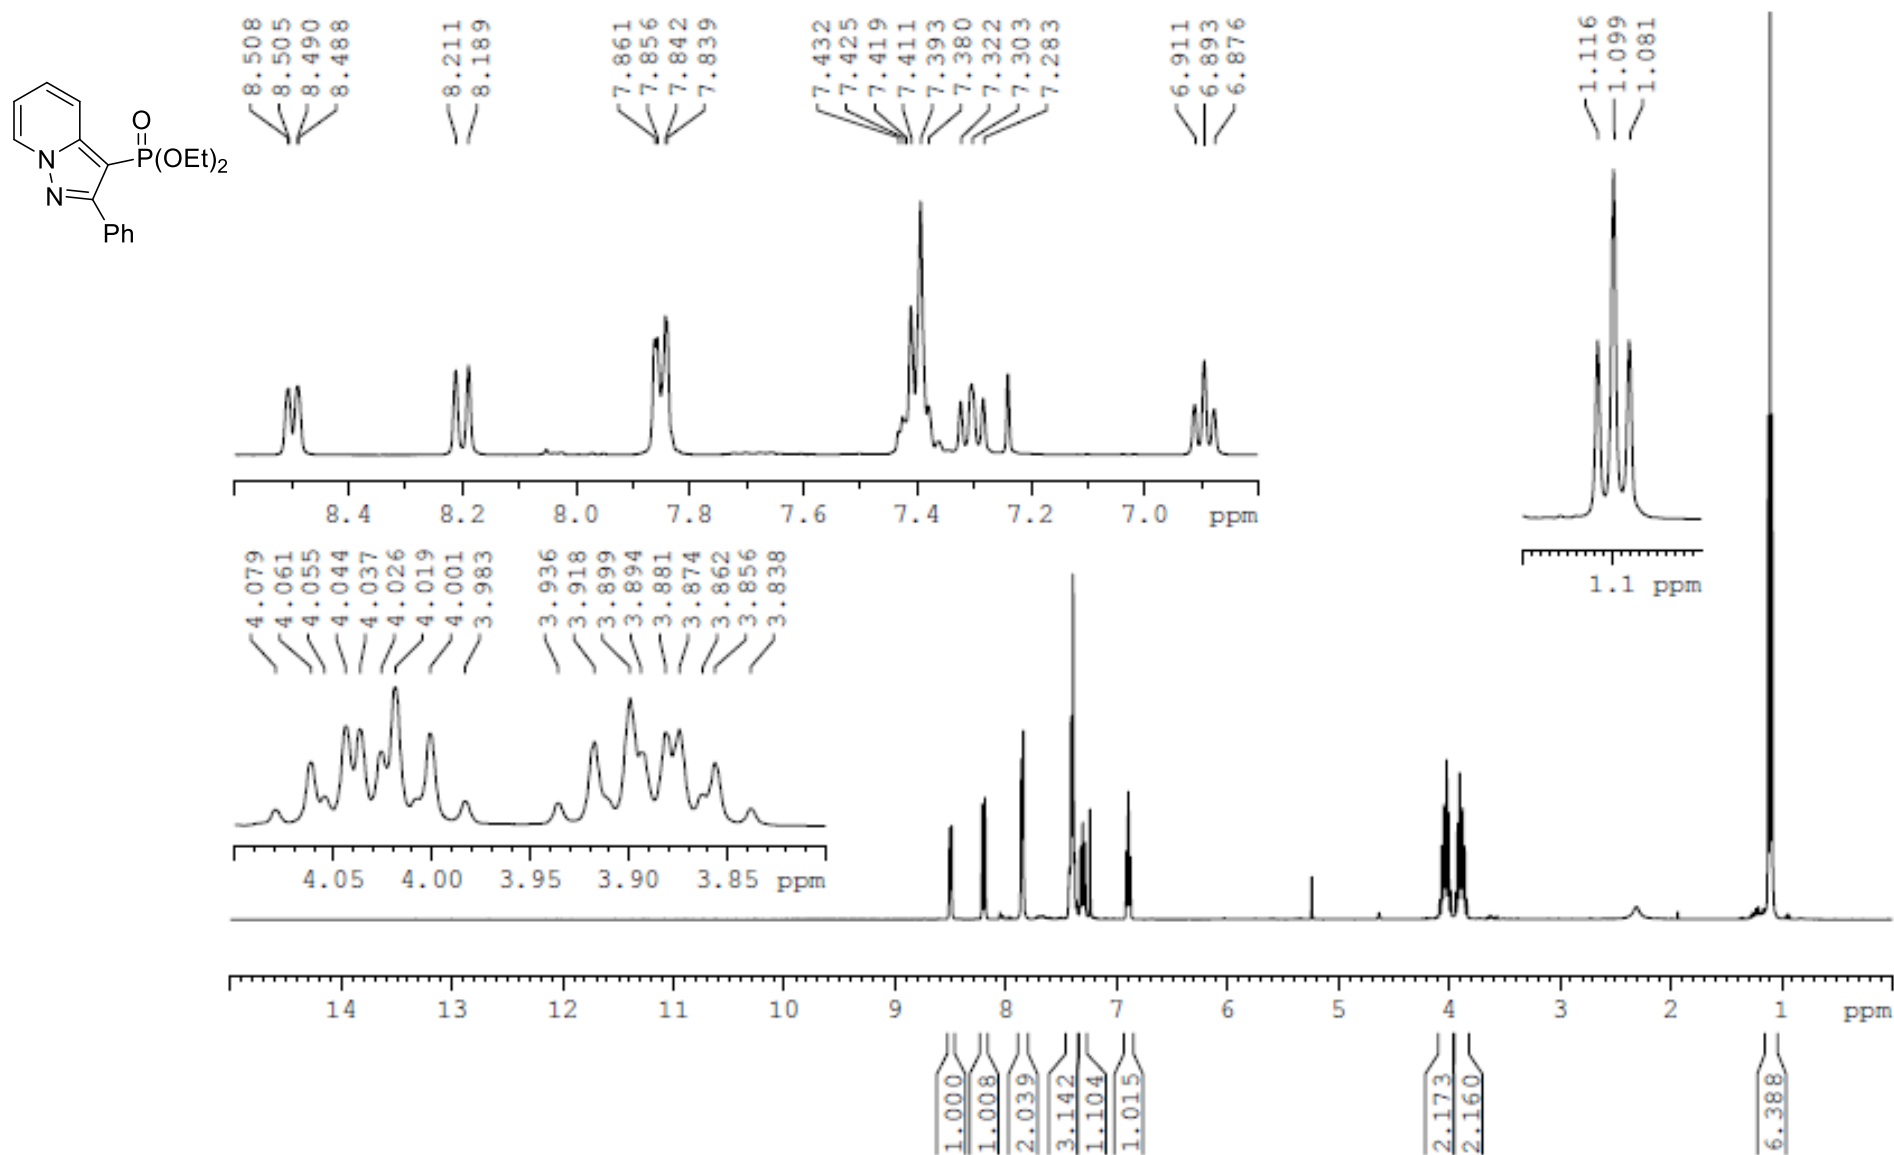

Diethyl (2-phenylpyrazolo[1,5-*a*]pyridin-3-yl)phosphonate (3a)  $^{13}\text{C}$  NMR.

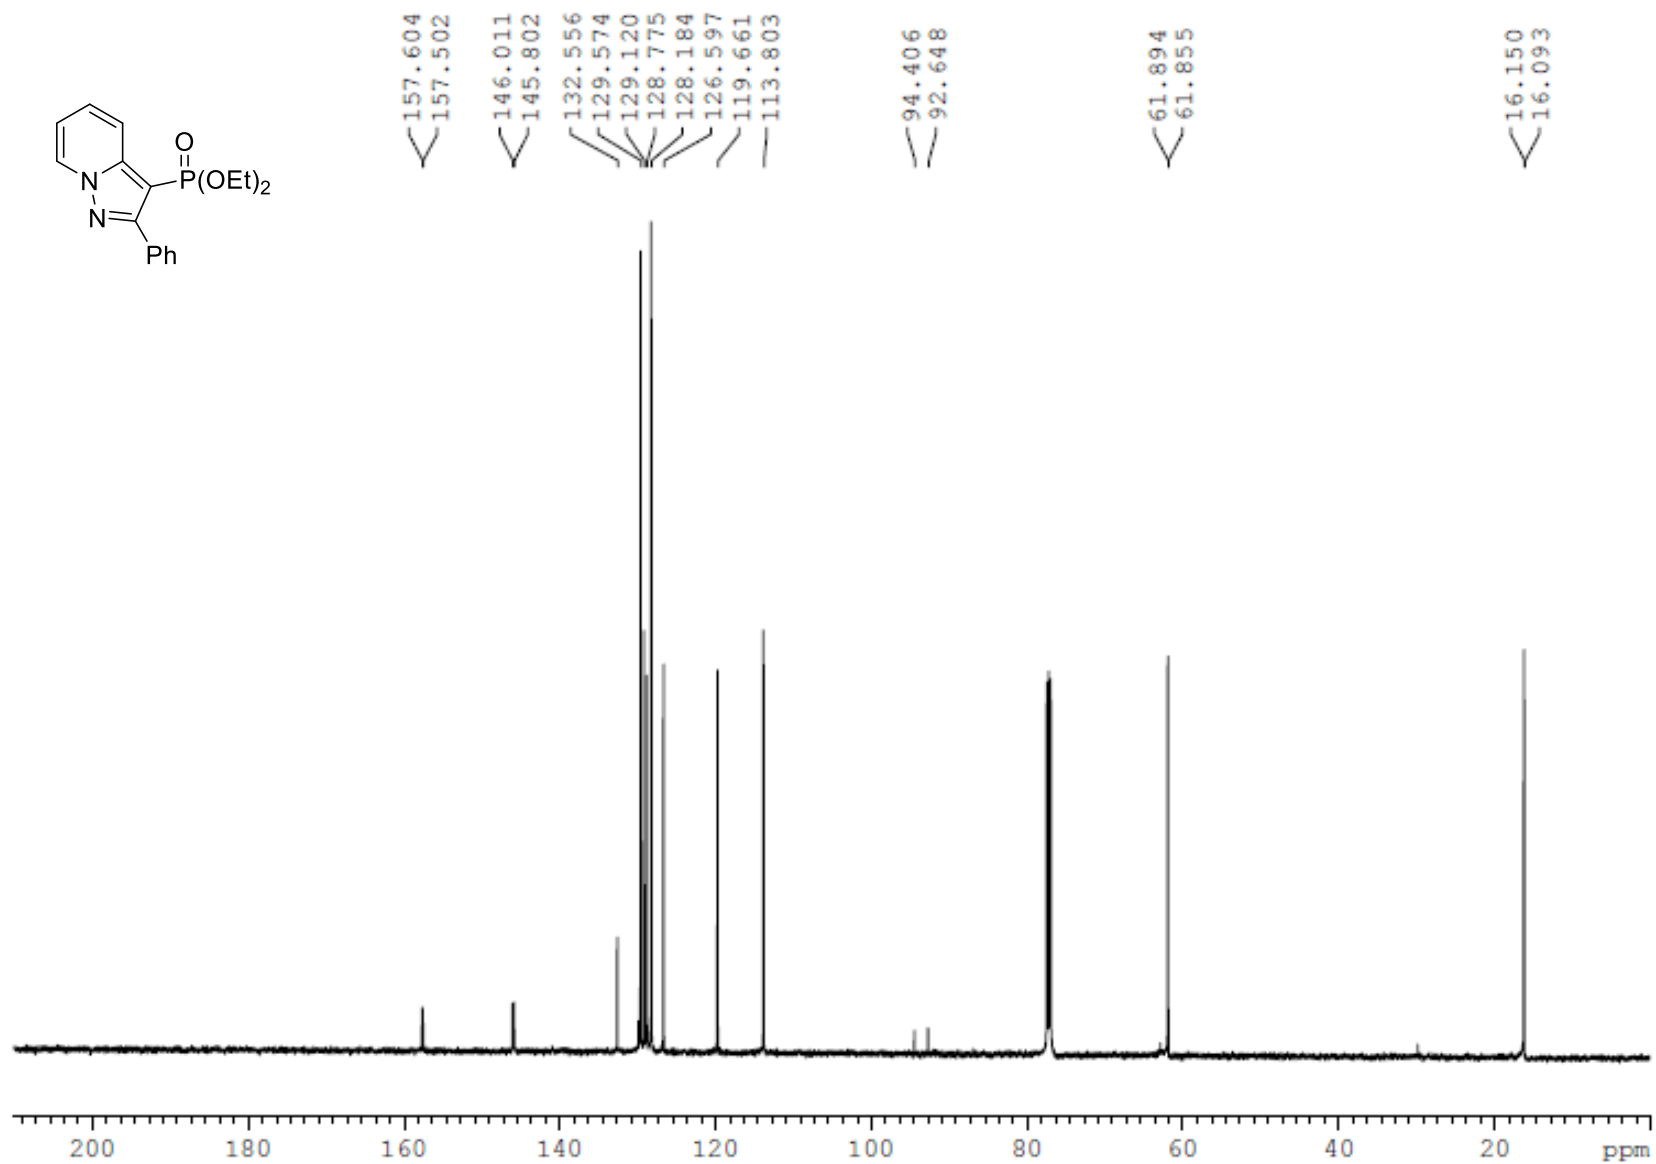

**Diethyl (2-phenylpyrazolo[1,5-*a*]pyridin-3-yl)phosphonate (3a)  $^{31}\text{P}$  NMR.**

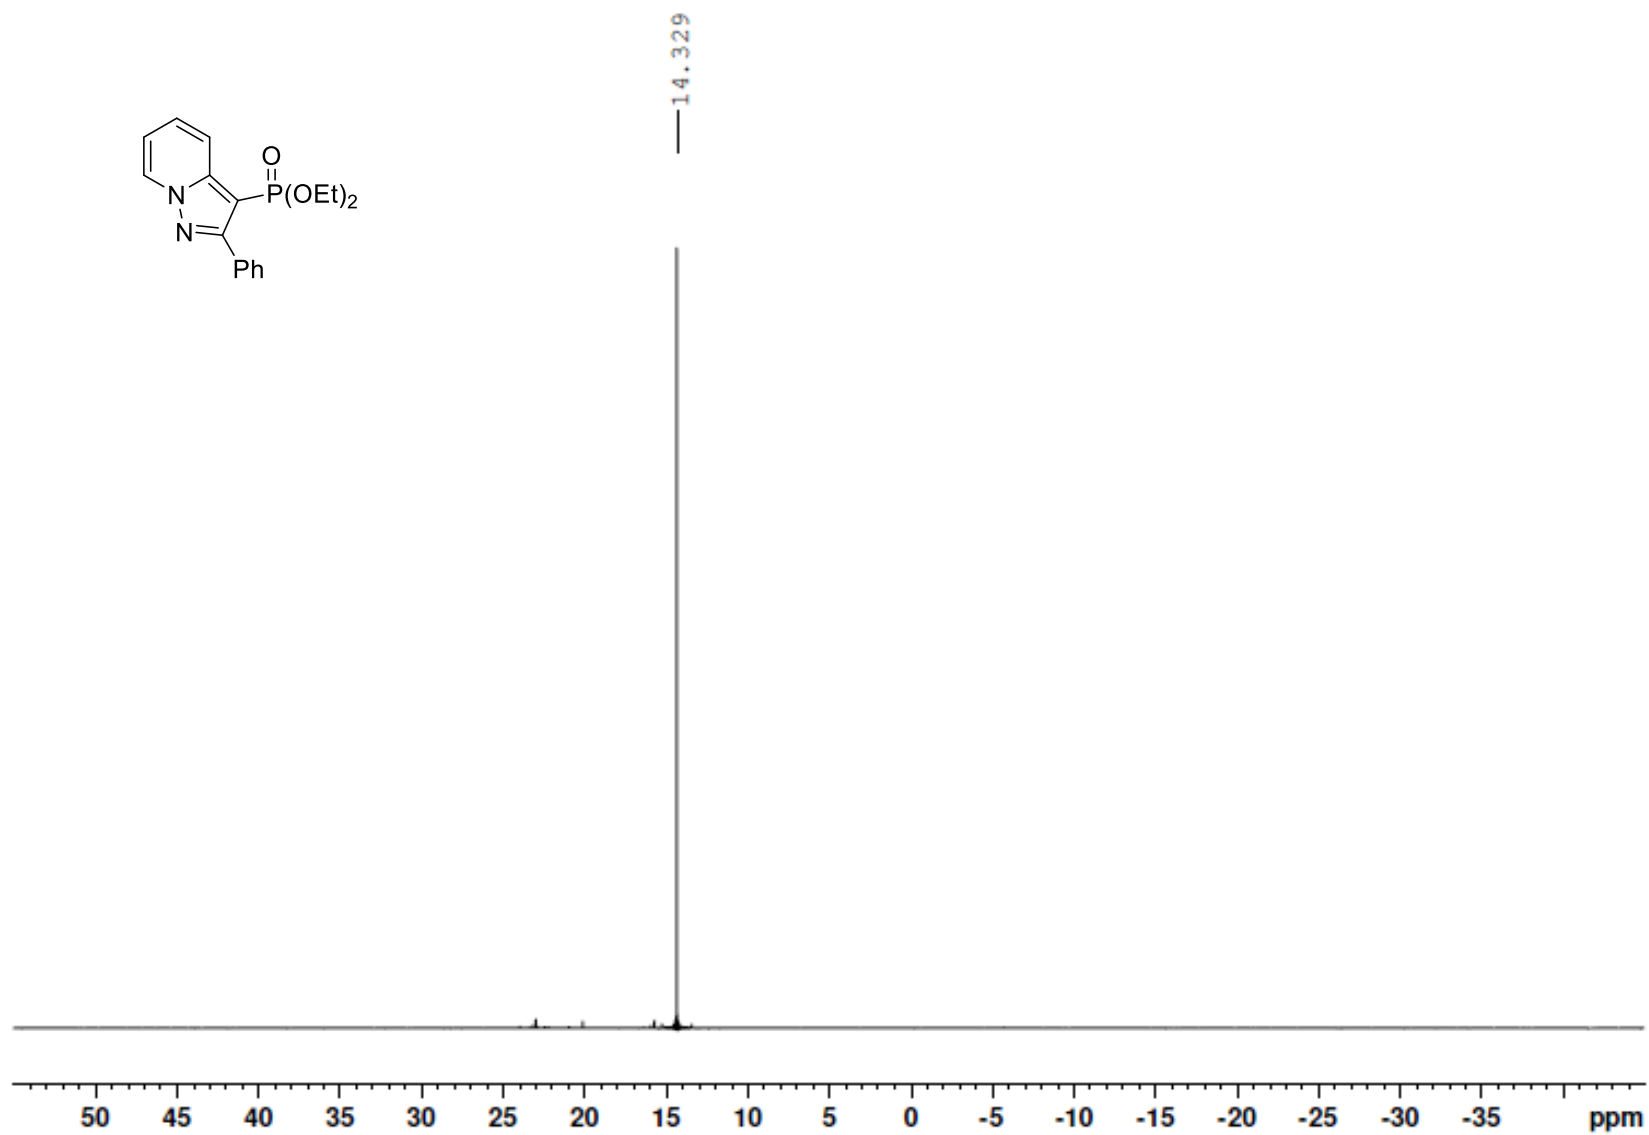

Diethyl (5-methyl-2-phenylpyrazolo[1,5-a]pyridin-3-yl)phosphonate (3b)  $^1\text{H}$  NMR.

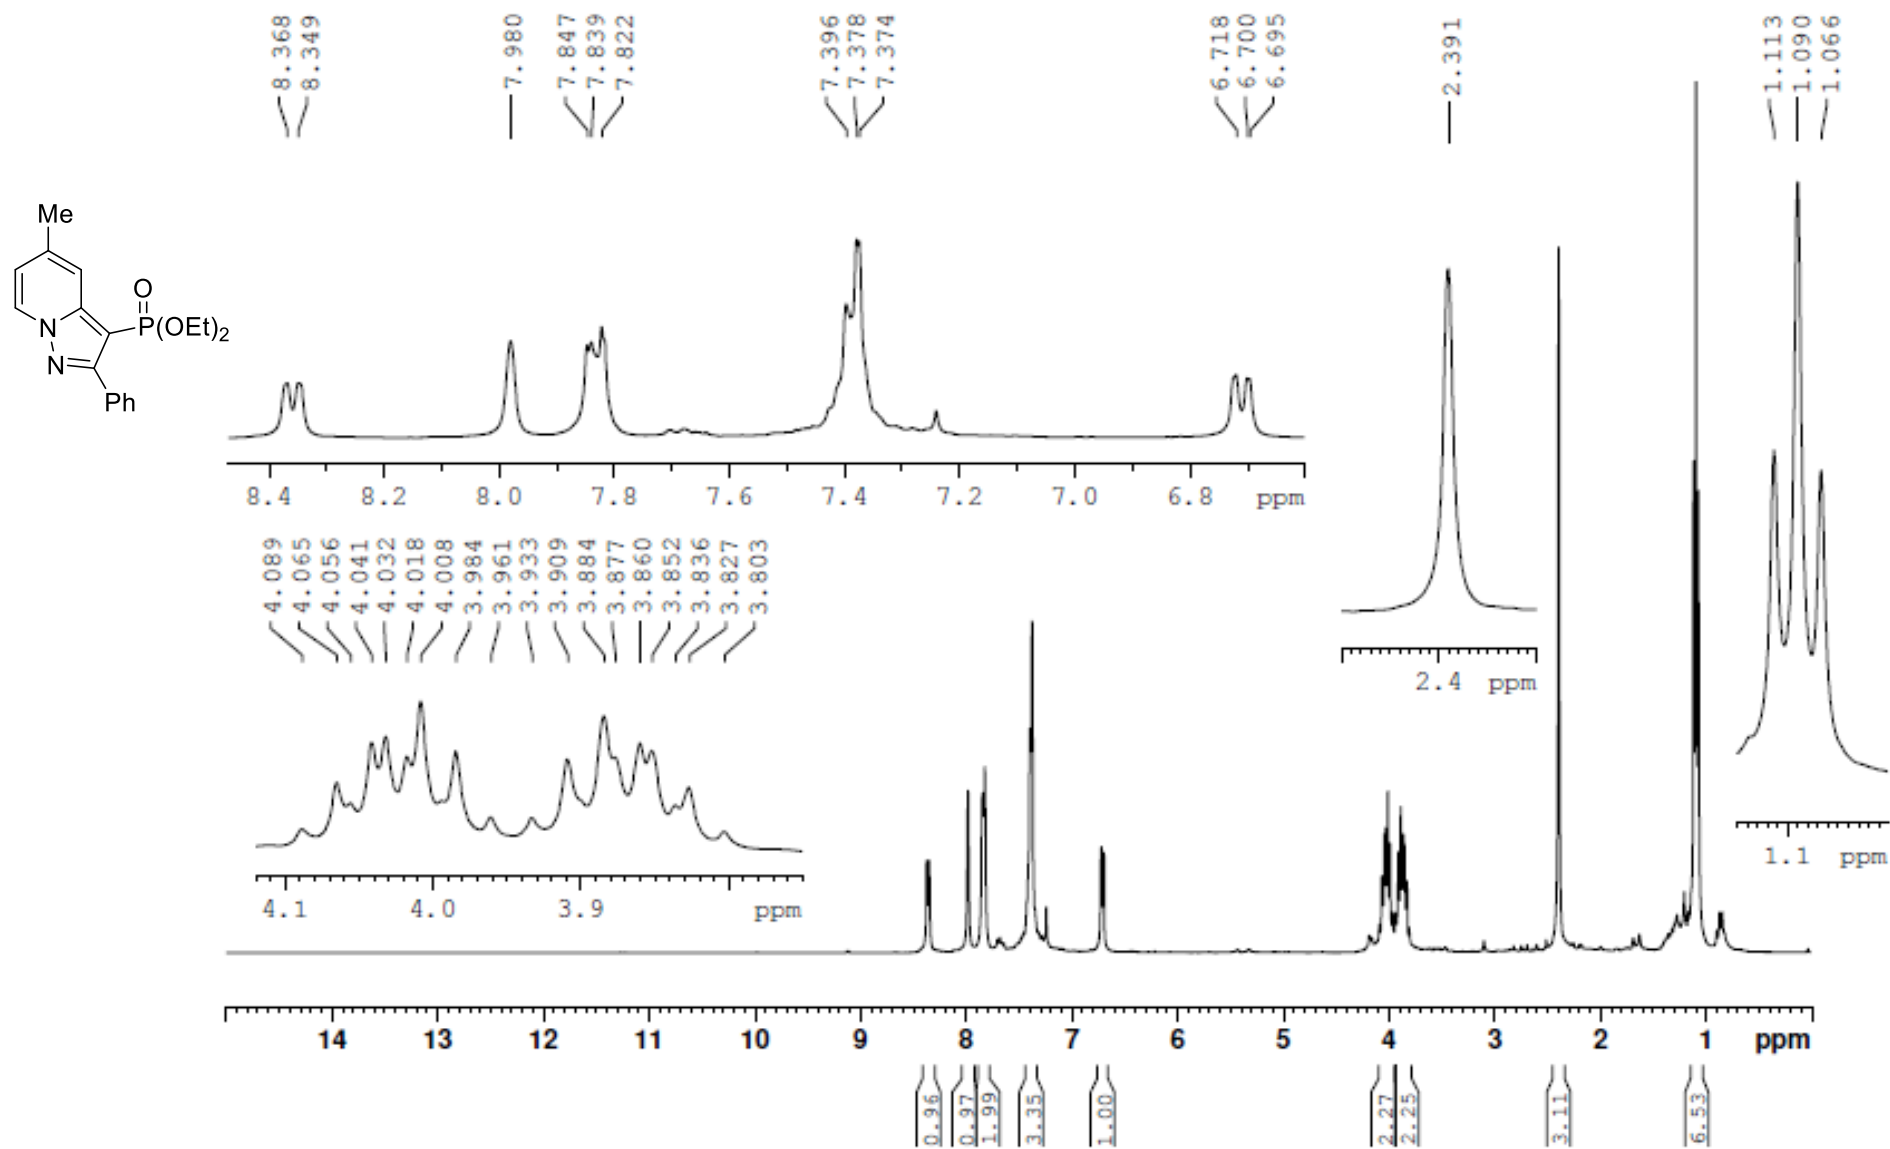

Diethyl (5-methyl-2-phenylpyrazolo[1,5-a]pyridin-3-yl)phosphonate (3b)  $^{13}\text{C}$  NMR.

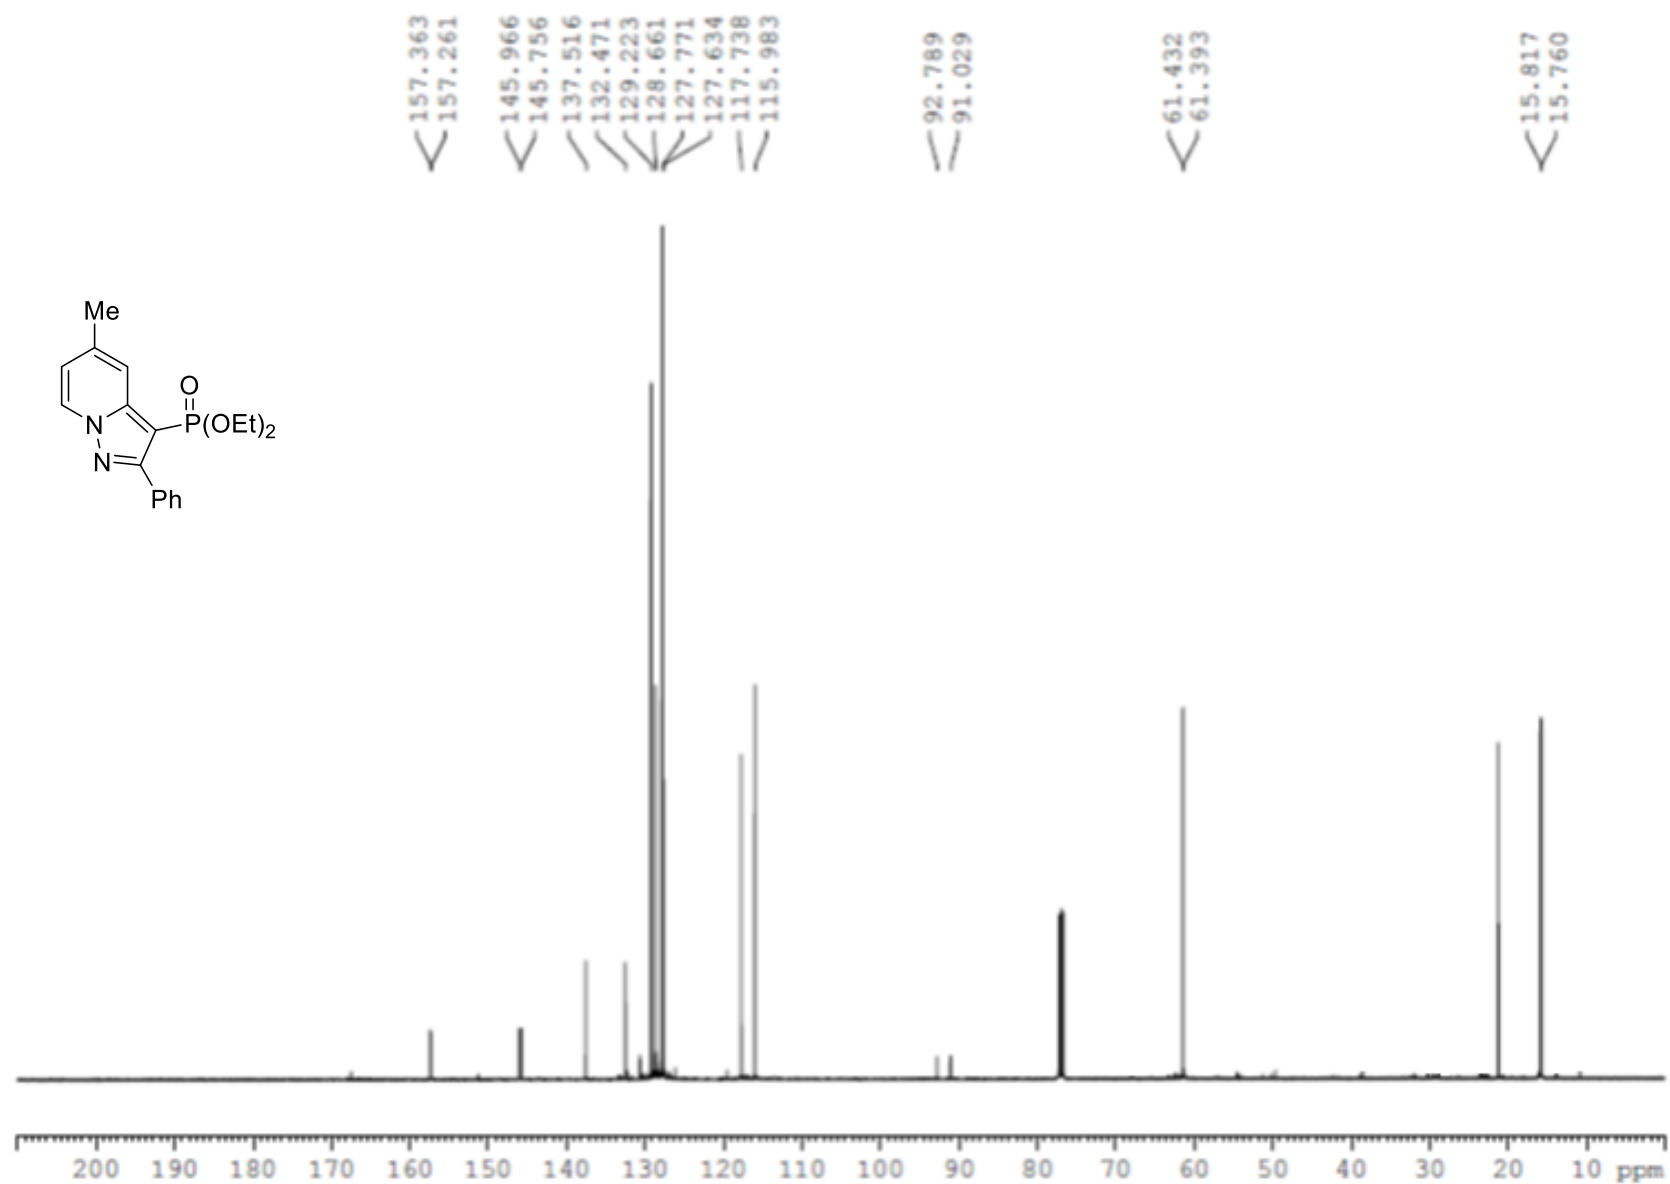

**Diethyl (5-methyl-2-phenylpyrazolo[1,5-a]pyridin-3-yl)phosphonate (3b)  $^1\text{H}$  NMR.**

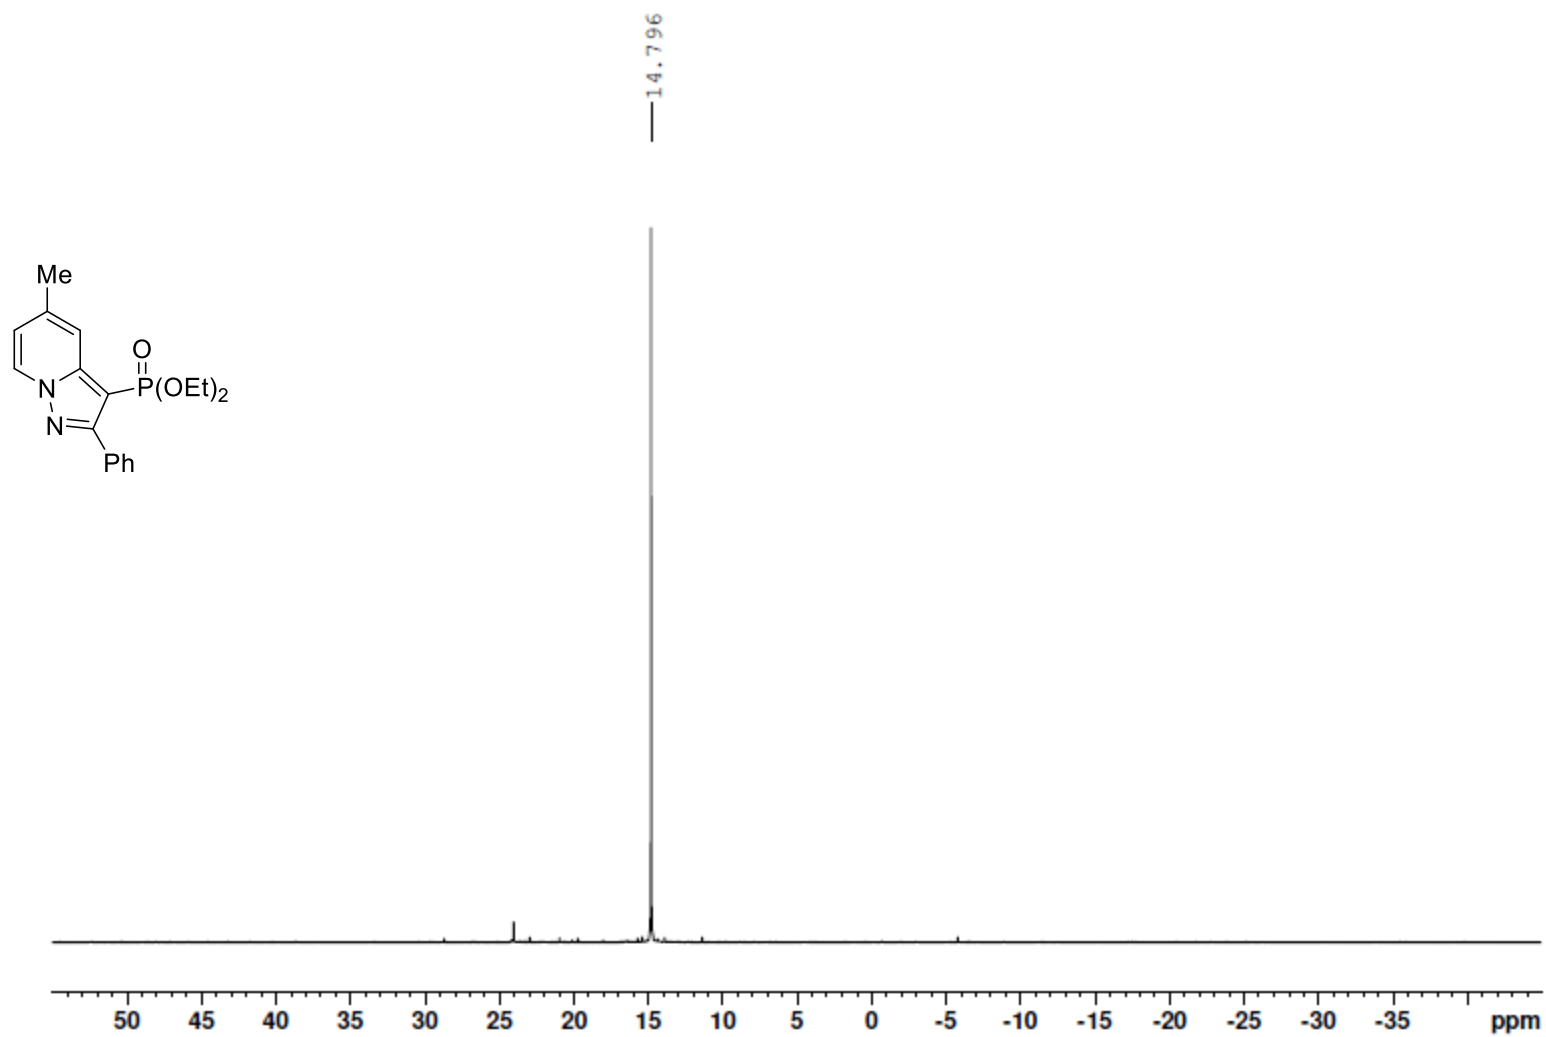



Diethyl (7-methyl-2-phenylpyrazolo[1,5-a]pyridin-3-yl)phosphonate (3c)  $^1\text{H}$  NMR

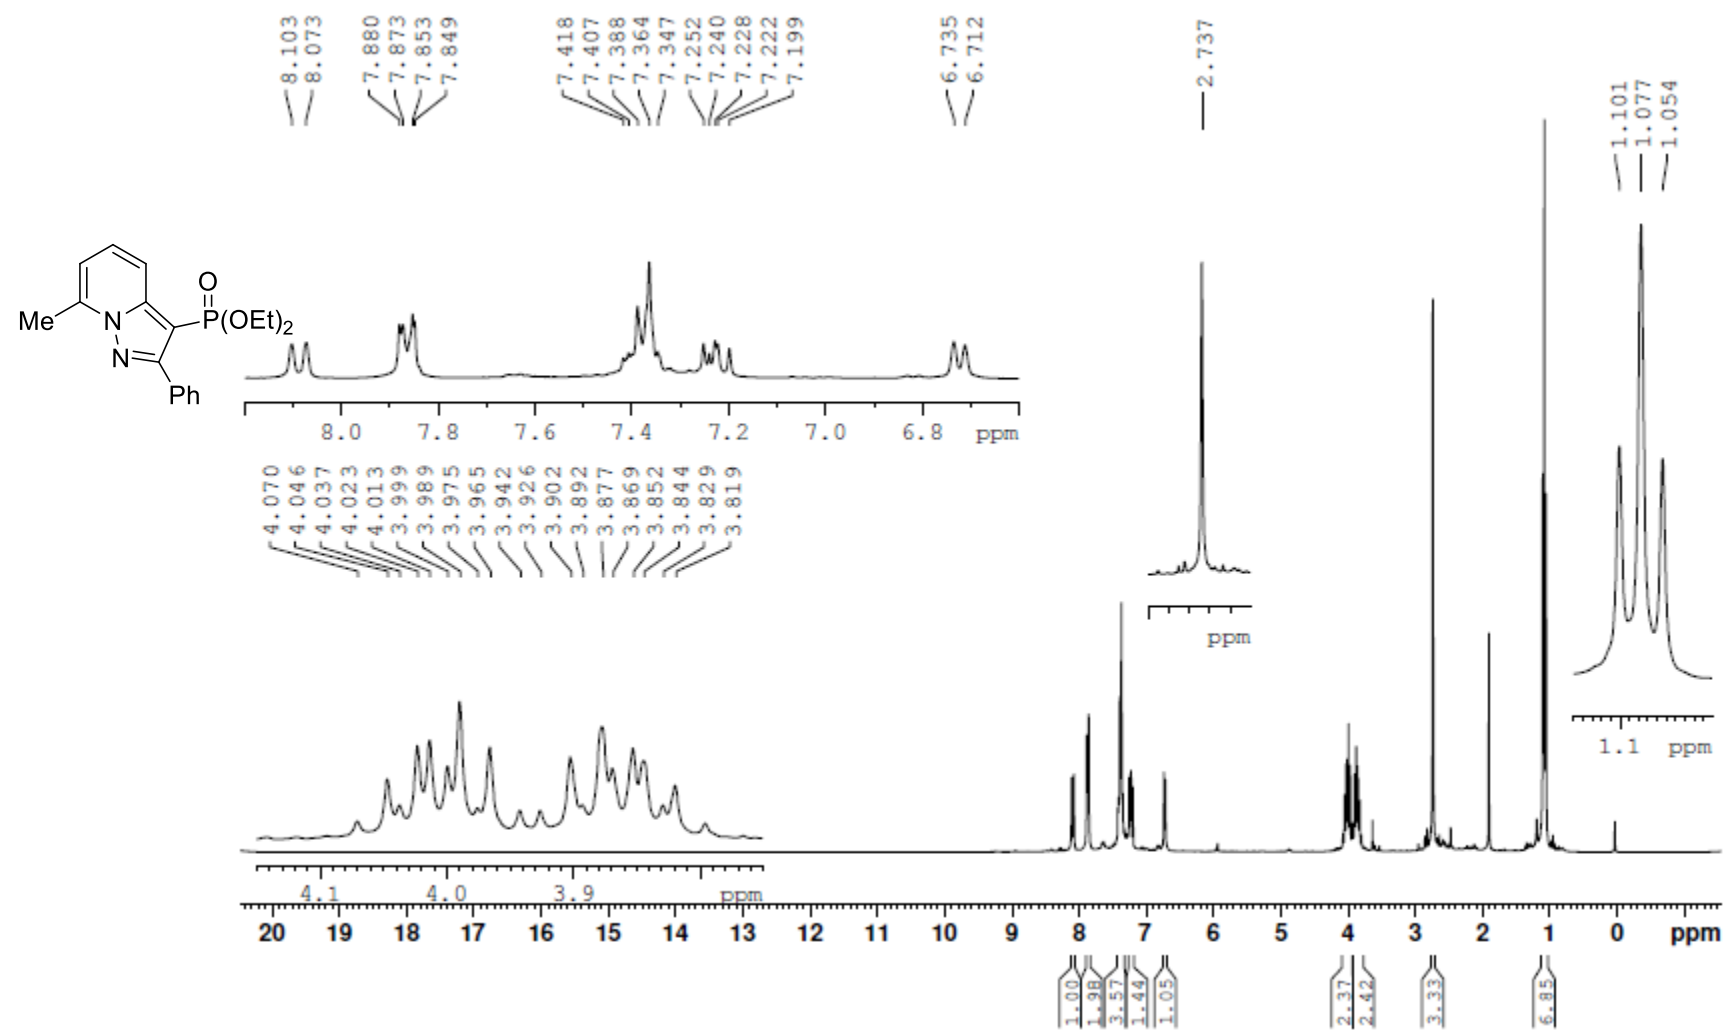

Diethyl (7-methyl-2-phenylpyrazolo[1,5-a]pyridin-3-yl)phosphonate (3c)  $^{13}\text{C}$  NMR

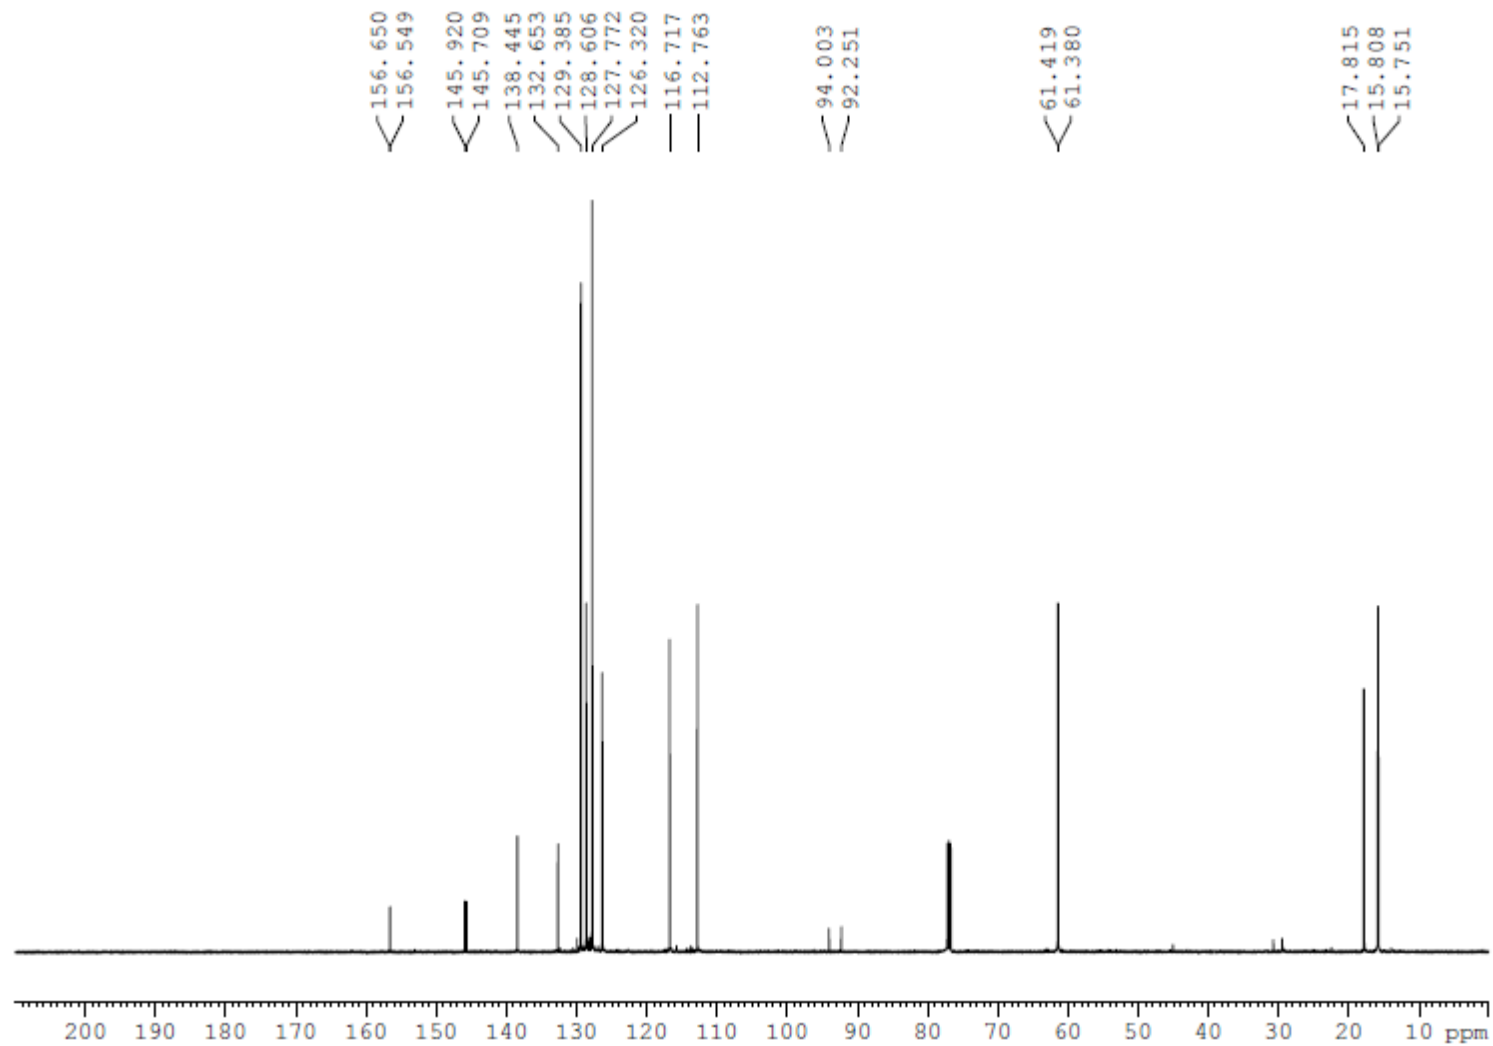

Diethyl (7-methyl-2-phenylpyrazolo[1,5-a]pyridin-3-yl)phosphonate (3c)  $^{31}\text{P}$  NMR

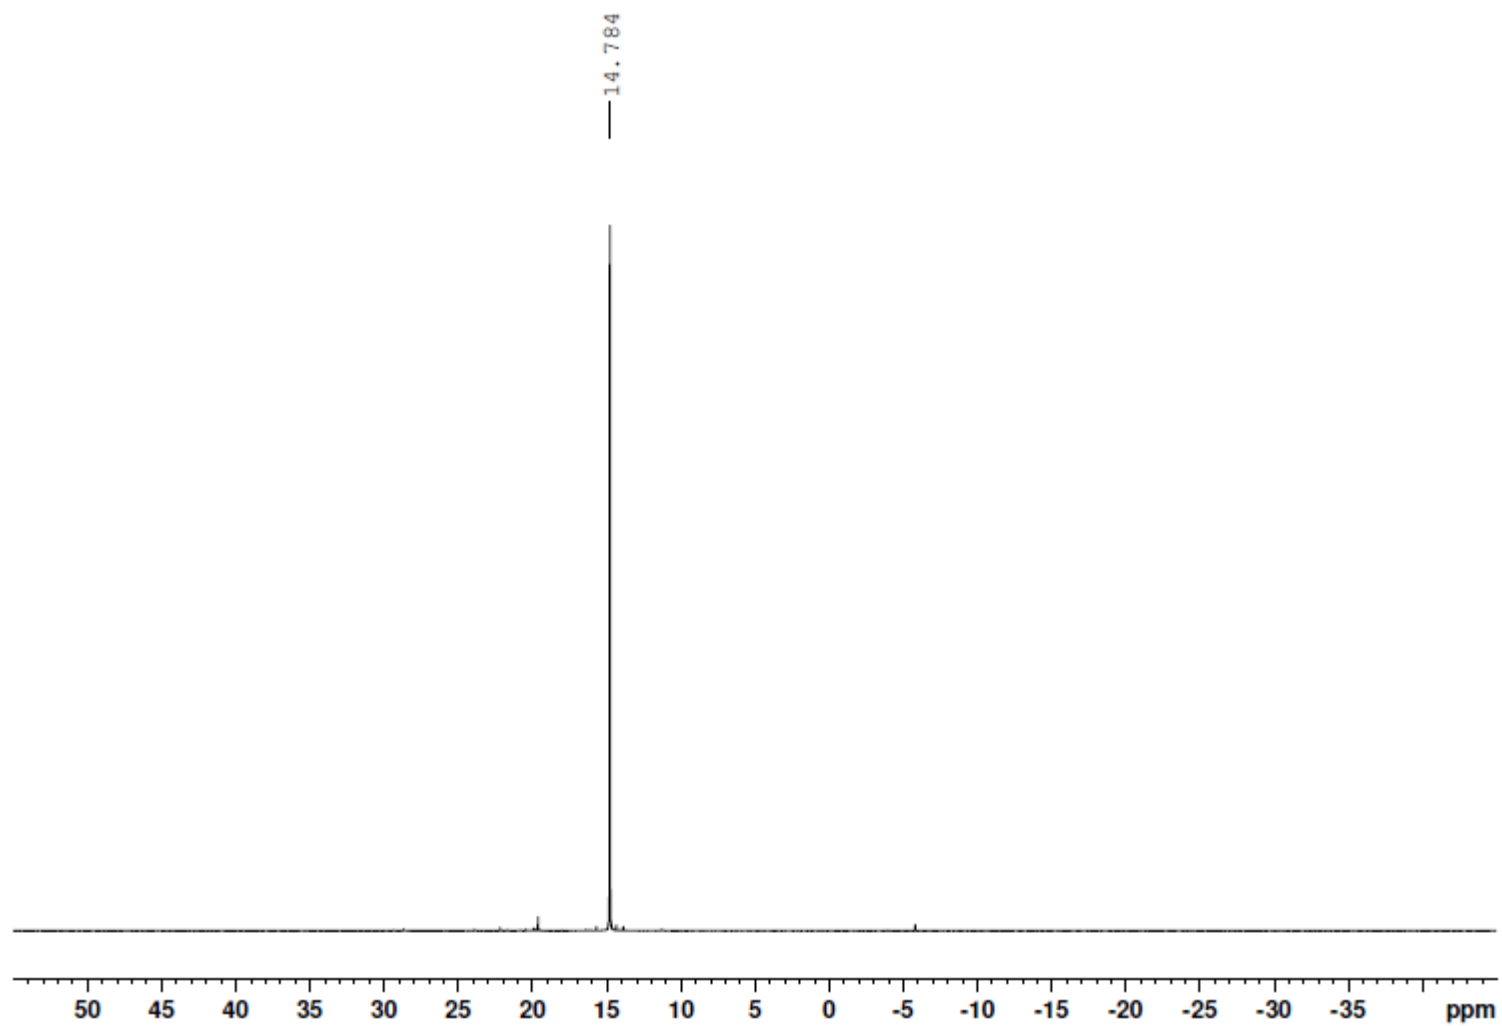

**Diethyl (2,7-diphenylpyrazolo[1,5-a]pyridin-3-yl)phosphonate (3d) <sup>1</sup>H NMR.**

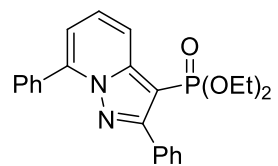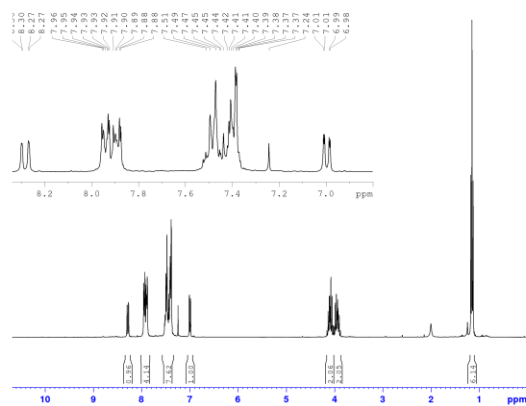

**Diethyl (2,7-diphenylpyrazolo[1,5-a]pyridin-3-yl)phosphonate (3d)  $^{13}\text{C}$  NMR.**

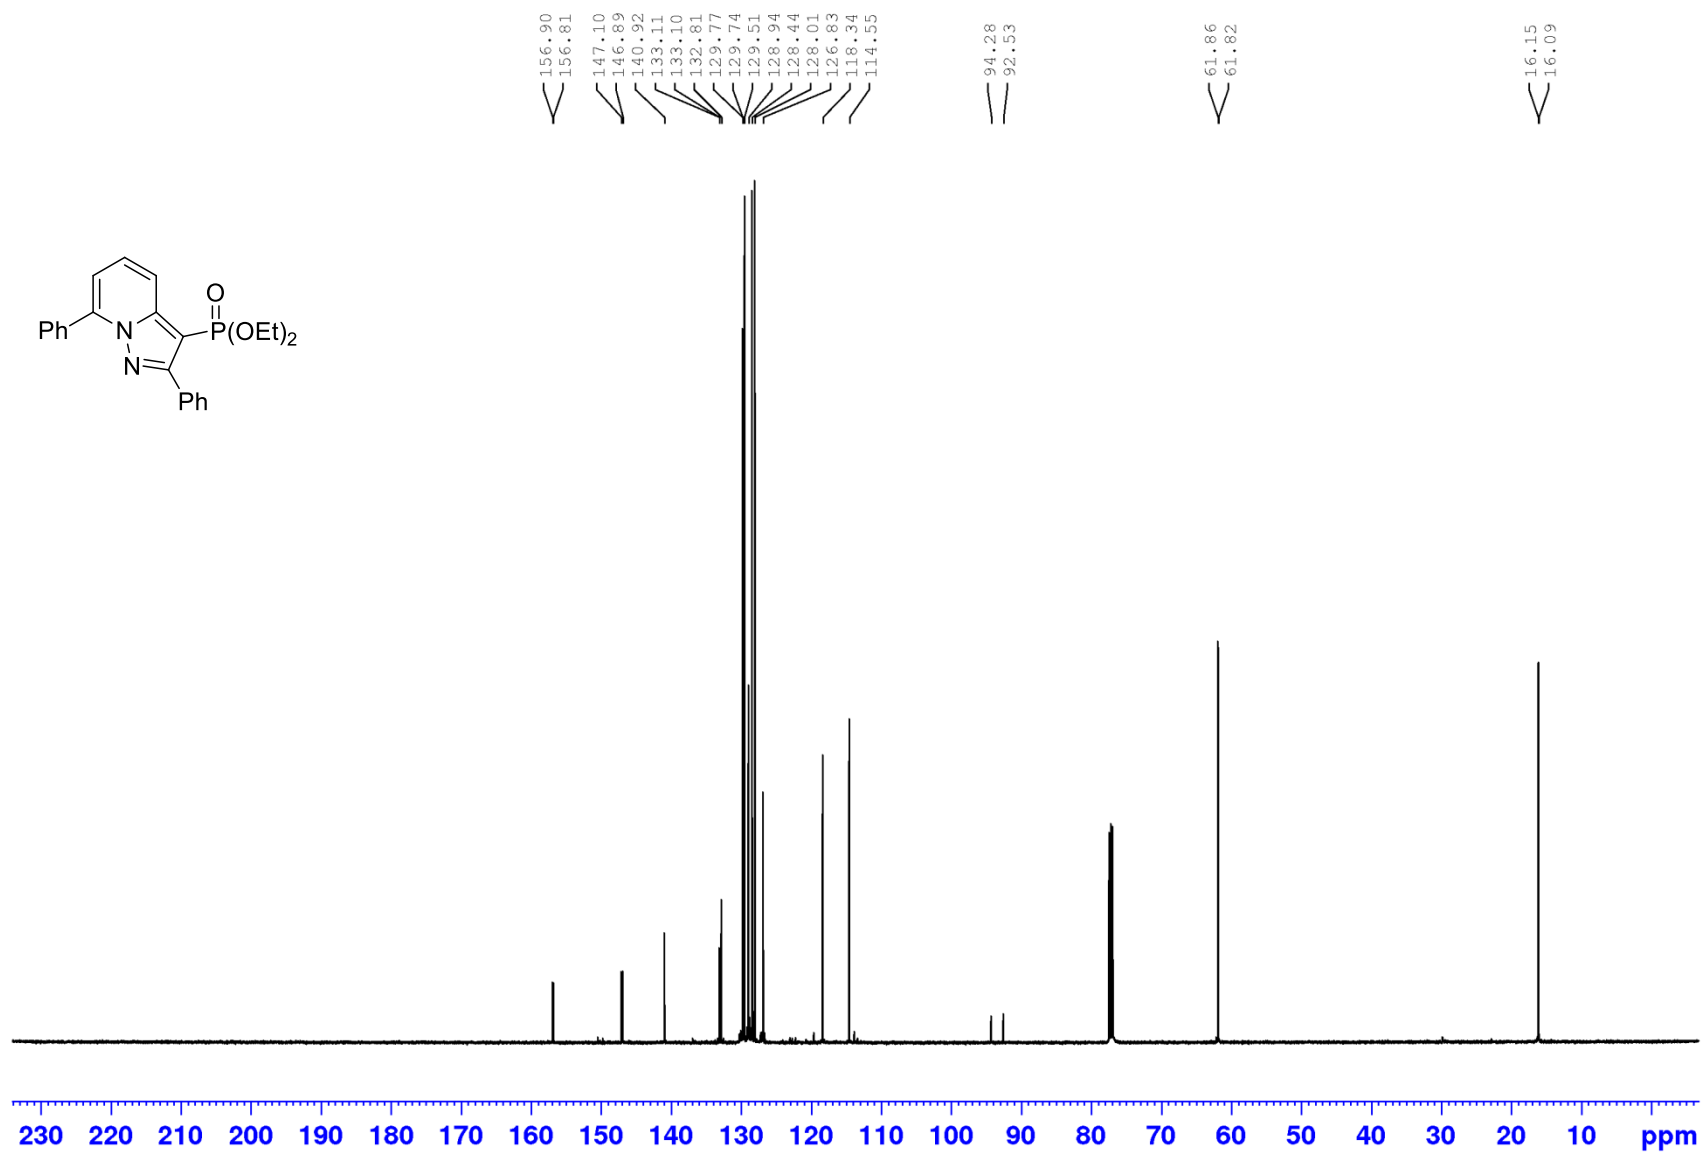

**Diethyl (2,7-diphenylpyrazolo[1,5-a]pyridin-3-yl)phosphonate (3d)  $^{31}\text{P}$  NMR.**

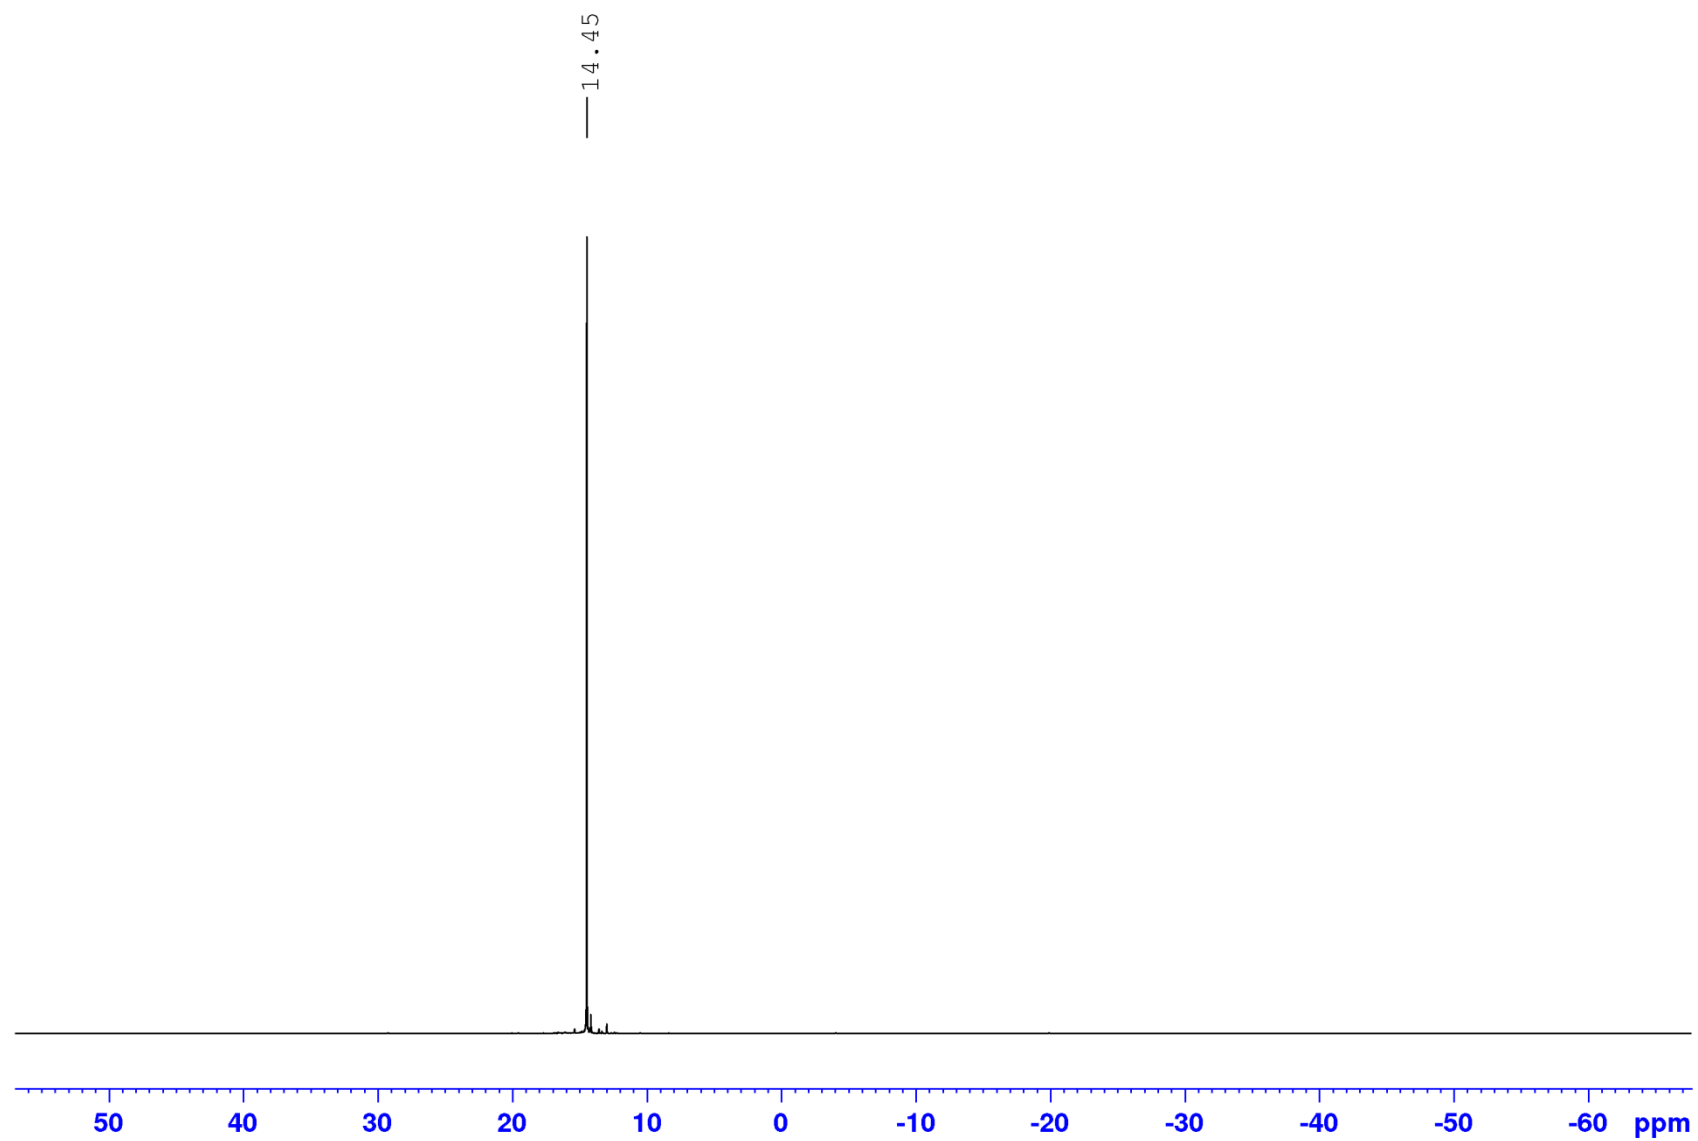

**Ethyl 3-(diethoxyphosphoryl)-2-phenylpyrazolo[1,5-a]pyridine-5-carboxylate <sup>1</sup>H NMR (3e).**

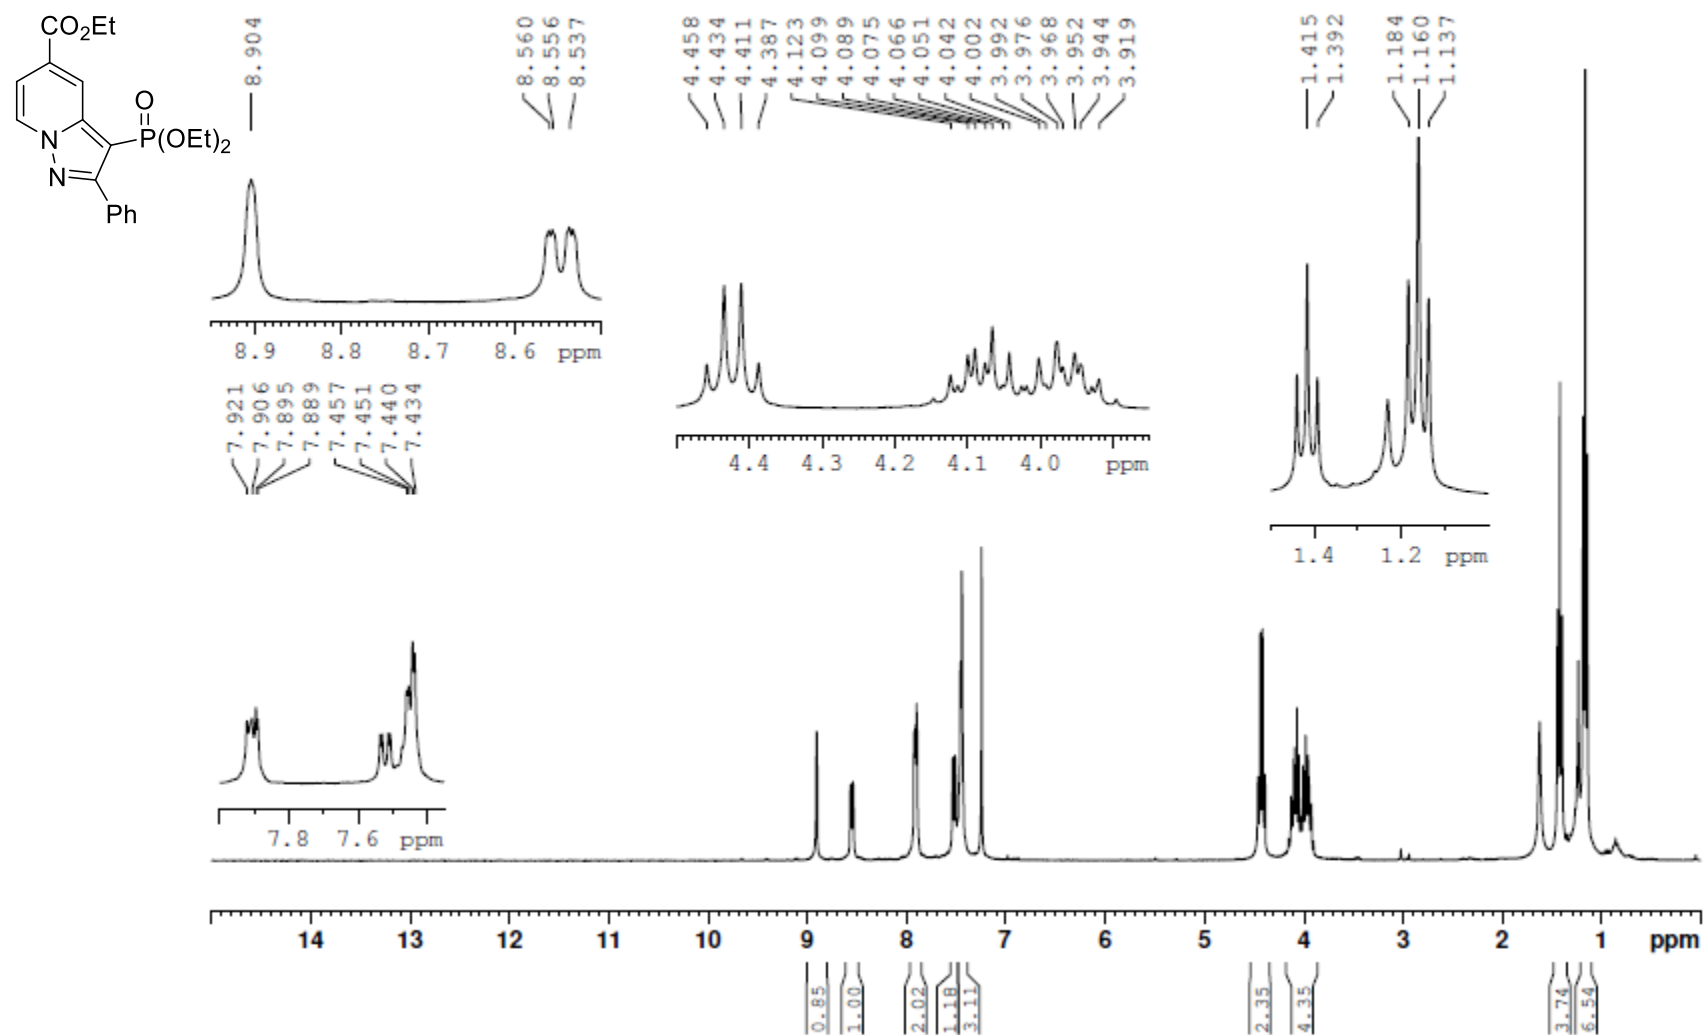

**Ethyl 3-(diethoxyphosphoryl)-2-phenylpyrazolo[1,5-a]pyridine-5-carboxylate <sup>13</sup>C NMR (3e).**

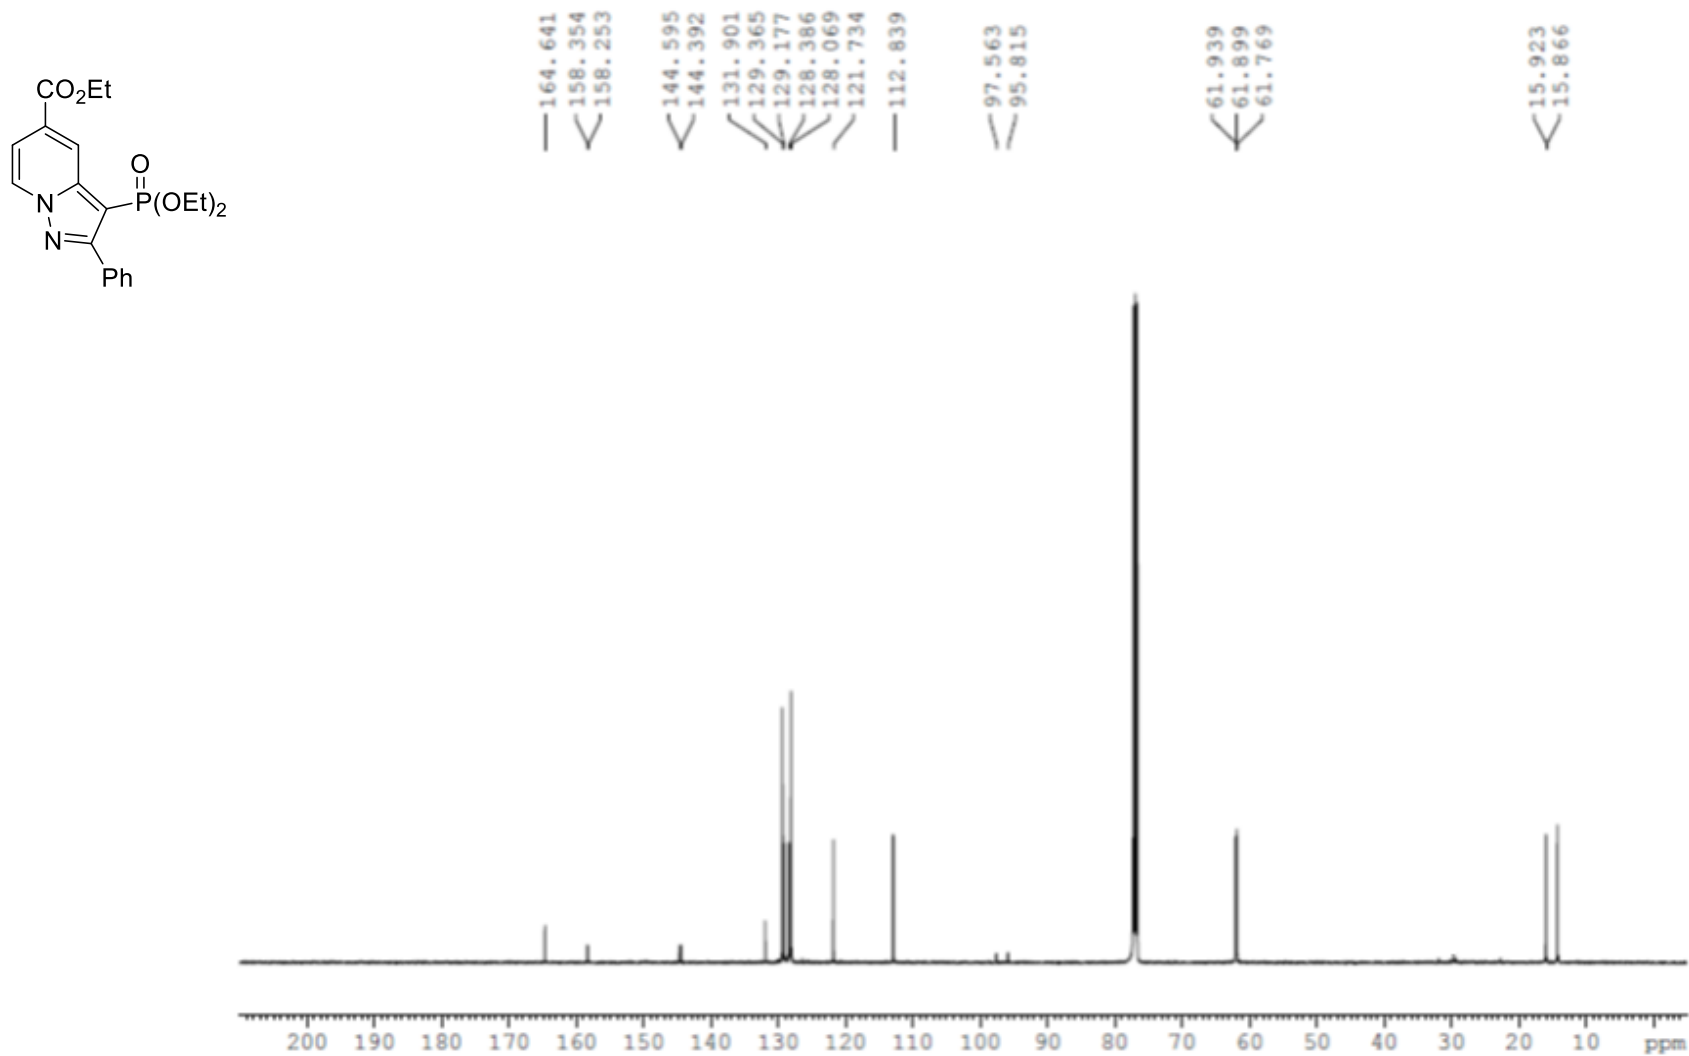



**Ethyl 3-(diethoxyphosphoryl)-2-phenylpyrazolo[1,5-a]pyridine-5-carboxylate  $^{31}\text{P}$  NMR (3e).**

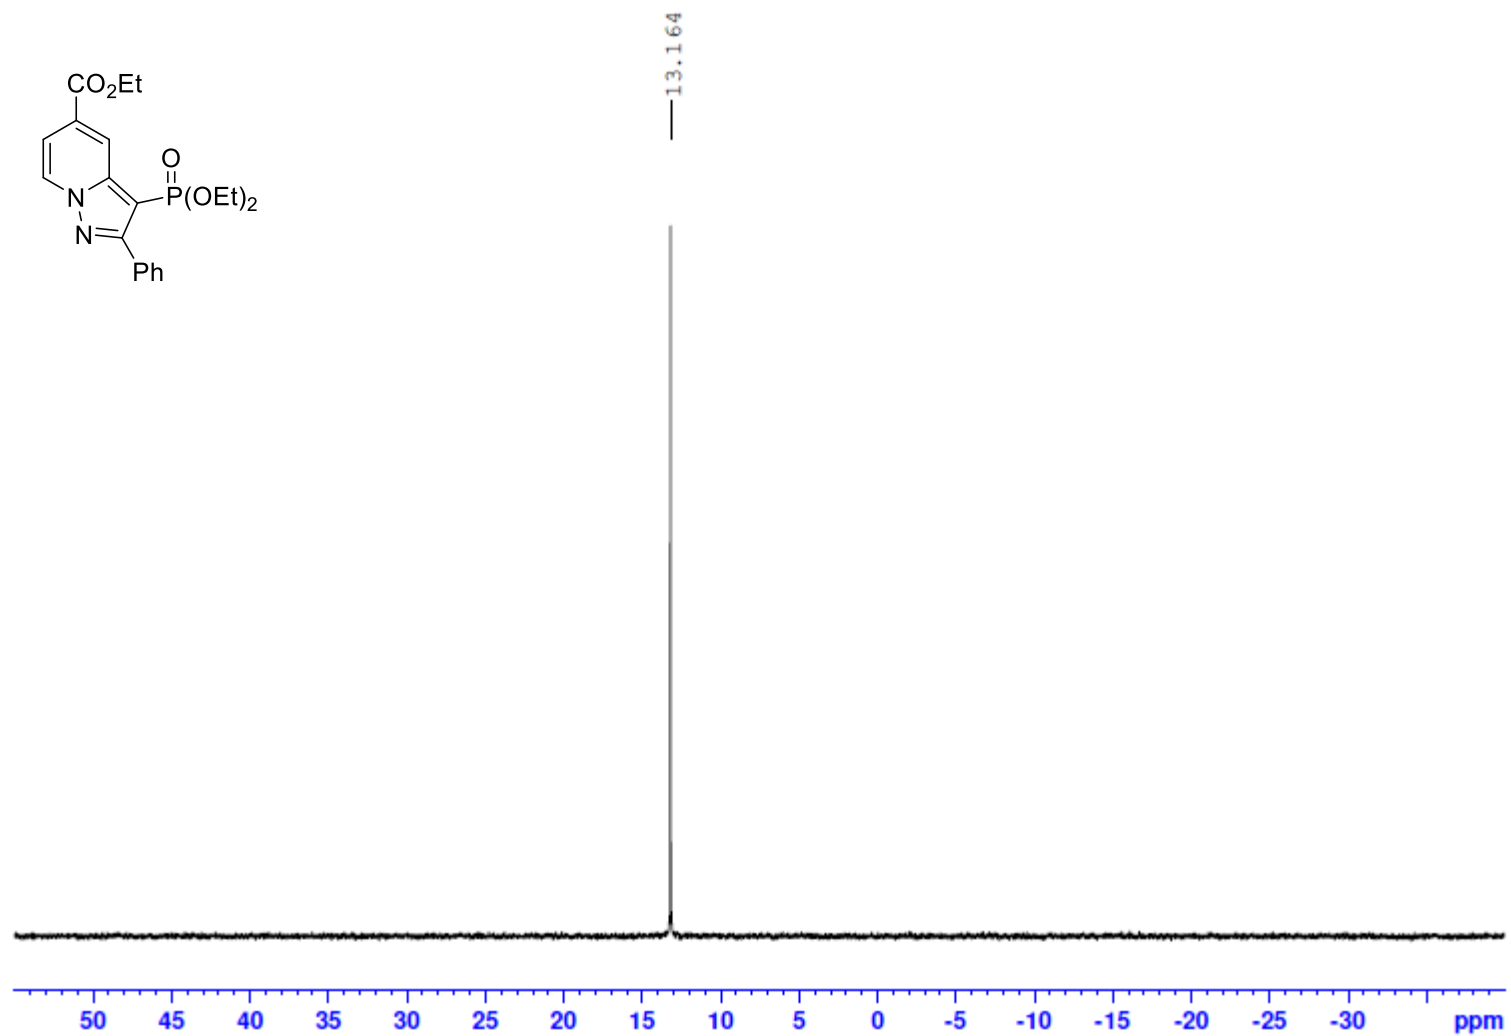

**Diethyl (5-methoxy-2-phenylpyrazolo[1,5-a]pyridin-3-yl)phosphonate (3f)  $^1\text{H}$  NMR.**

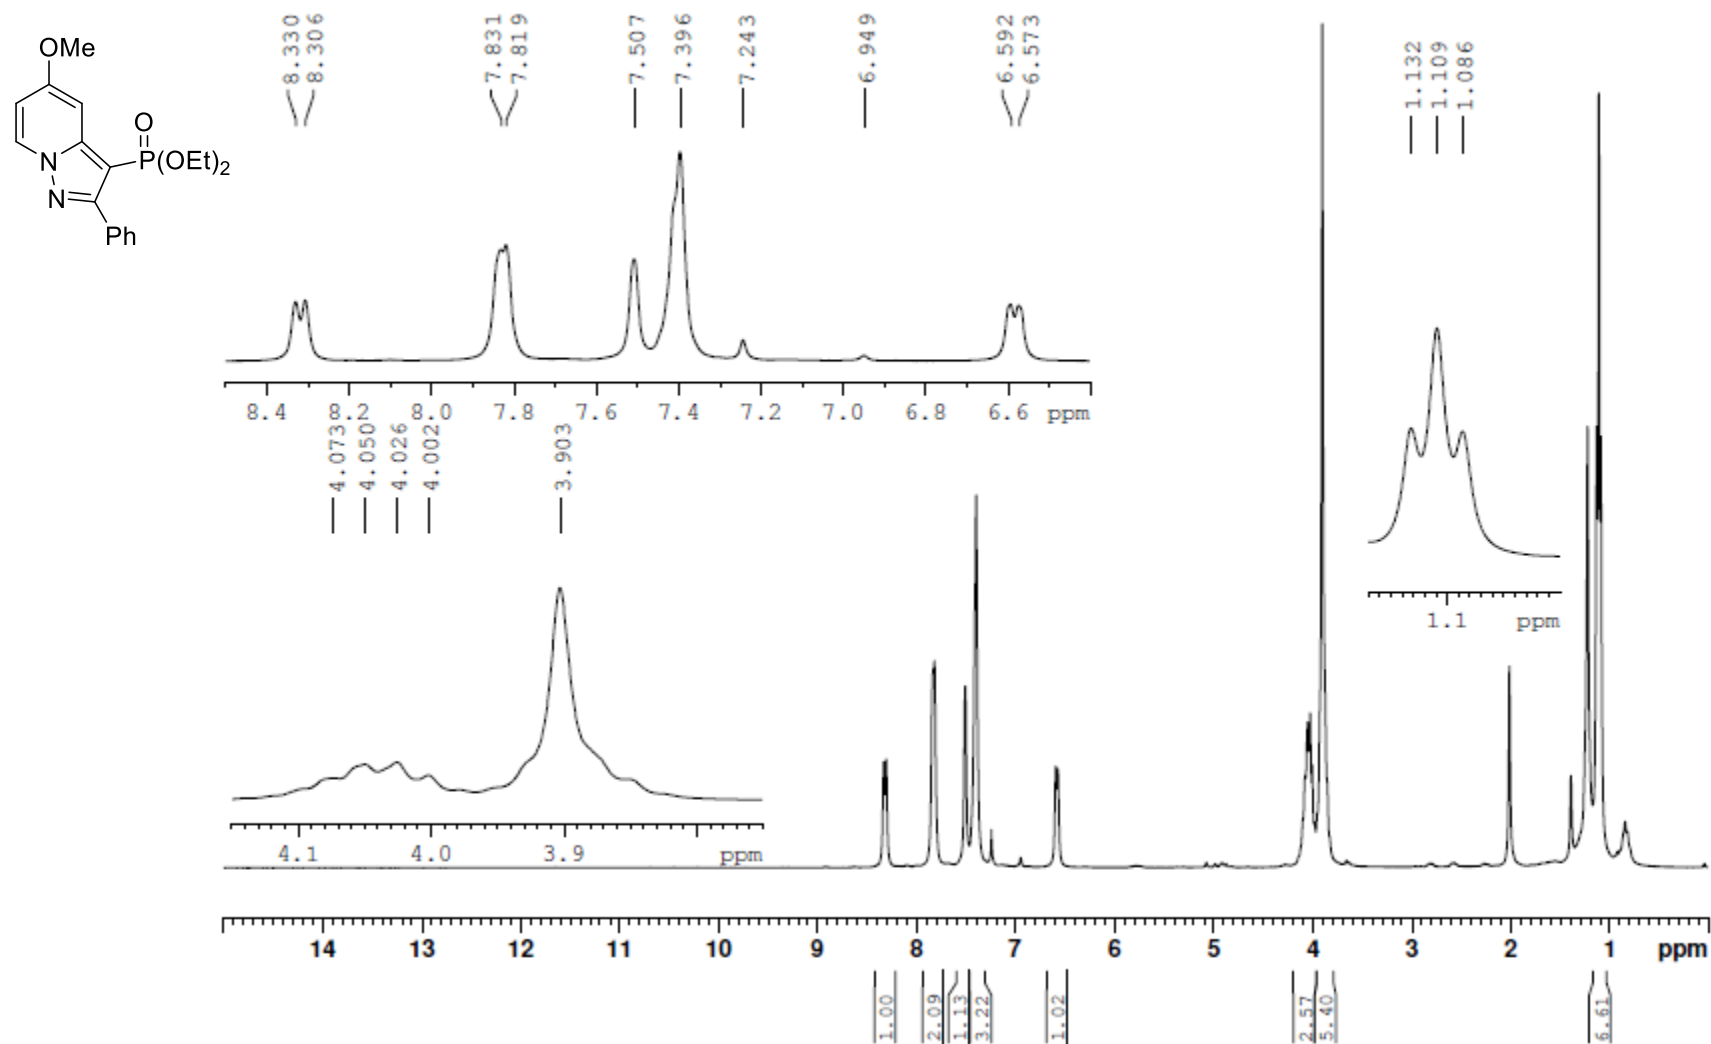

**Diethyl (5-methoxy-2-phenylpyrazolo[1,5-a]pyridin-3-yl)phosphonate (3f)  $^{13}\text{C}$  NMR.**

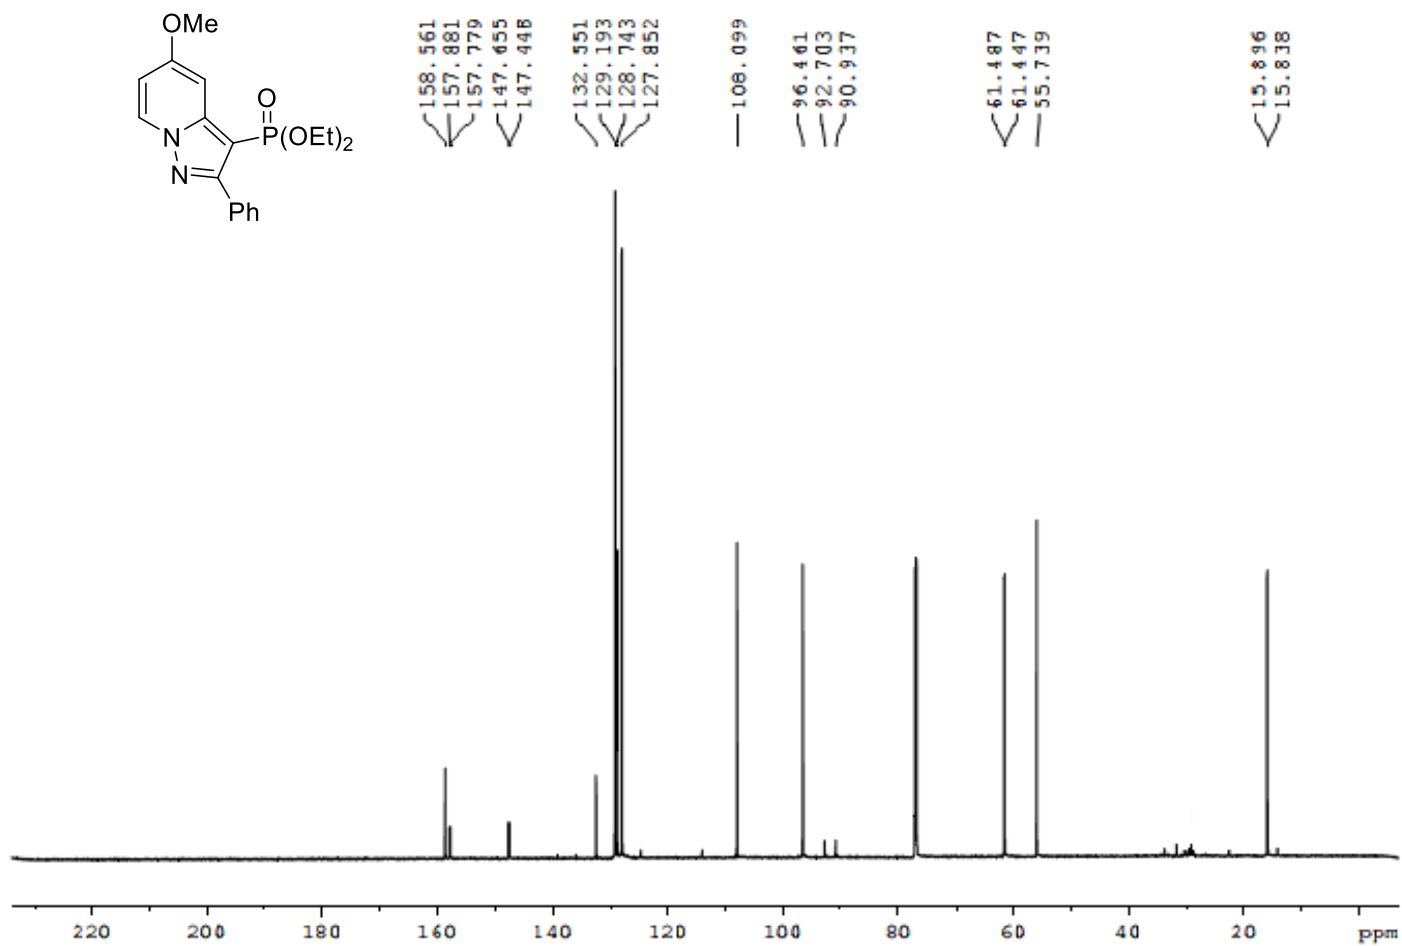

**Diethyl (5-methoxy-2-phenylpyrazolo[1,5-a]pyridin-3-yl)phosphonate (3f)  $^{31}\text{P}$  NMR.**

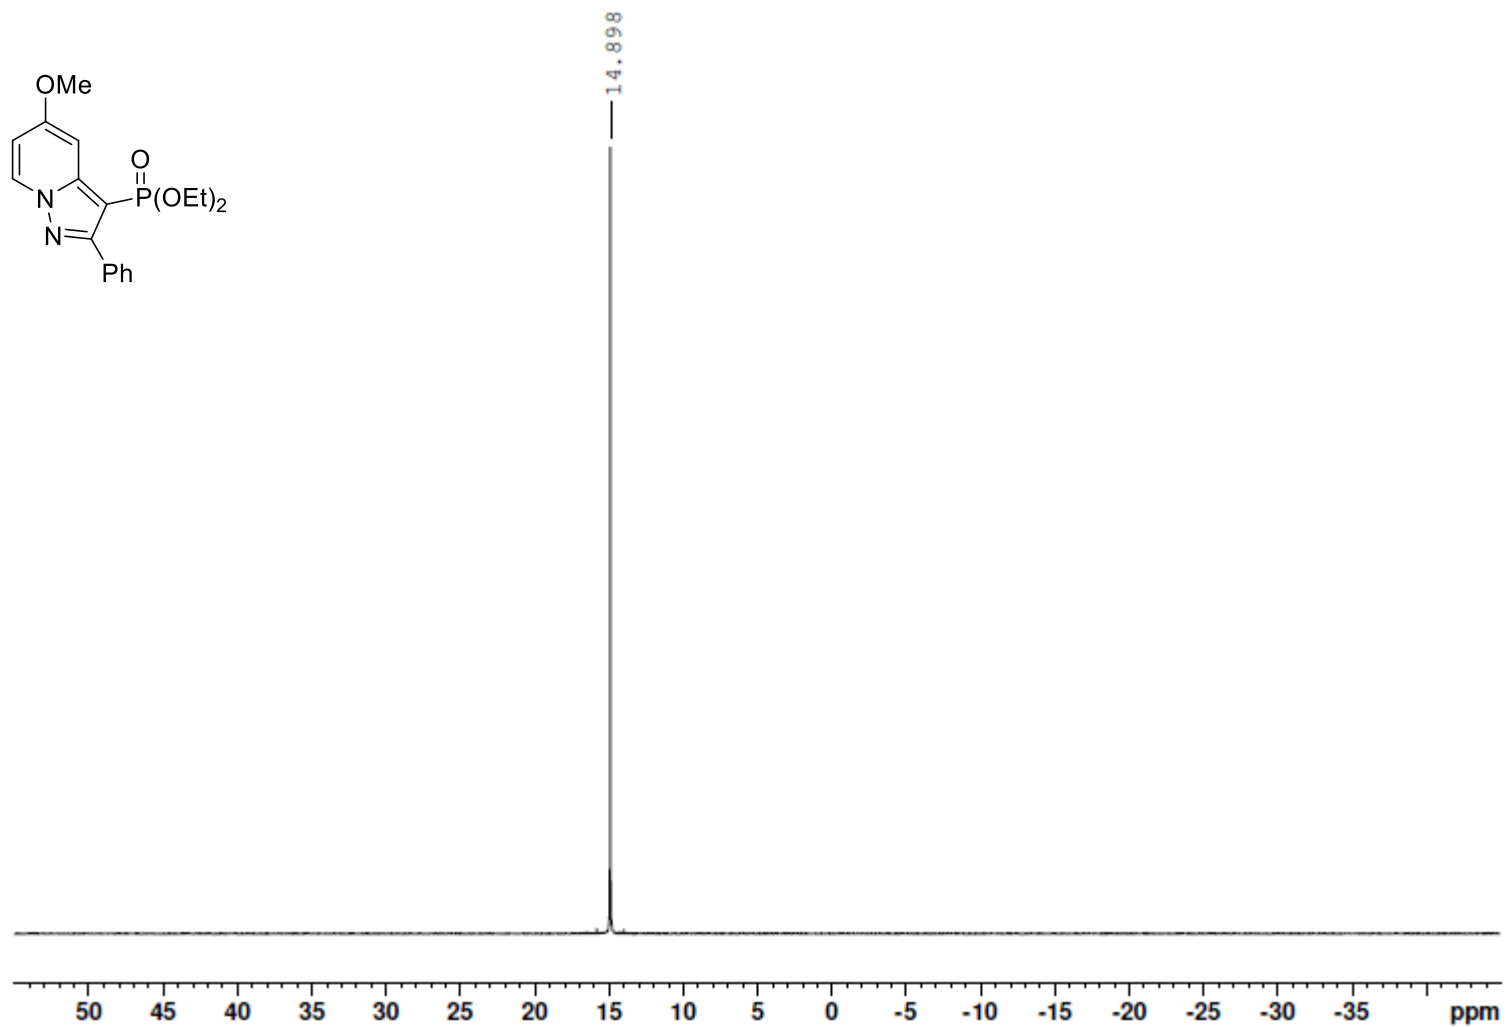

Diethyl (2-butylpyrazolo[1,5-a]pyridin-3-yl)phosphonate (3g)  $^1\text{H}$  NMR.

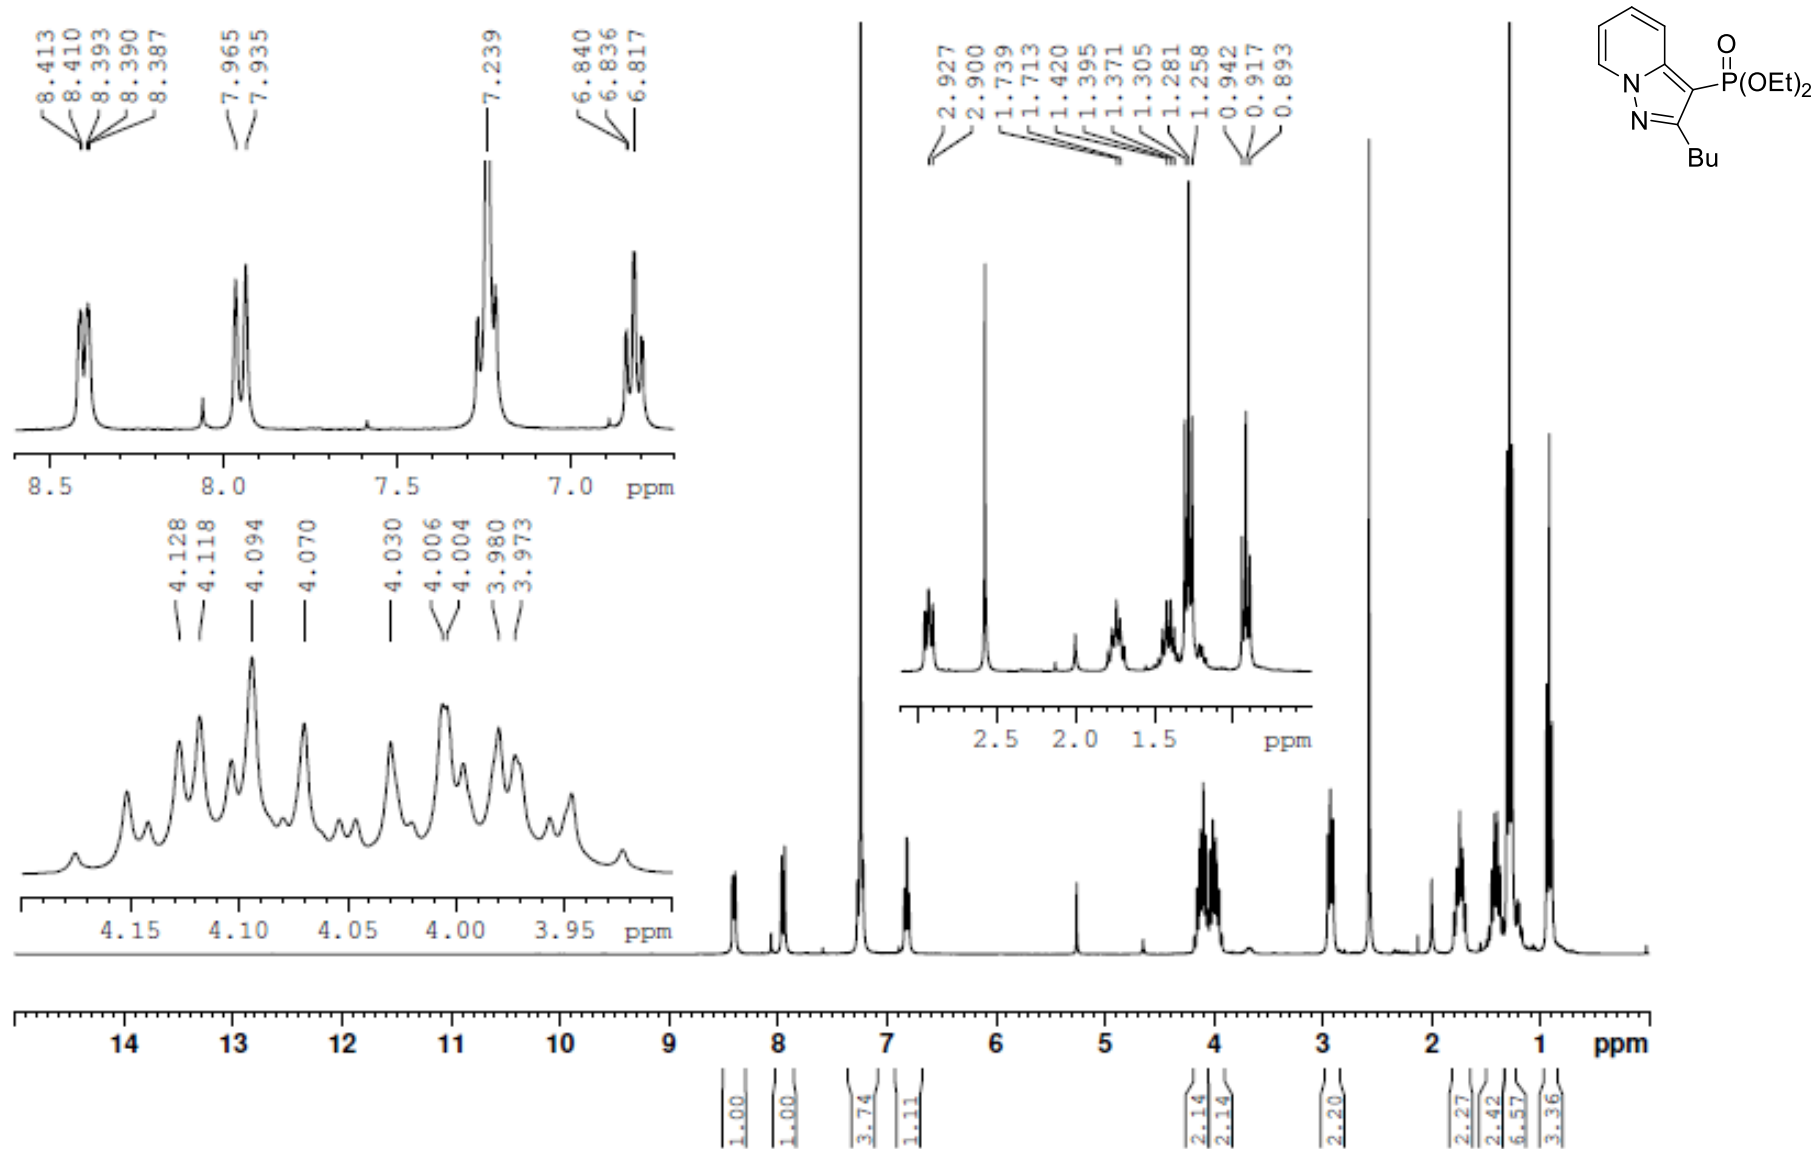

**Diethyl (2-butylpyrazolo[1,5-a]pyridin-3-yl)phosphonate (3g)  $^{13}\text{C}$  NMR.**

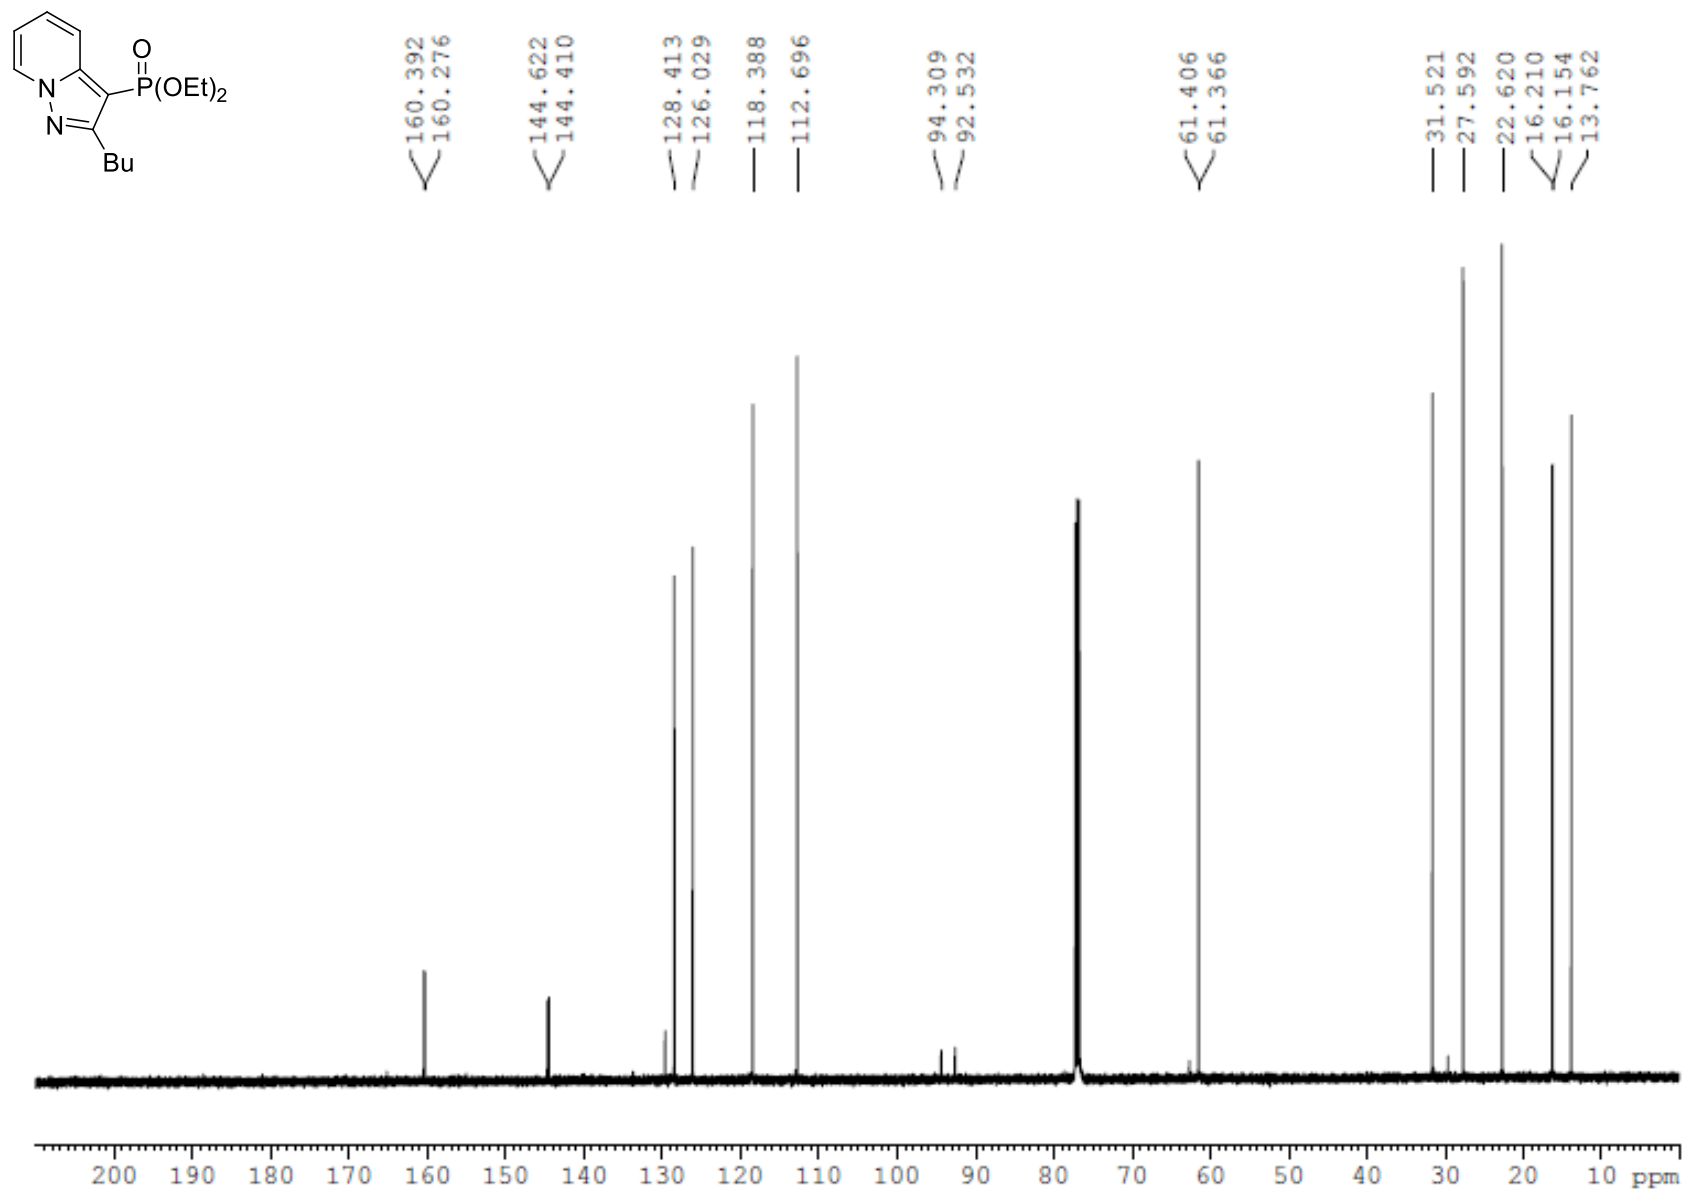

**Diethyl (2-butylpyrazolo[1,5-a]pyridin-3-yl)phosphonate (3g)  $^{31}\text{P}$  NMR.**

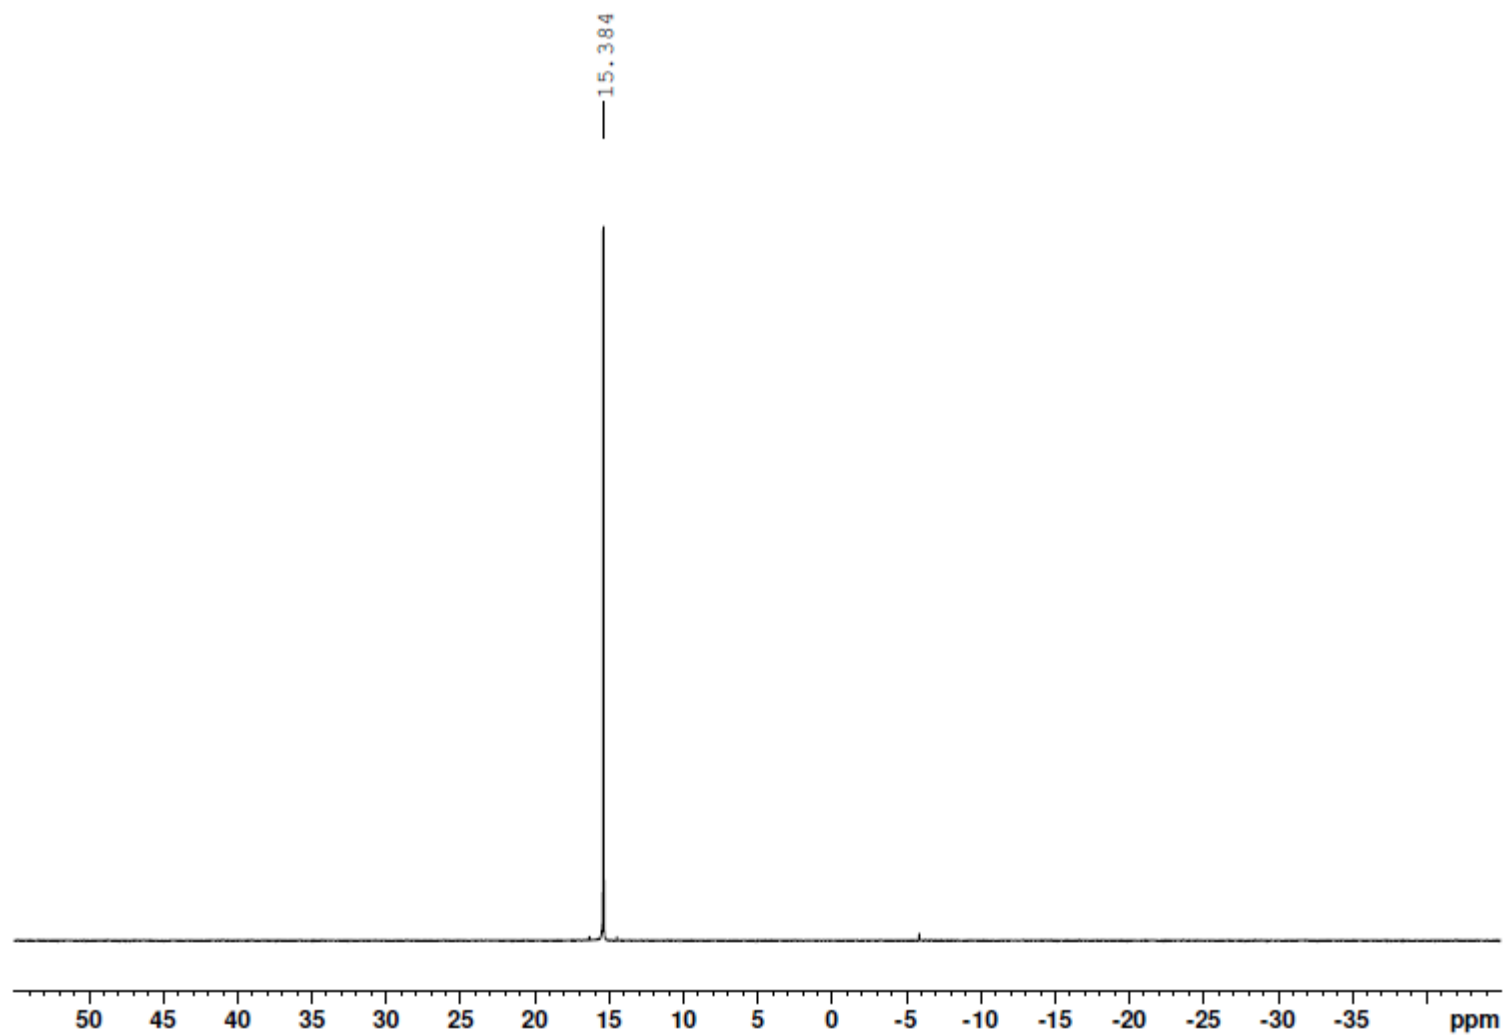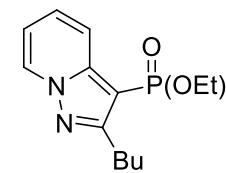

**Diethyl (2-*tert*-butylpyrazolo[1,5-*a*]pyridin-3-yl)phosphonate (3h)  $^1\text{H}$  NMR.**

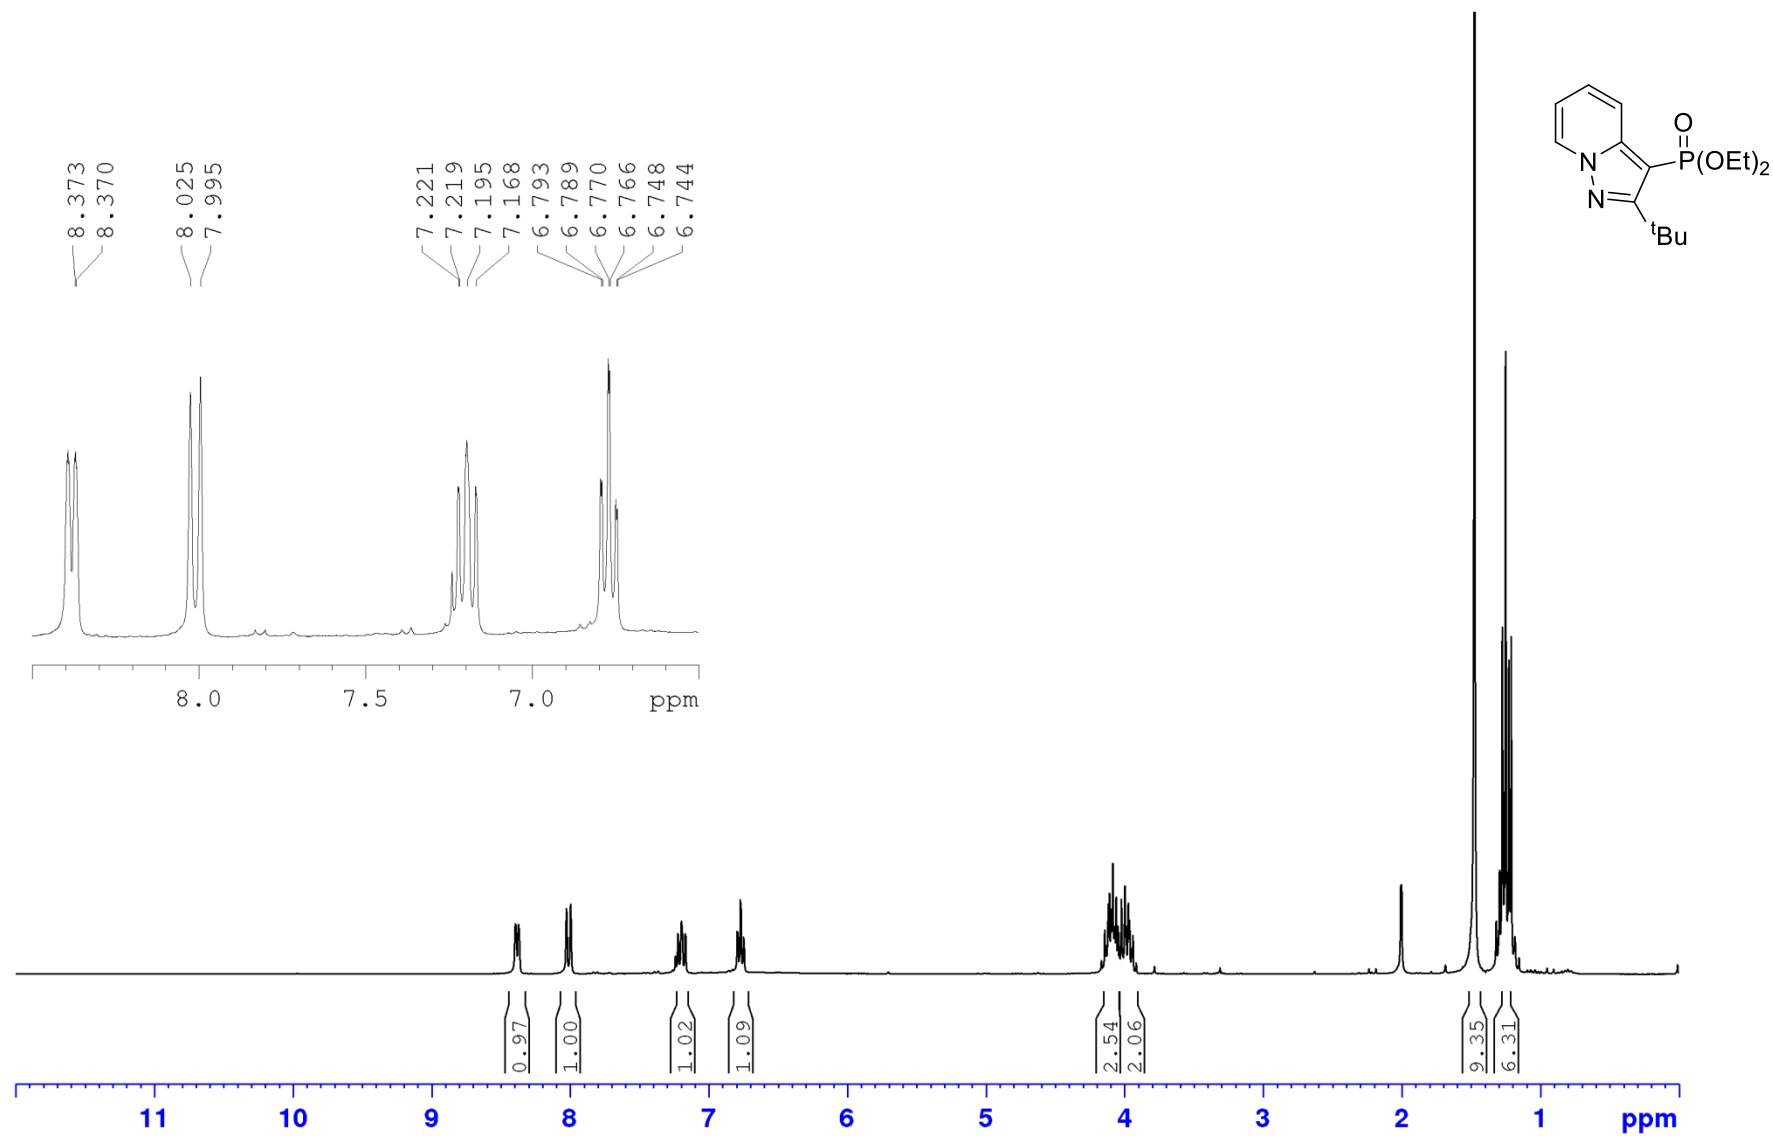



**Diethyl (2-*tert*-butylpyrazolo[1,5-*a*]pyridin-3-yl)phosphonate (3h)  $^{13}\text{C}$  NMR.**

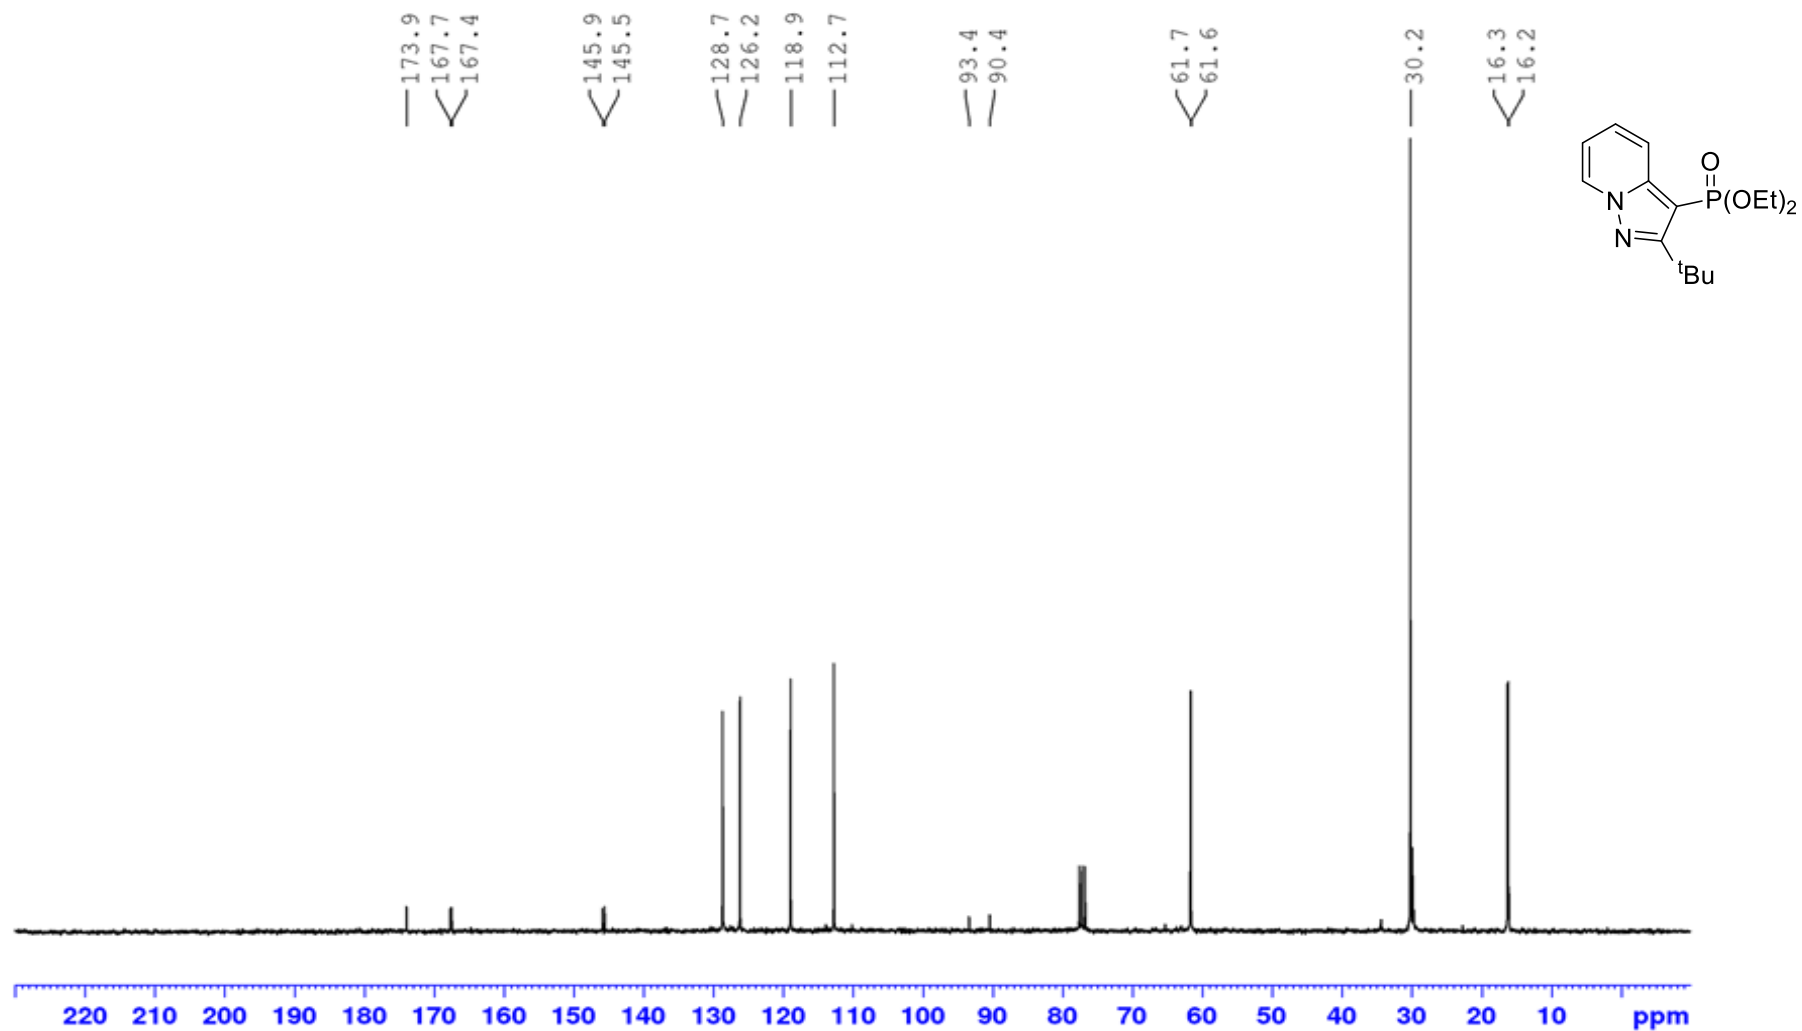

**Diethyl (2-*tert*-butylpyrazolo[1,5-*a*]pyridin-3-yl)phosphonate (3h)  $^{31}\text{P}$  NMR.**

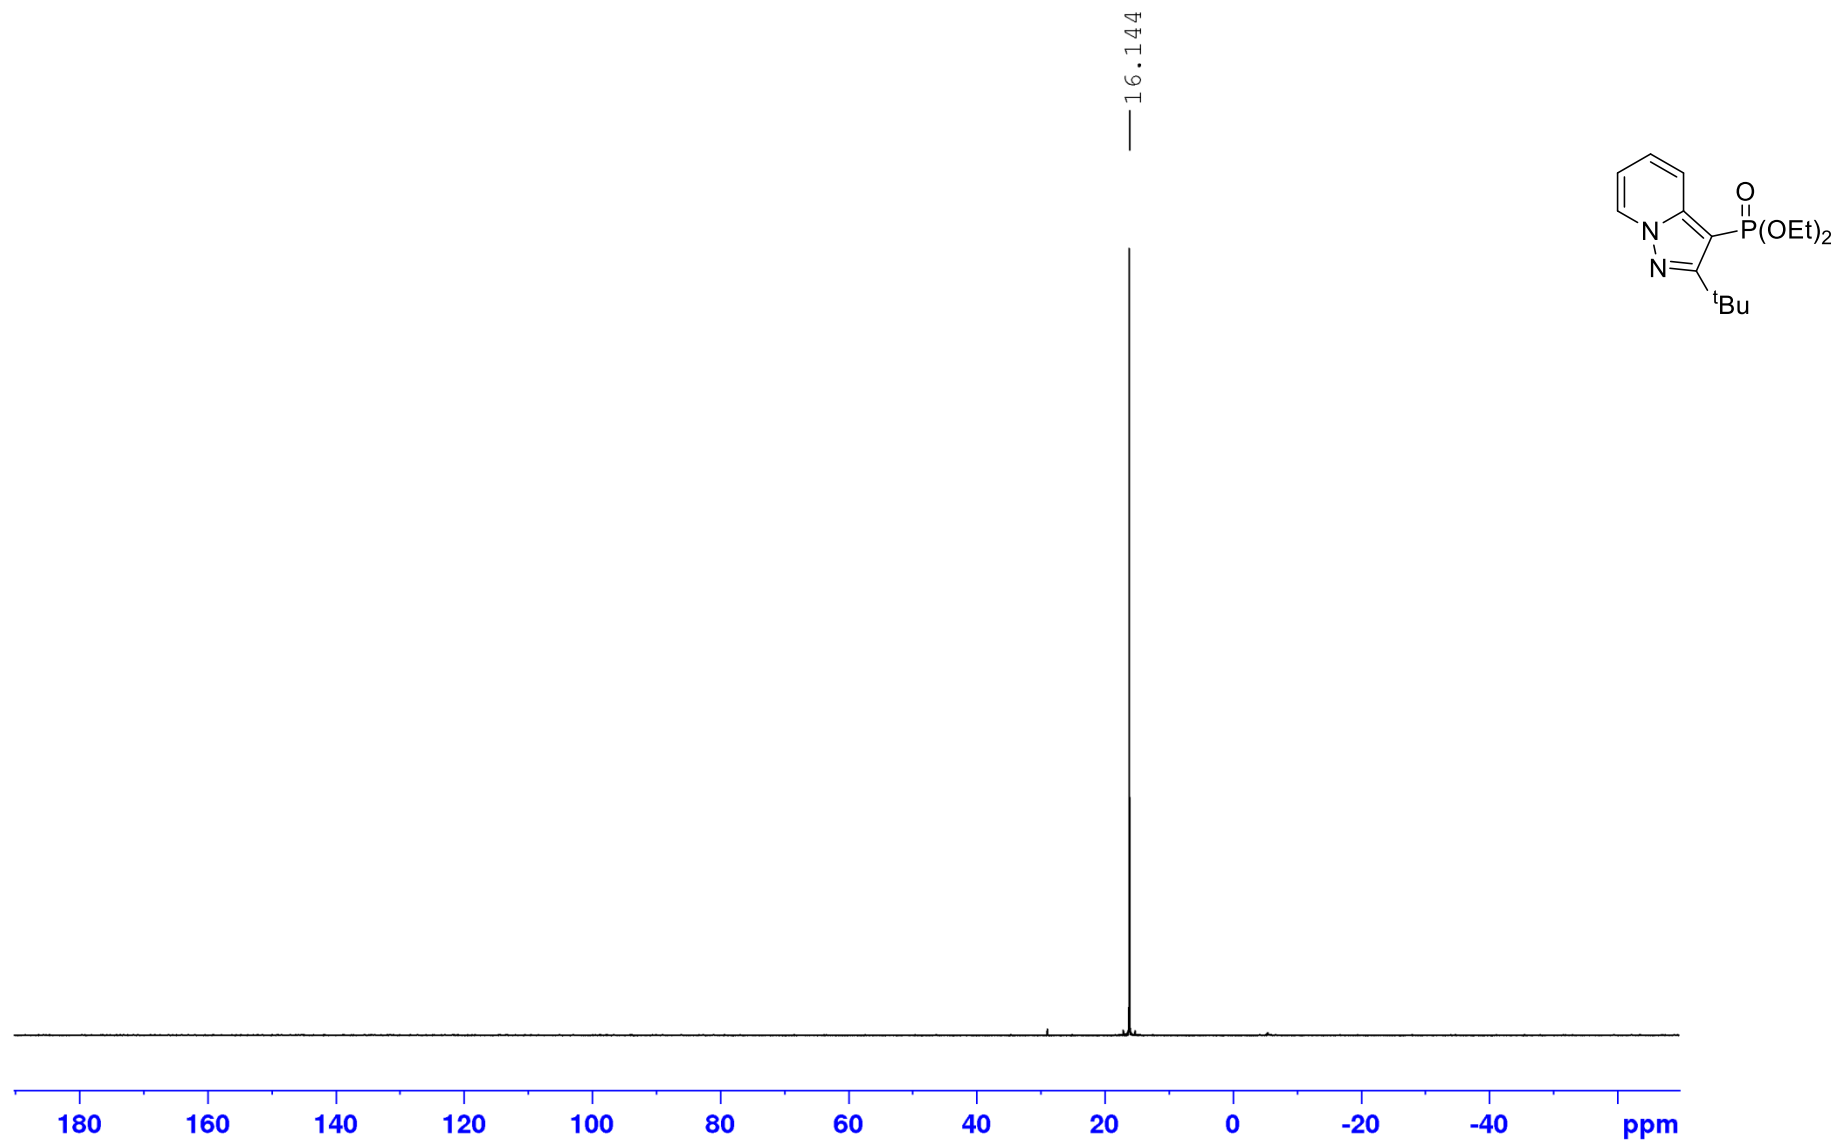

**Diethyl (2-cyclopropylpyrazolo[1,5-a]pyridin-3-yl)phosphonate  $^1\text{H}$  NMR(3i).**

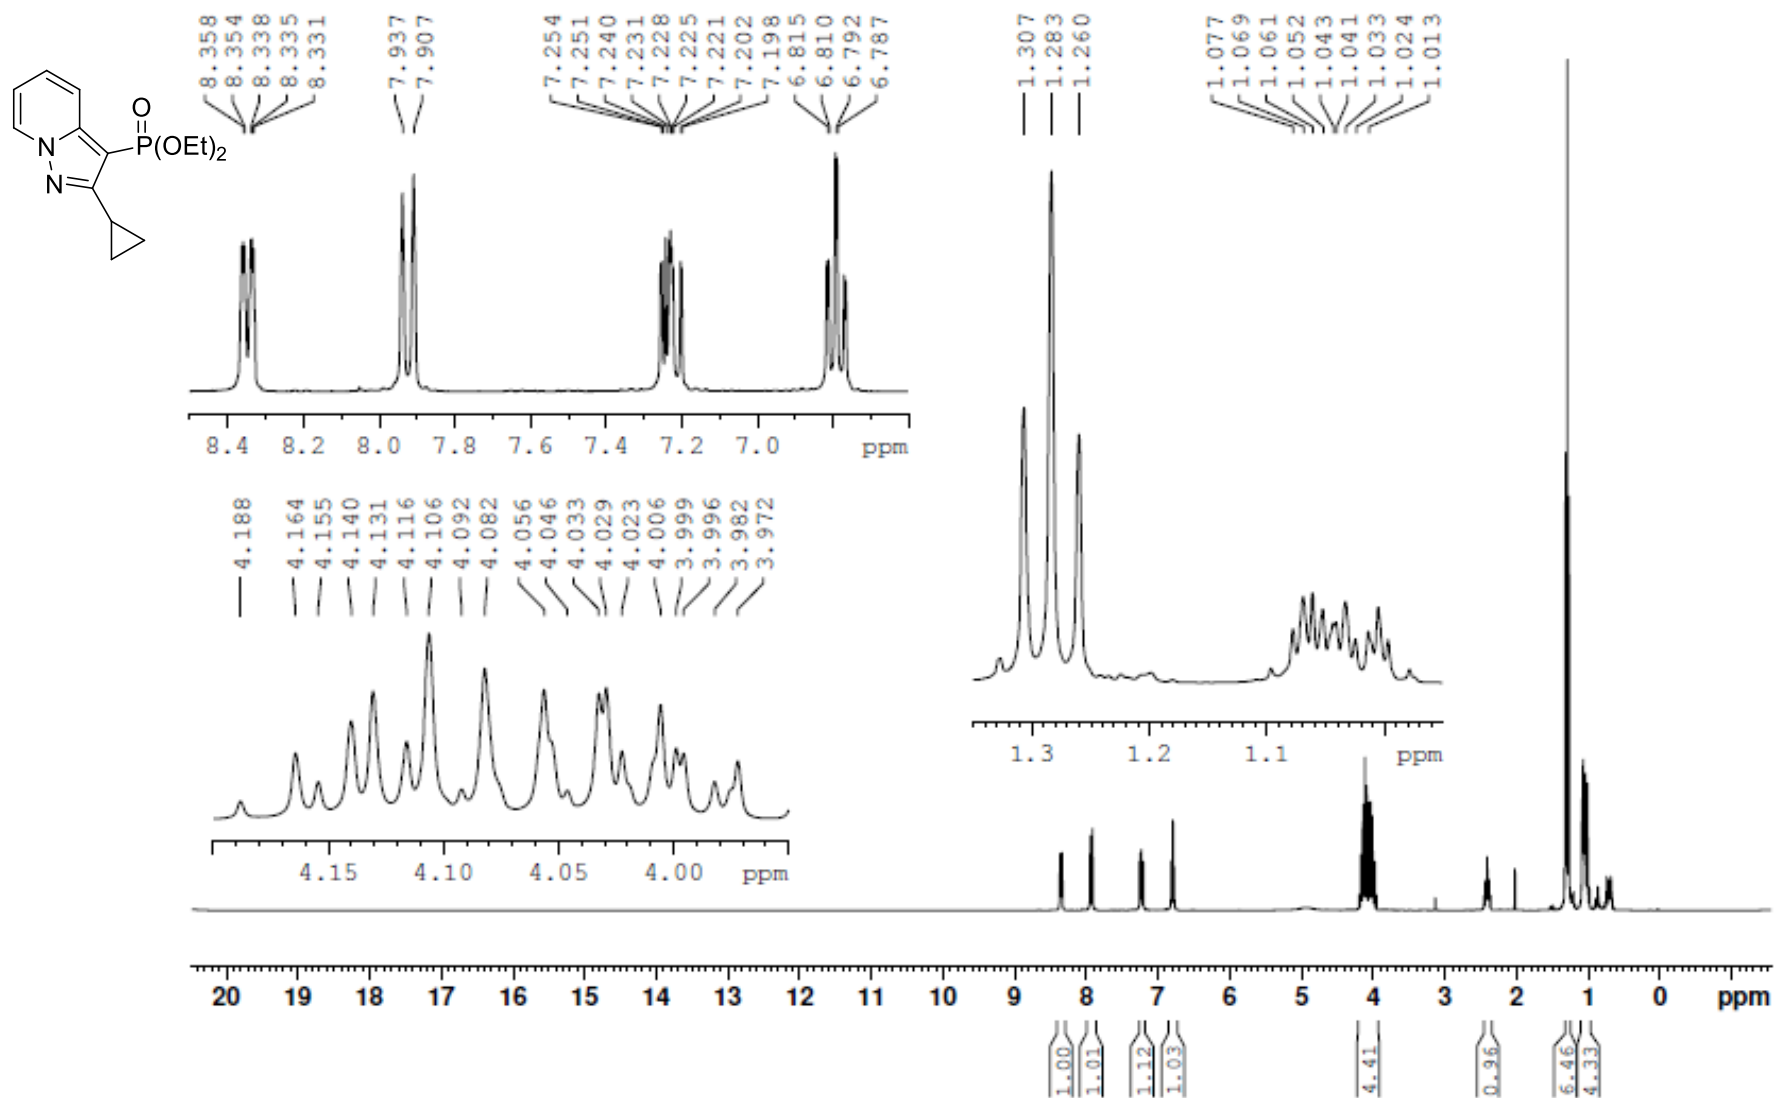

**Diethyl (2-cyclopropylpyrazolo[1,5-a]pyridin-3-yl)phosphonate <sup>13</sup>C NMR(3i).**

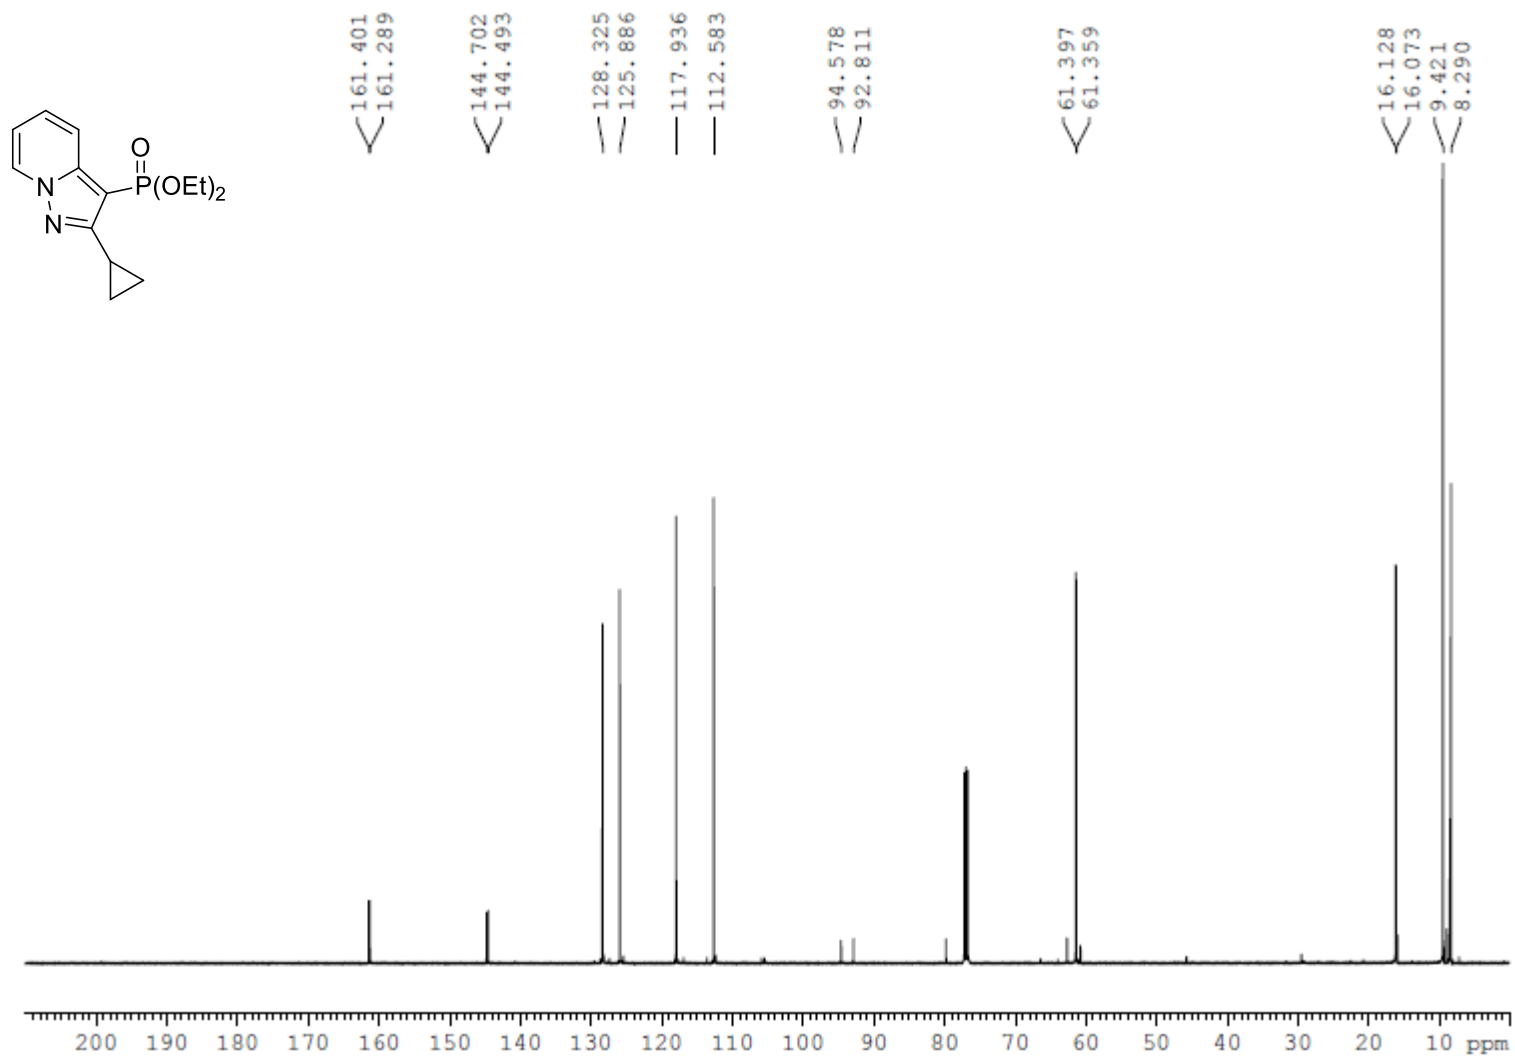

**Diethyl (2-cyclopropylpyrazolo[1,5-a]pyridin-3-yl)phosphonate  $^{31}\text{P}$  NMR(3i).**

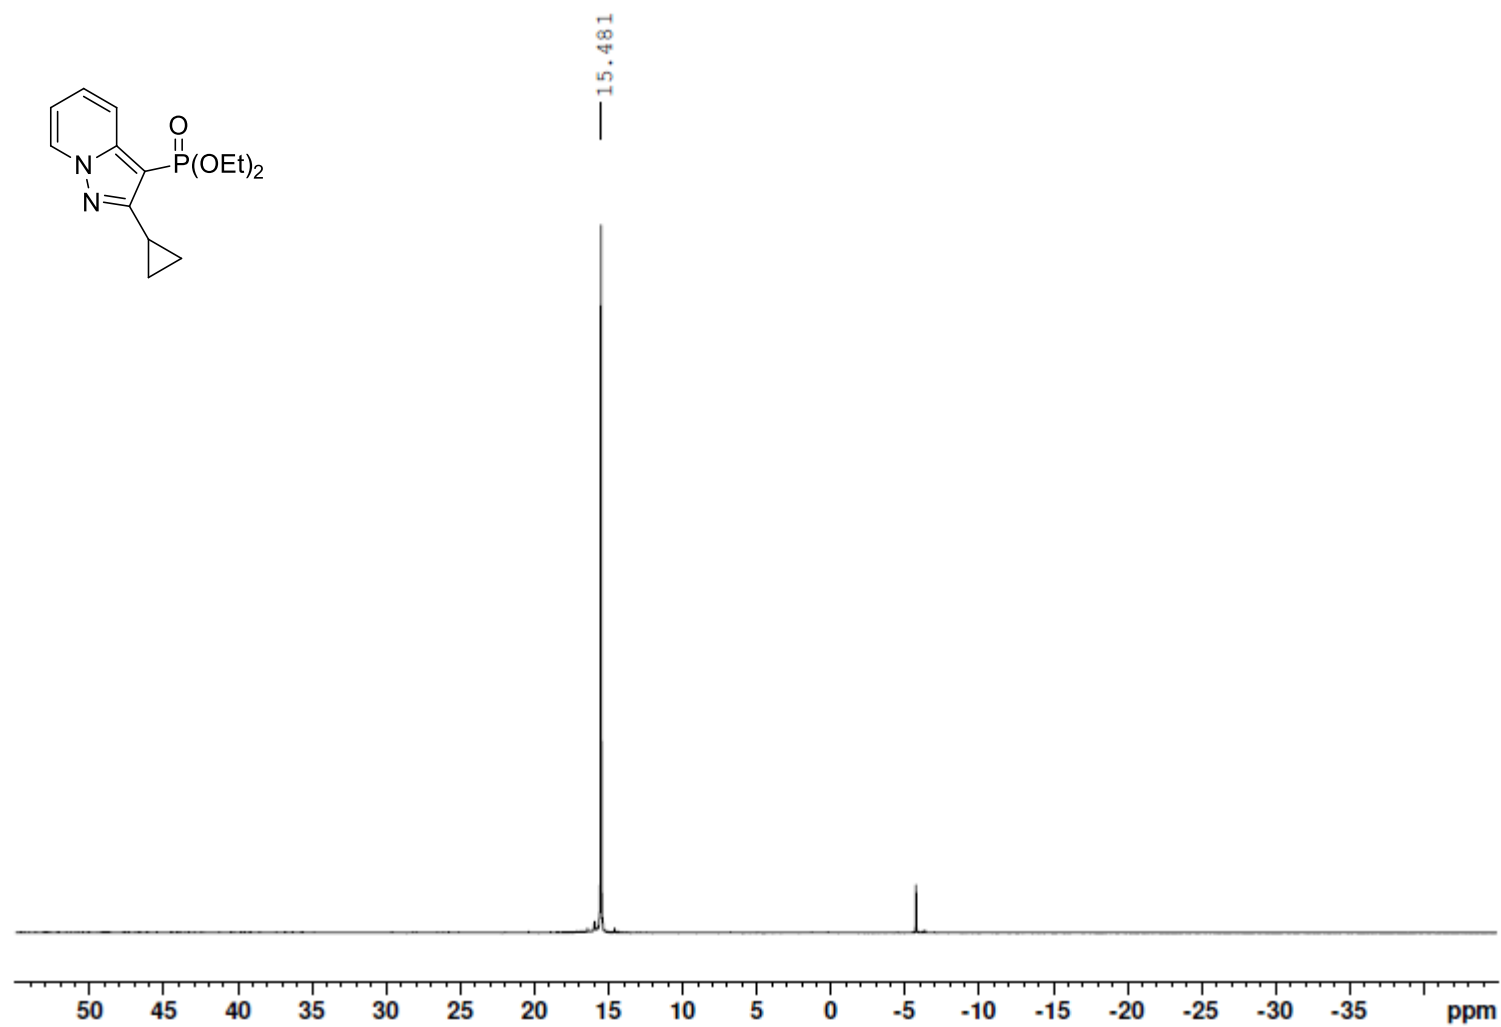

**Diethyl (2-methyl[1,5-a]pyridin-3-yl)phosphonate  $^1\text{H}$  NMR (3j).**

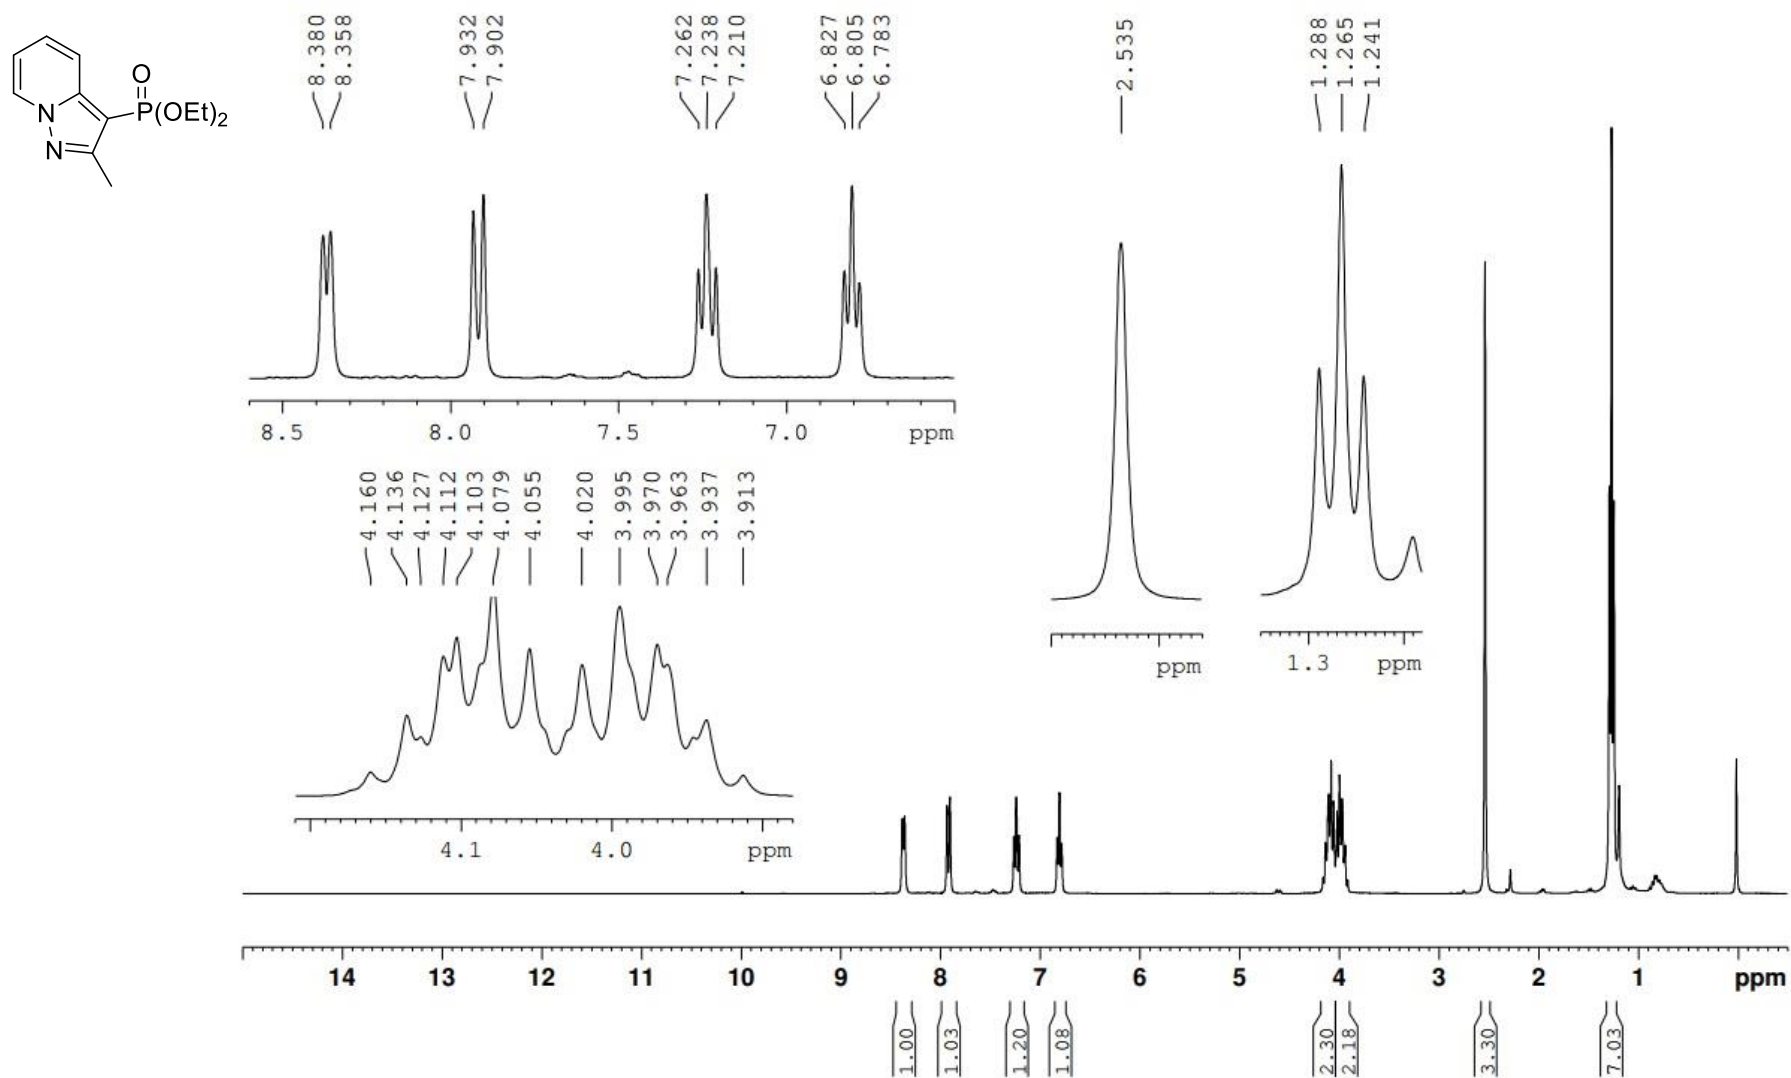

Diethyl (2-methyl[1,5-a]pyridin-3-yl)phosphonate  $^{13}\text{C}$  NMR (3j).

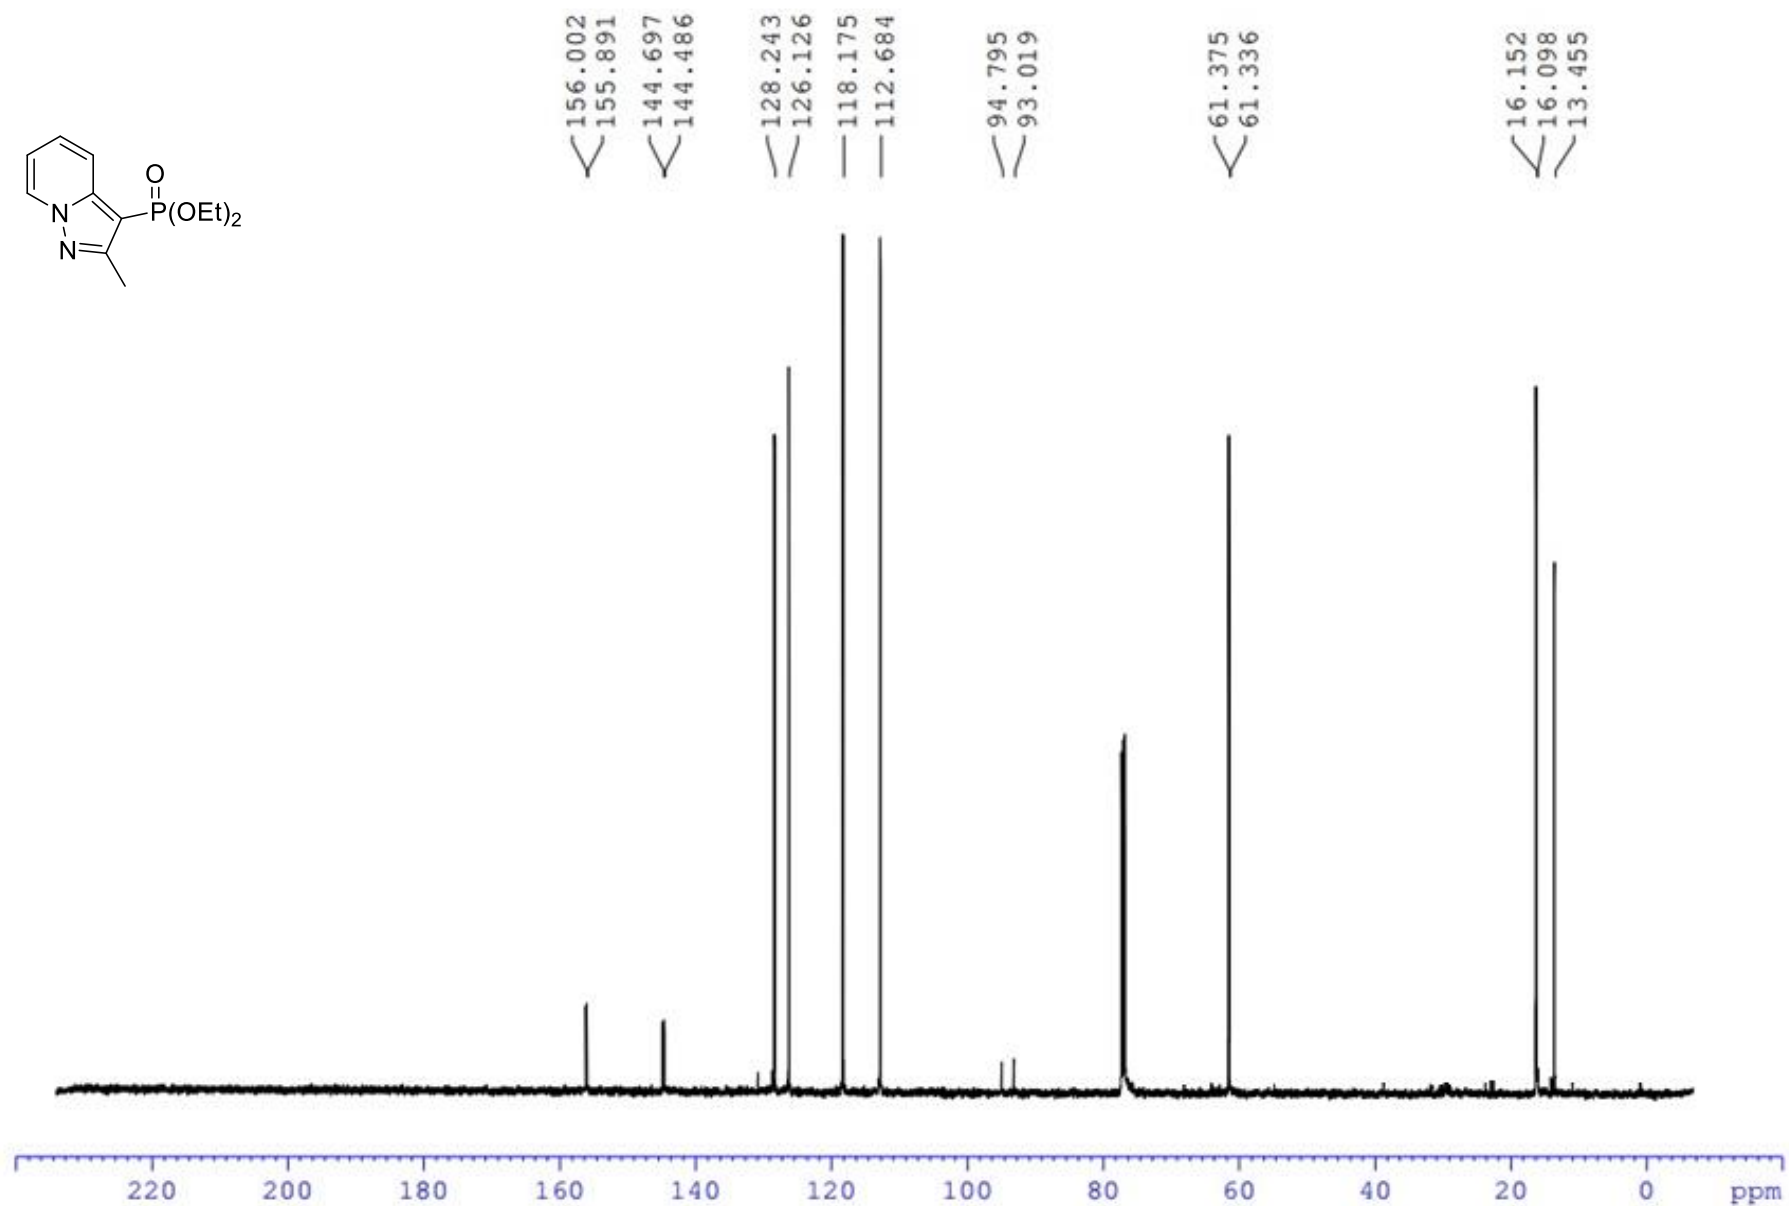

**Diethyl (2-methyl[1,5-a]pyridin-3-yl)phosphonate  $^{31}\text{P}$  NMR (3j).**

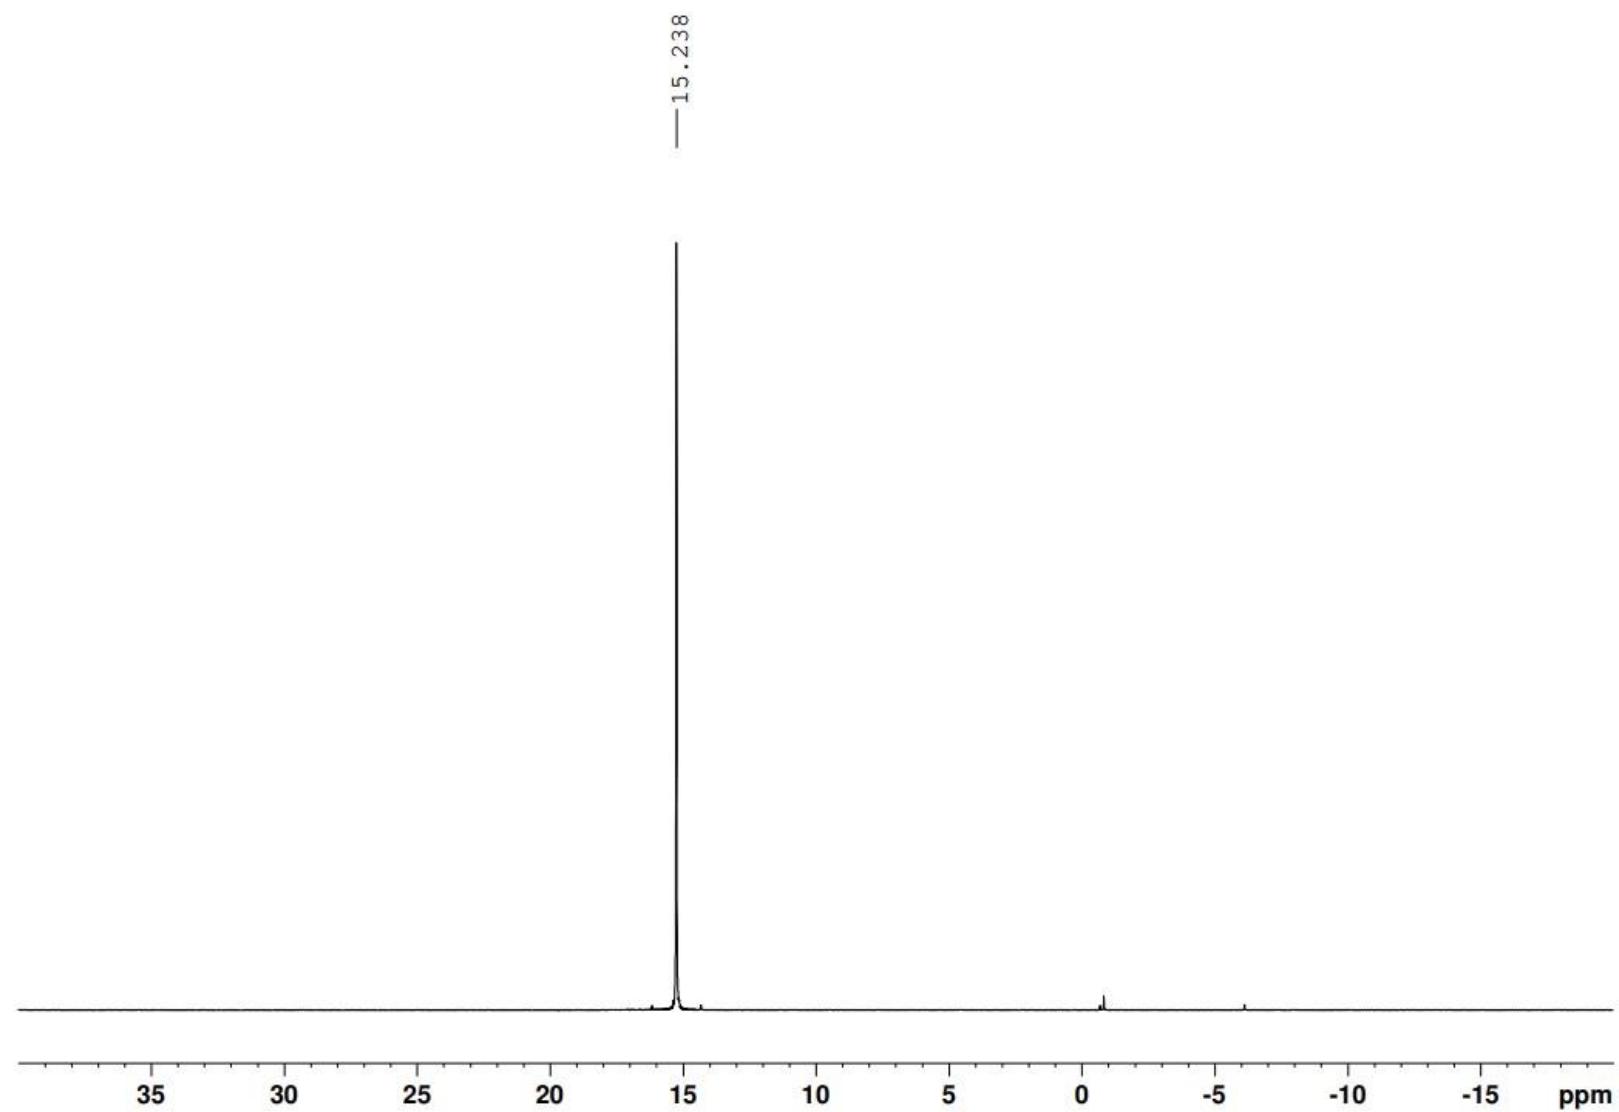



Diethyl (2-(2-hydroxypropan-2-yl)pyrazolo[1,5-a]pyridin-3-yl)phosphonate <sup>1</sup>H NMR (3k).

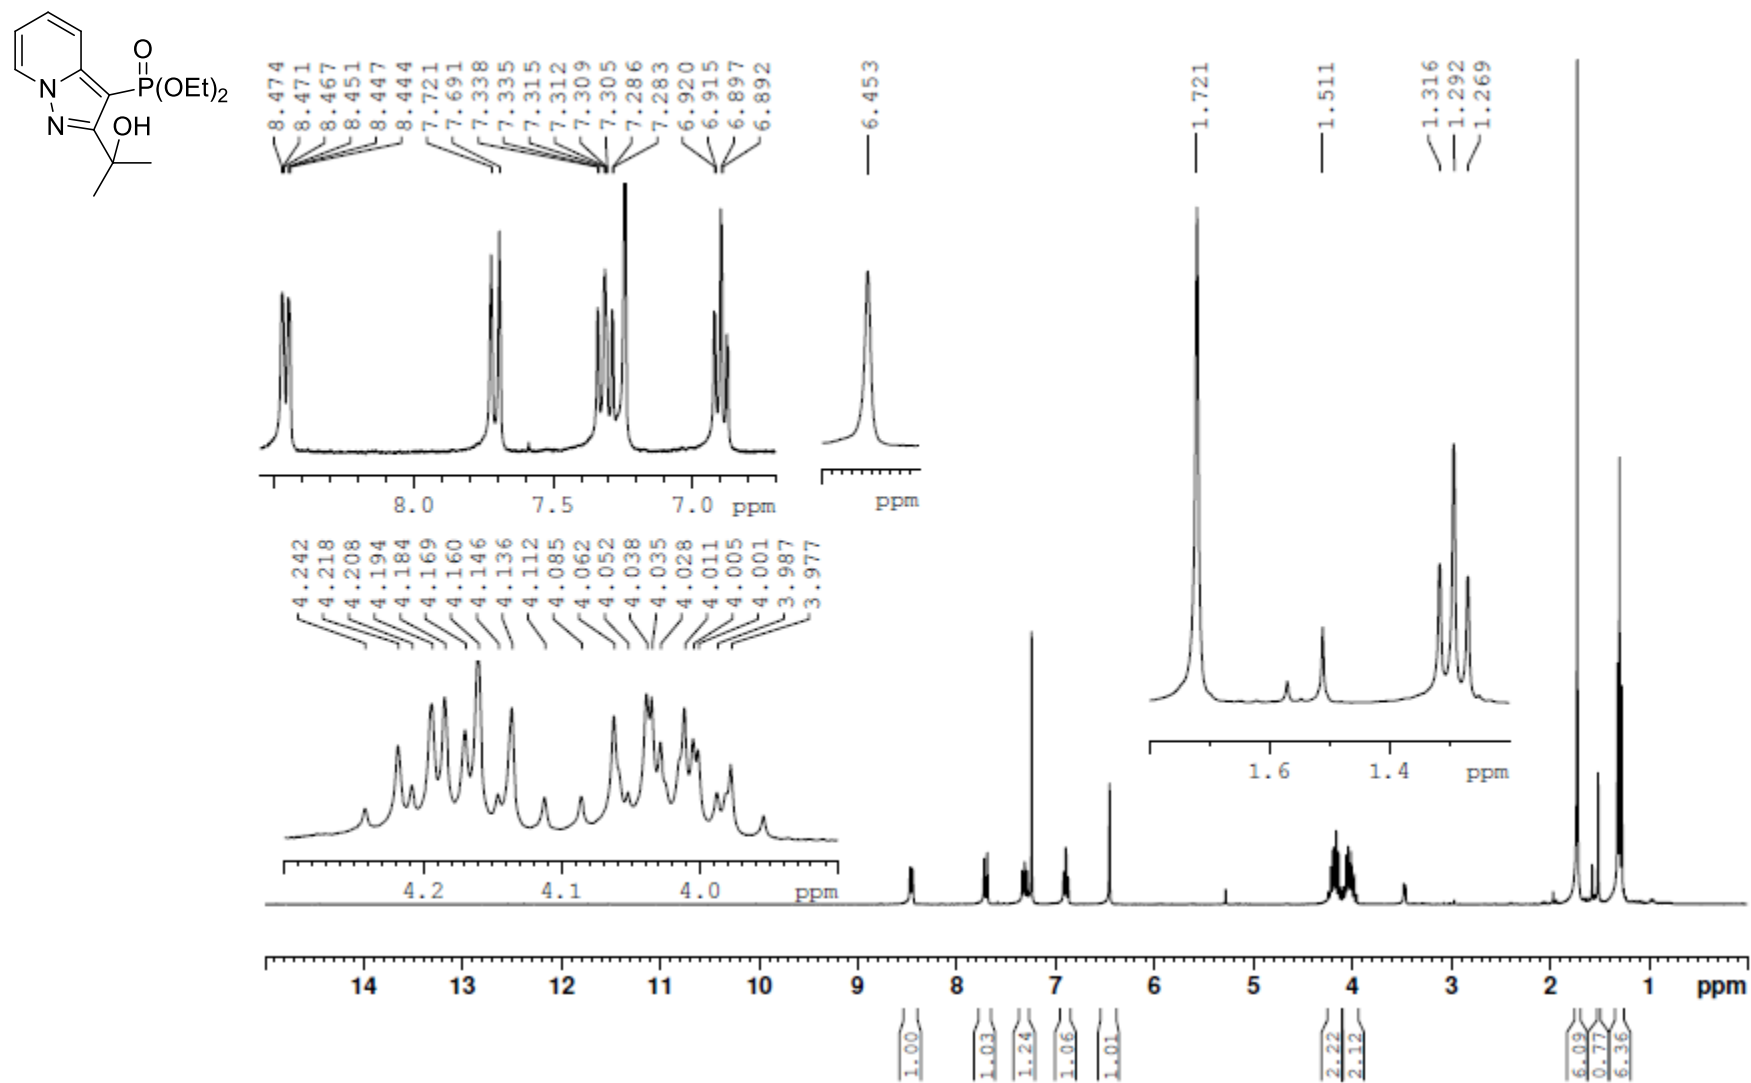

Diethyl (2-(2-hydroxypropan-2-yl)pyrazolo[1,5-a]pyridin-3-yl)phosphonate  $^{13}\text{C}$  NMR (3k).

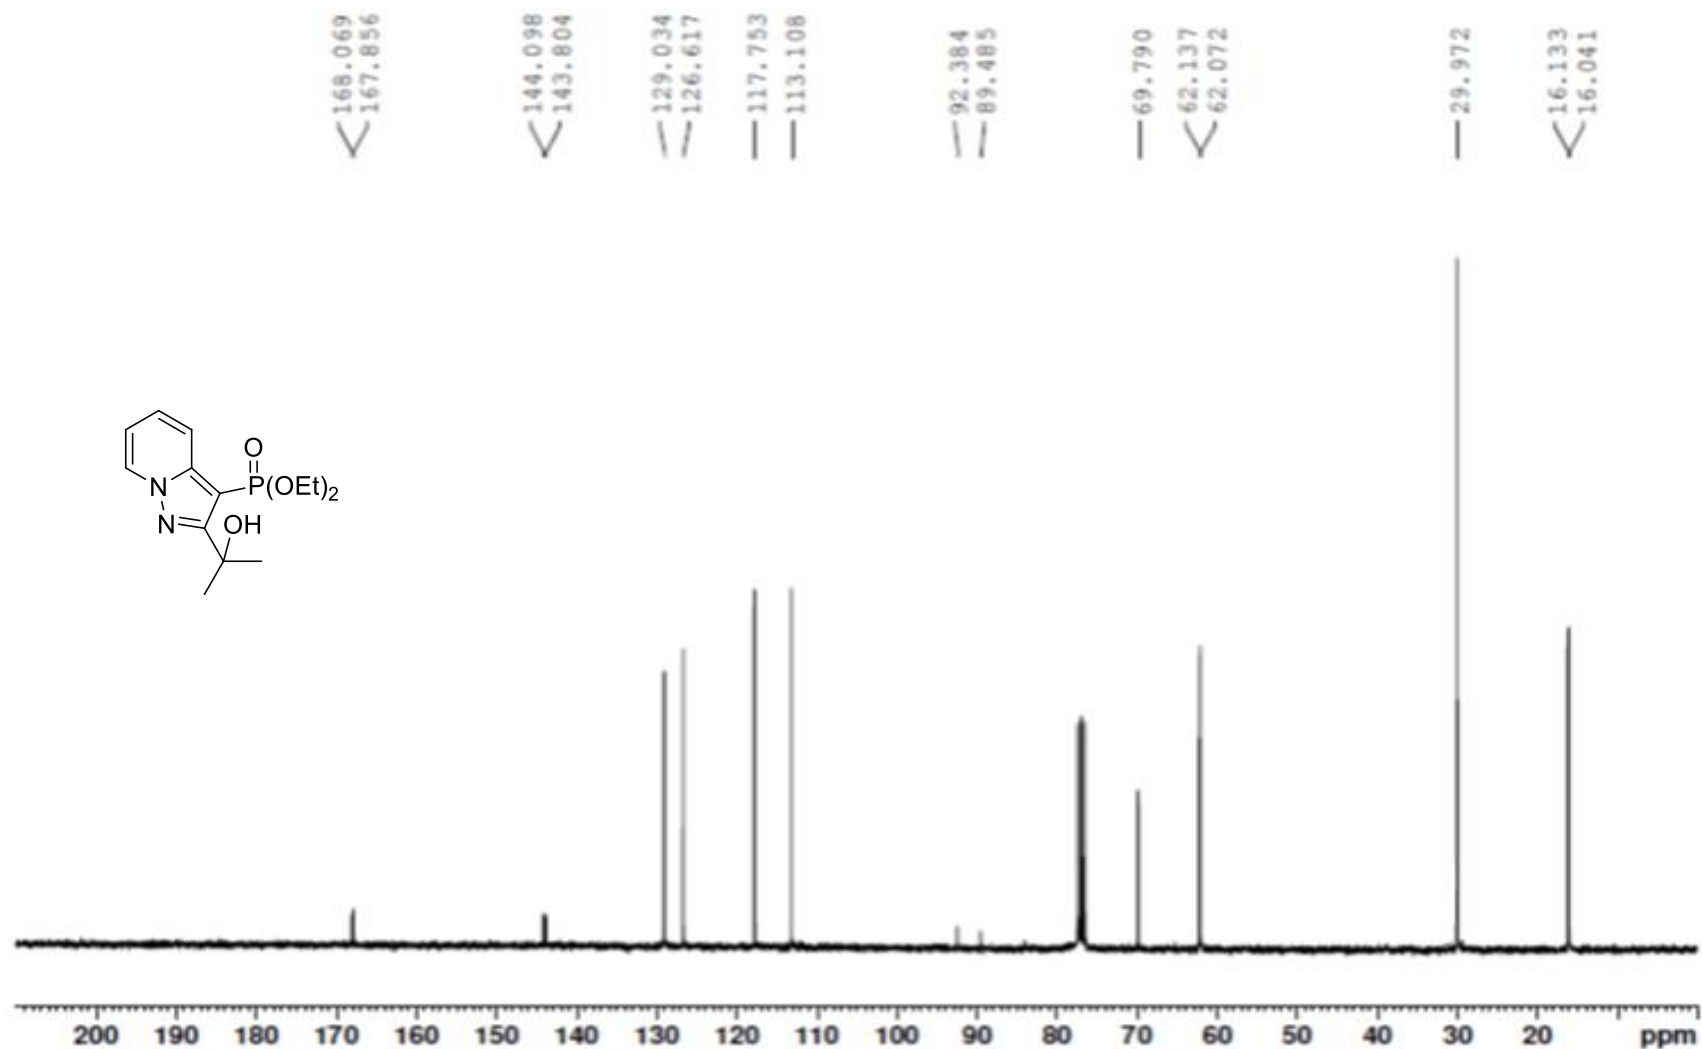

Diethyl (2-(2-hydroxypropan-2-yl)pyrazolo[1,5-a]pyridin-3-yl)phosphonate  $^{31}\text{P}$  NMR (3k).

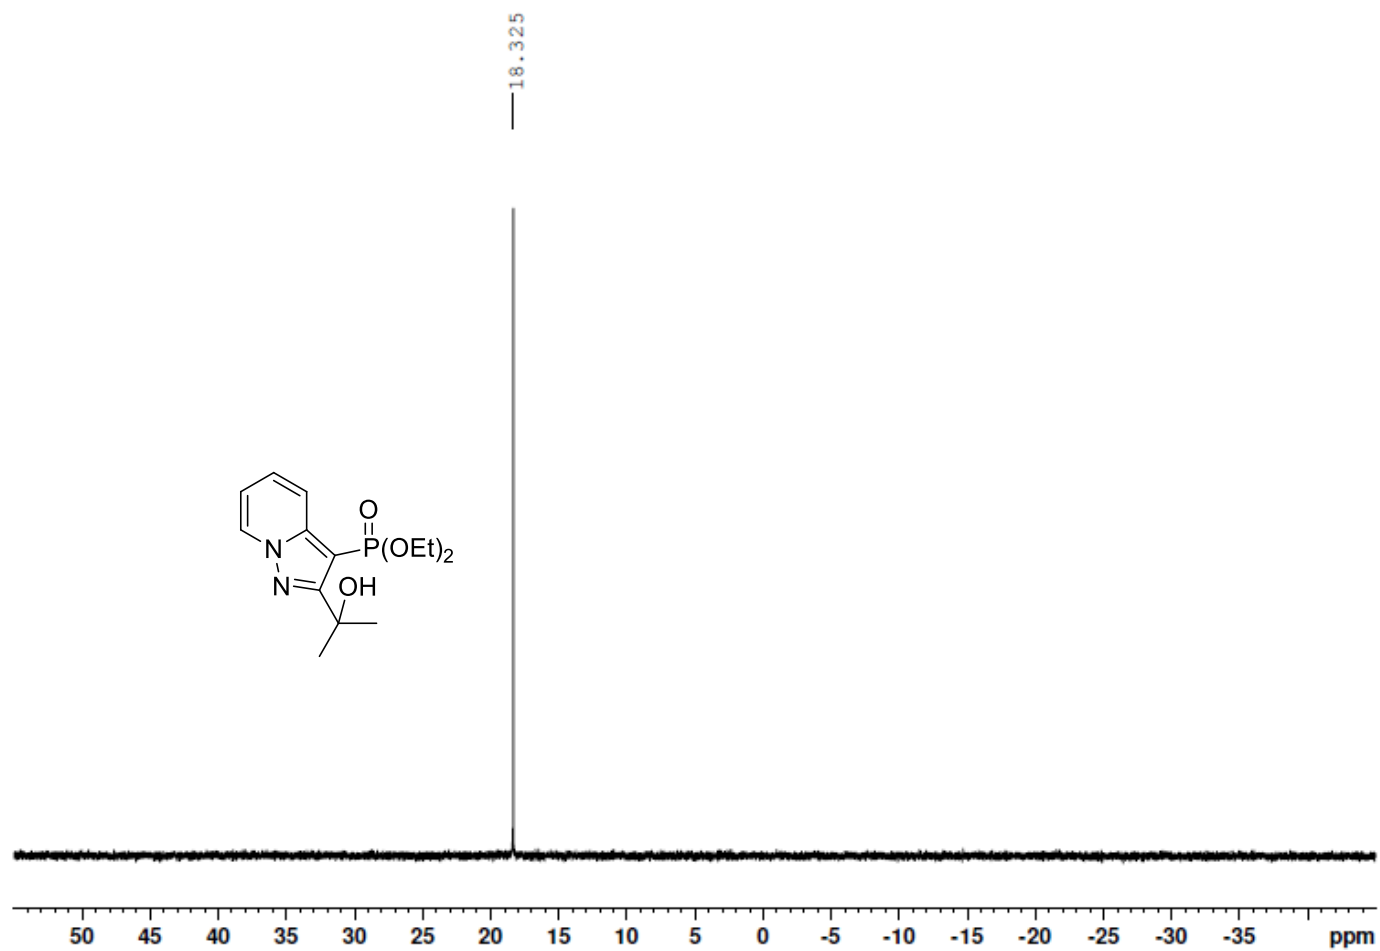

Diethyl (2-(1-hydroxycyclohexyl)pyrazolo[1,5-a]pyridin-3-yl)phosphonate <sup>1</sup>H NMR (3l).

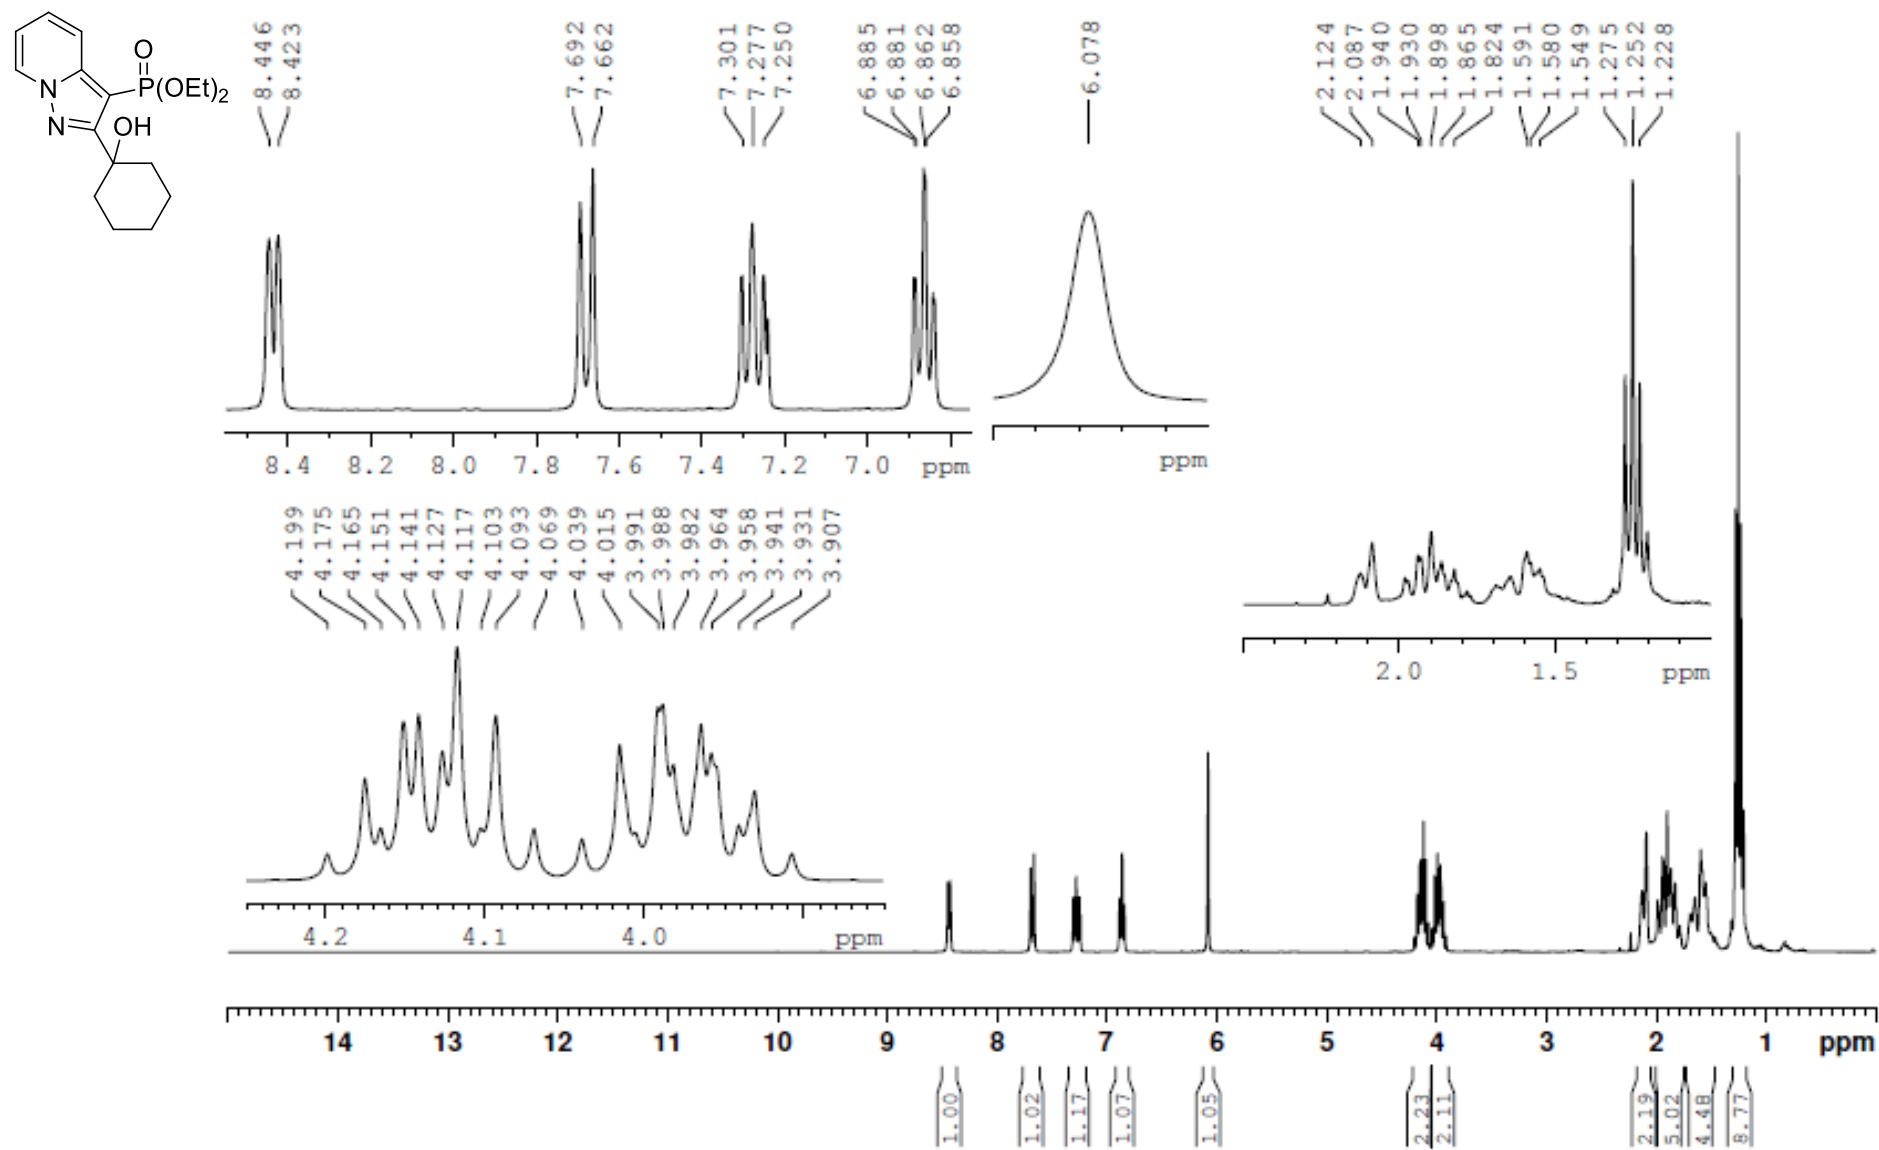

**Diethyl (2-(1-hydroxycyclohexyl)pyrazolo[1,5-a]pyridin-3-yl)phosphonate  $^{13}\text{C}$  NMR (3l).**

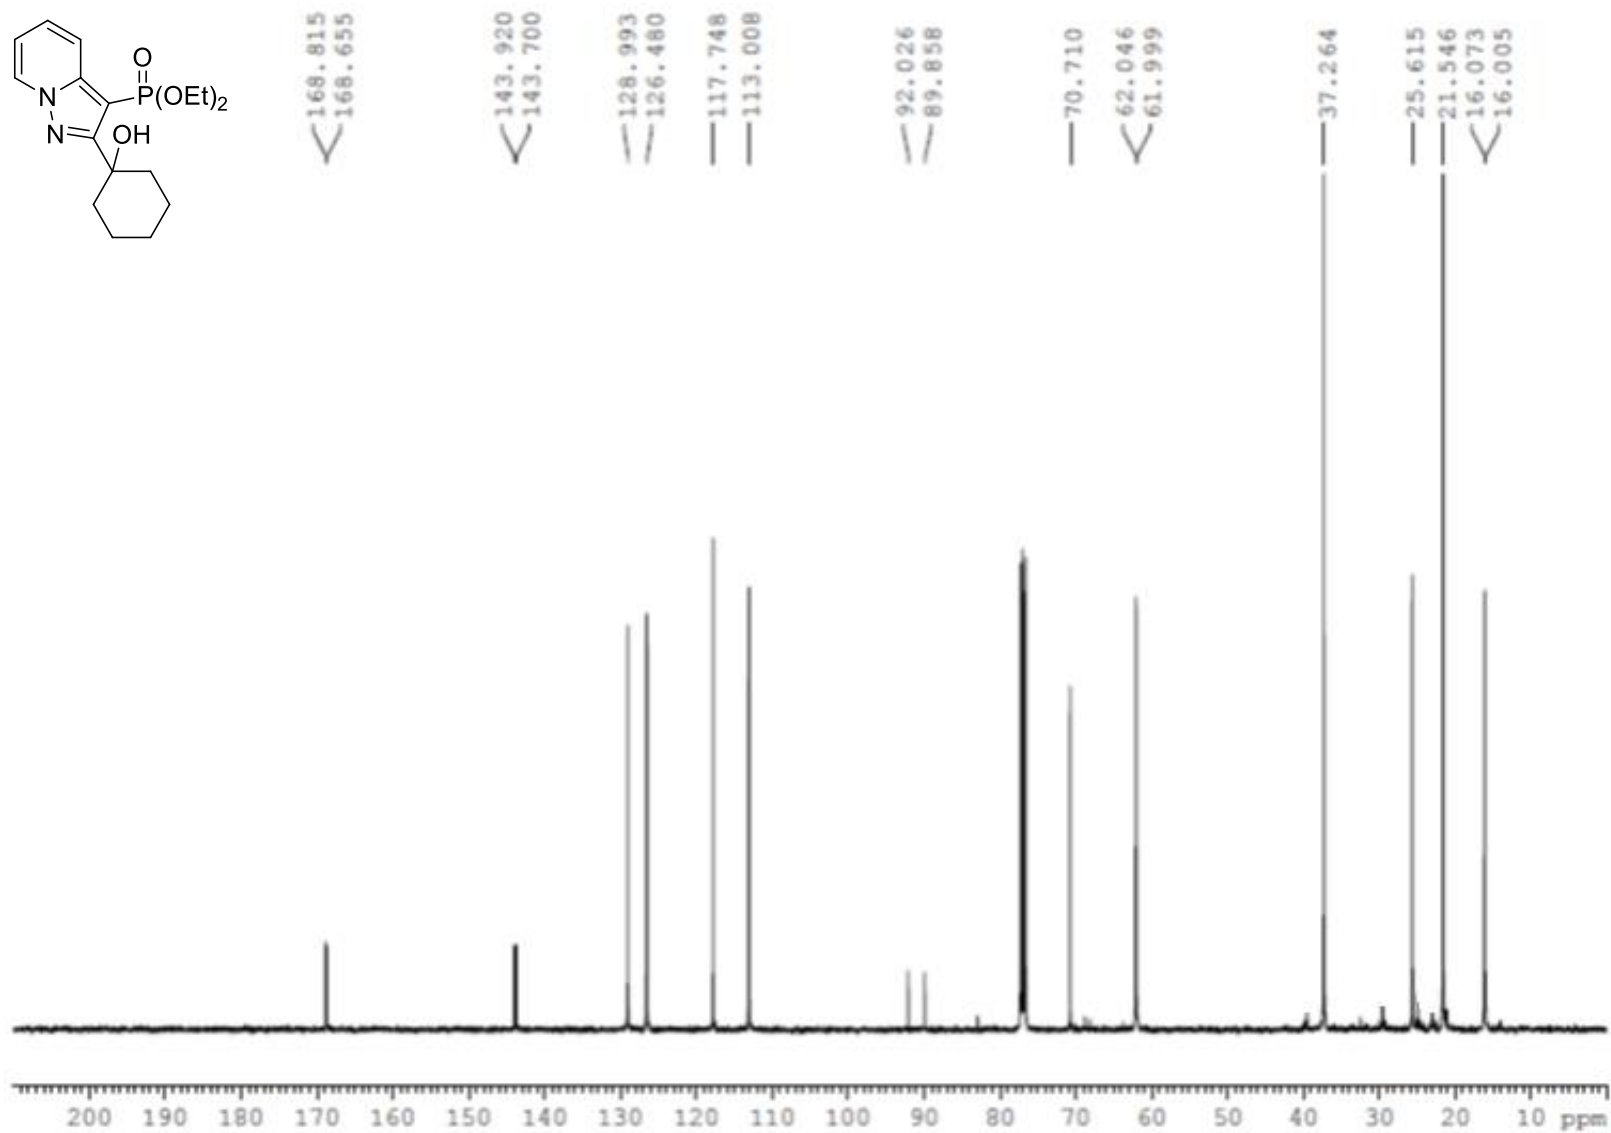

**Diethyl (2-(1-hydroxycyclohexyl)pyrazolo[1,5-a]pyridin-3-yl)phosphonate  $^{31}\text{P}$  NMR (3l).**

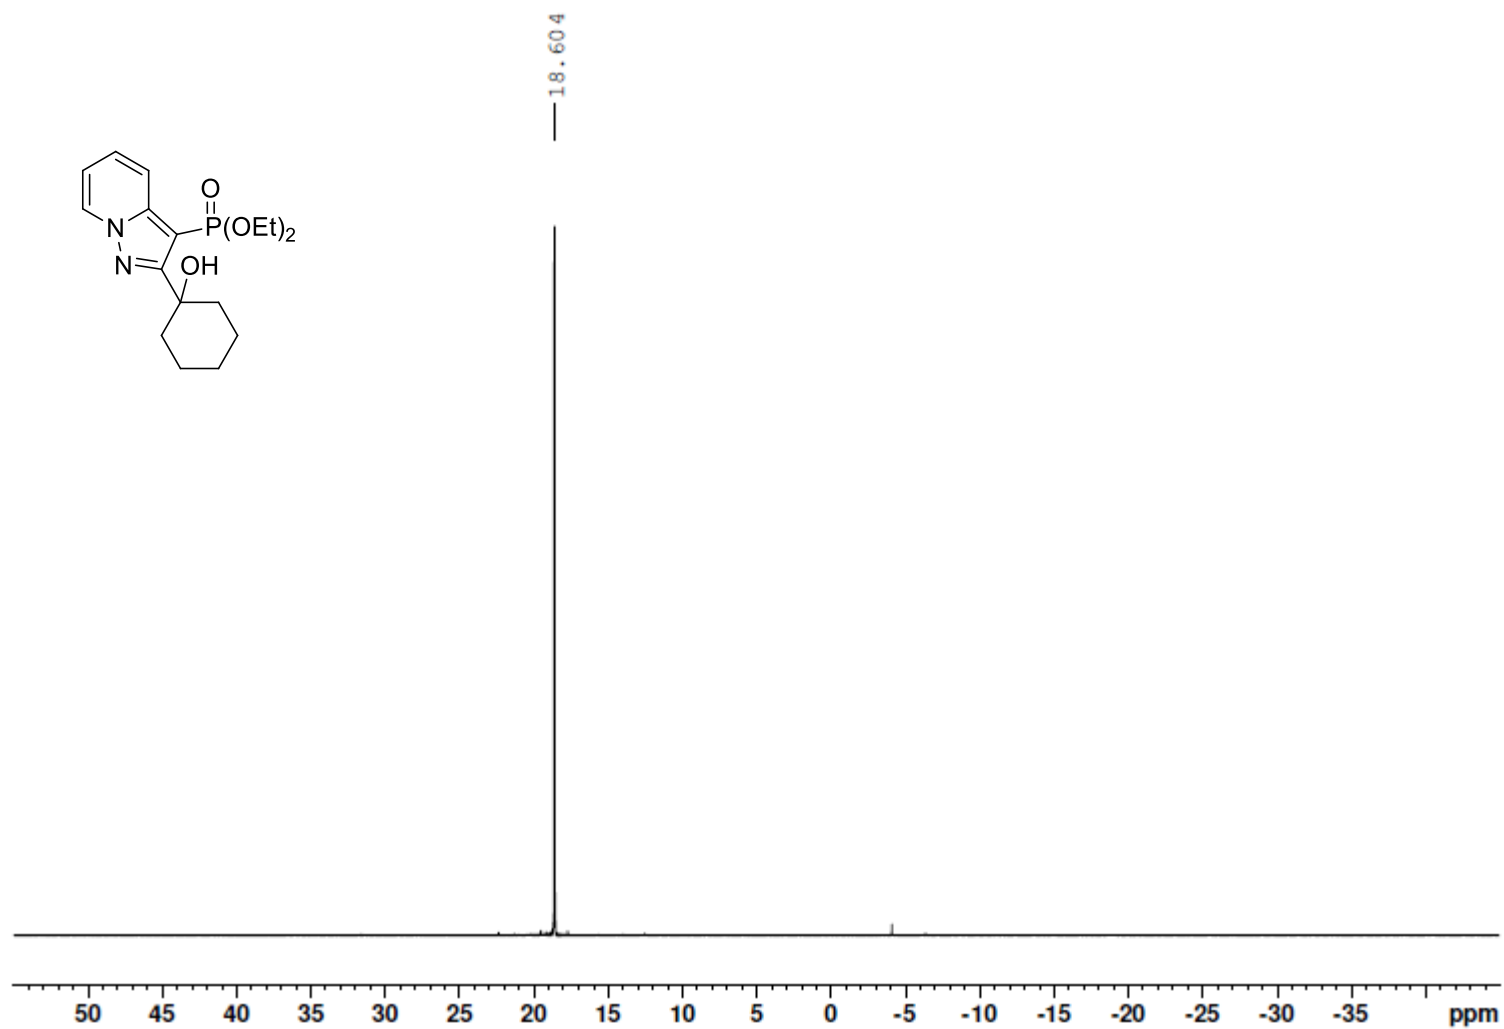

Tetraethyl pyrazolo[1,5-a]pyridine-2,3-diylbis(phosphonate) (5a)  $^1\text{H}$  NMR.

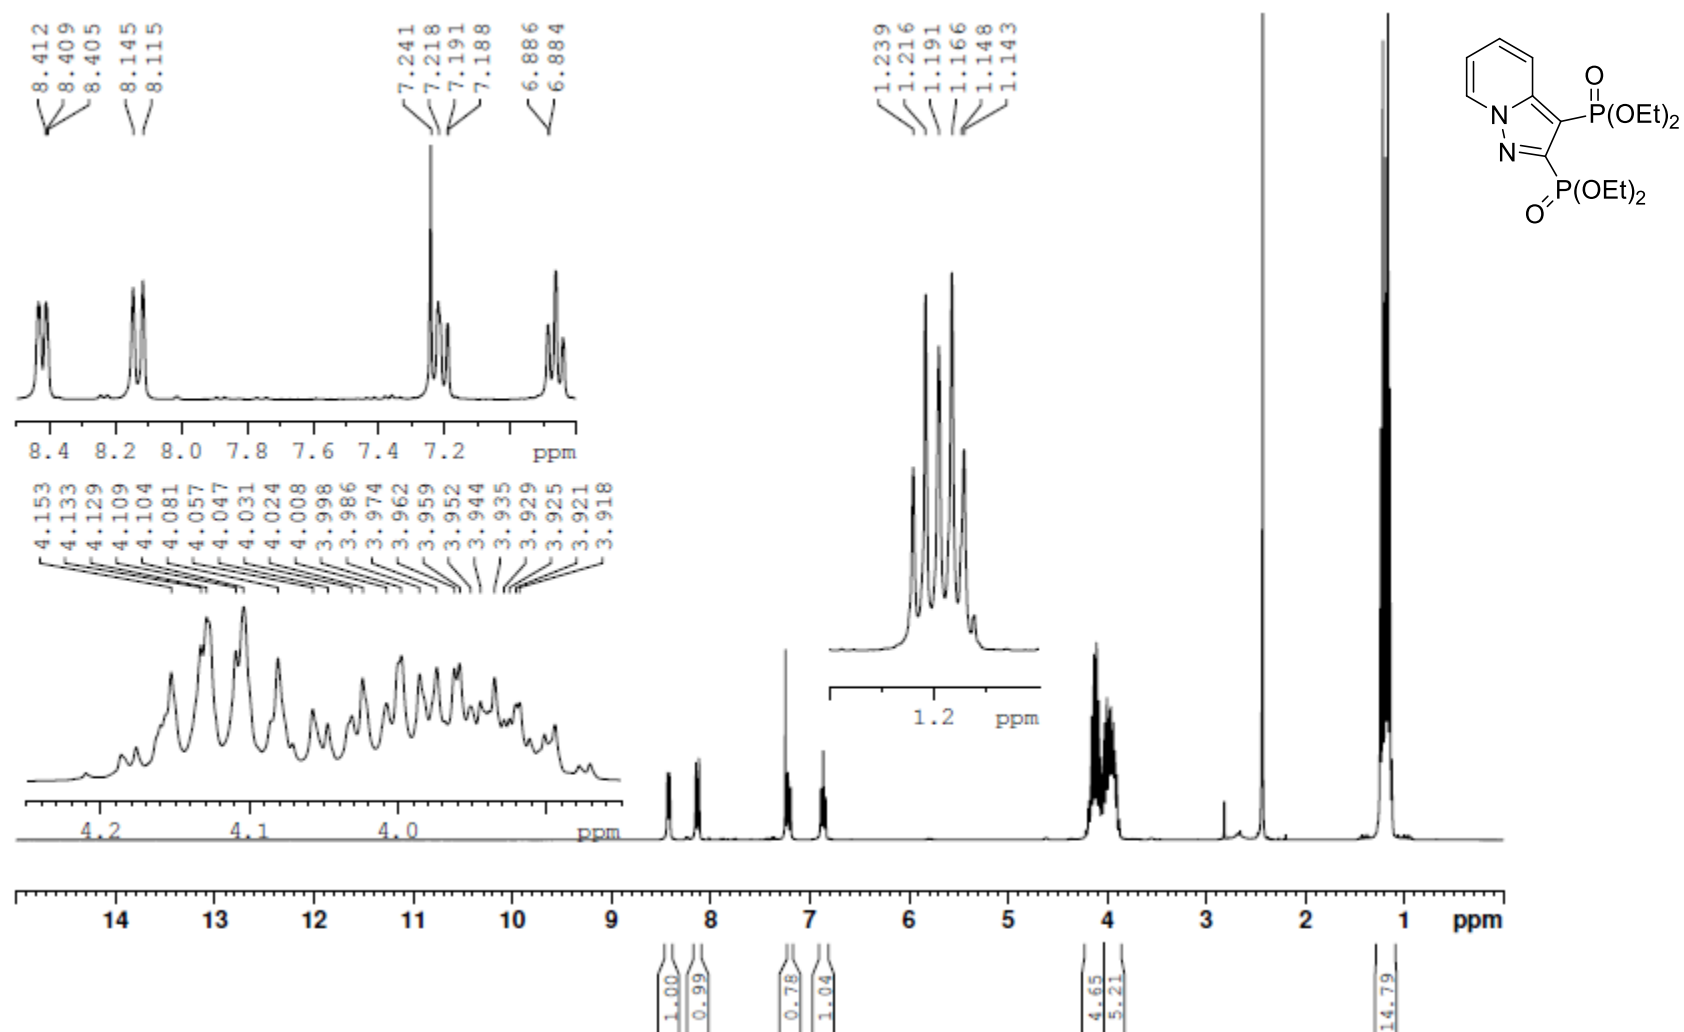

Tetraethyl pyrazolo[1,5-a]pyridine-2,3-diylbis(phosphonate) (5a)  $^{13}\text{C}$  NMR

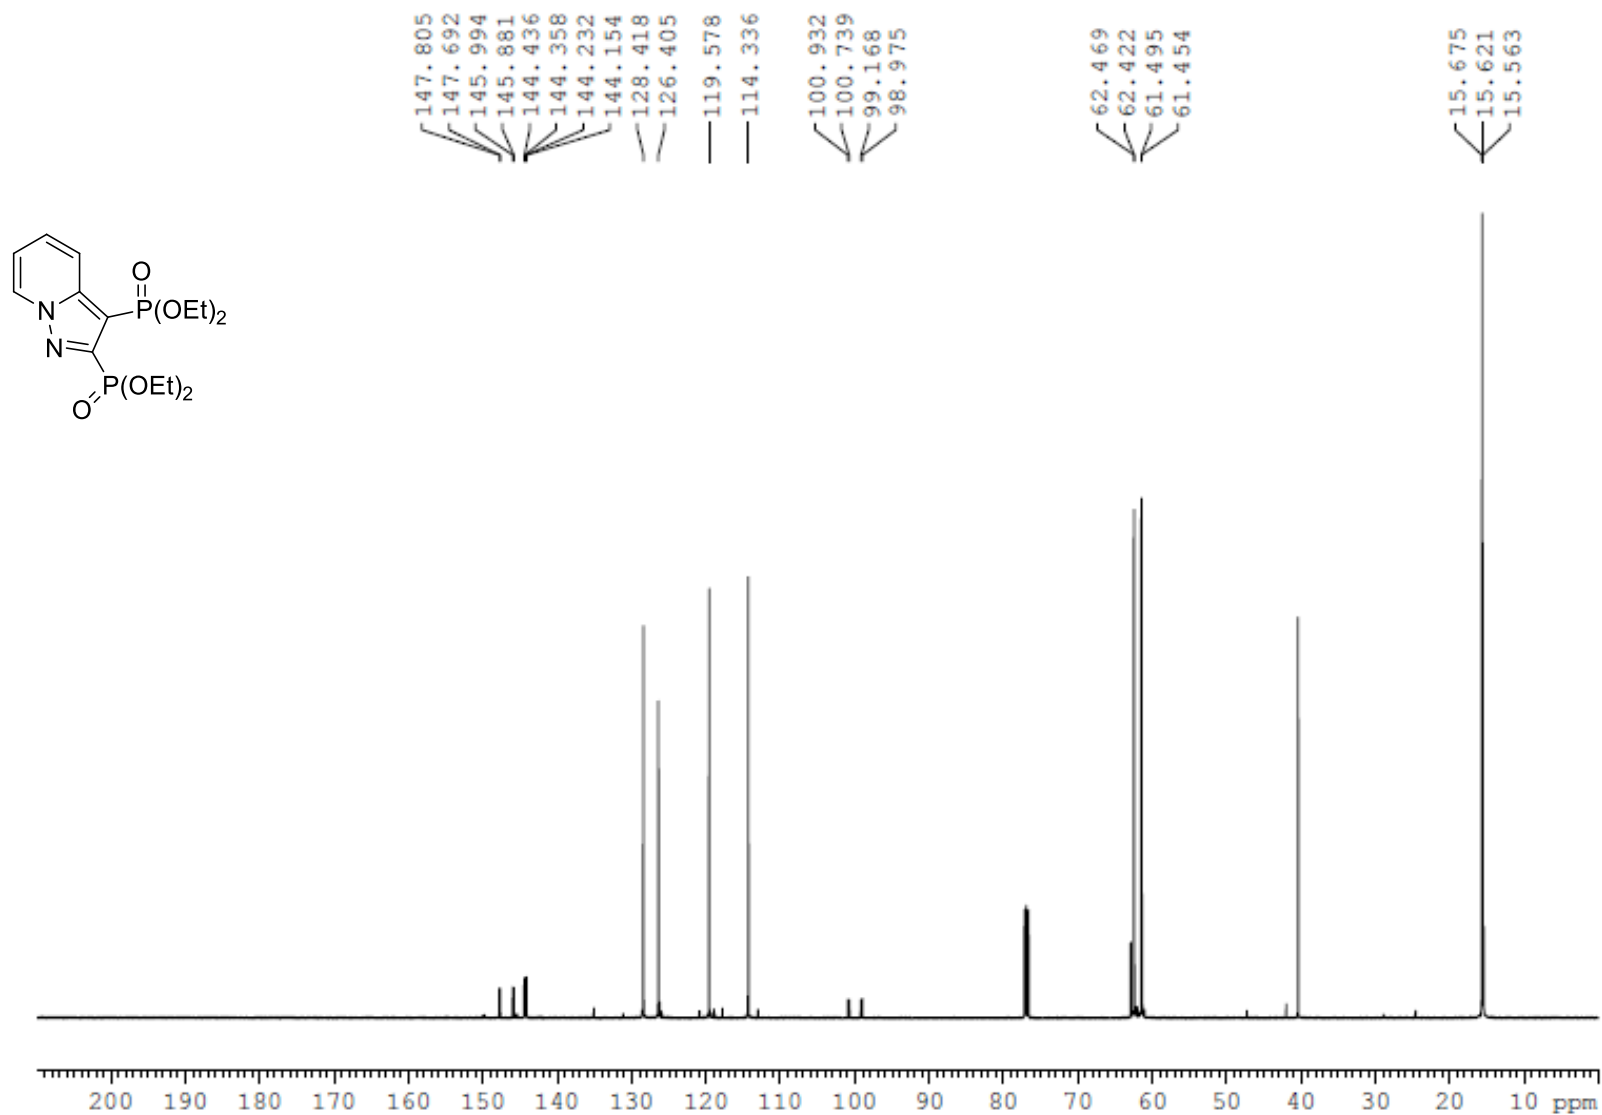



**Tetraethyl pyrazolo[1,5-a]pyridine-2,3-diylbis(phosphonate) (5a)  $^{31}\text{P}$  NMR.**

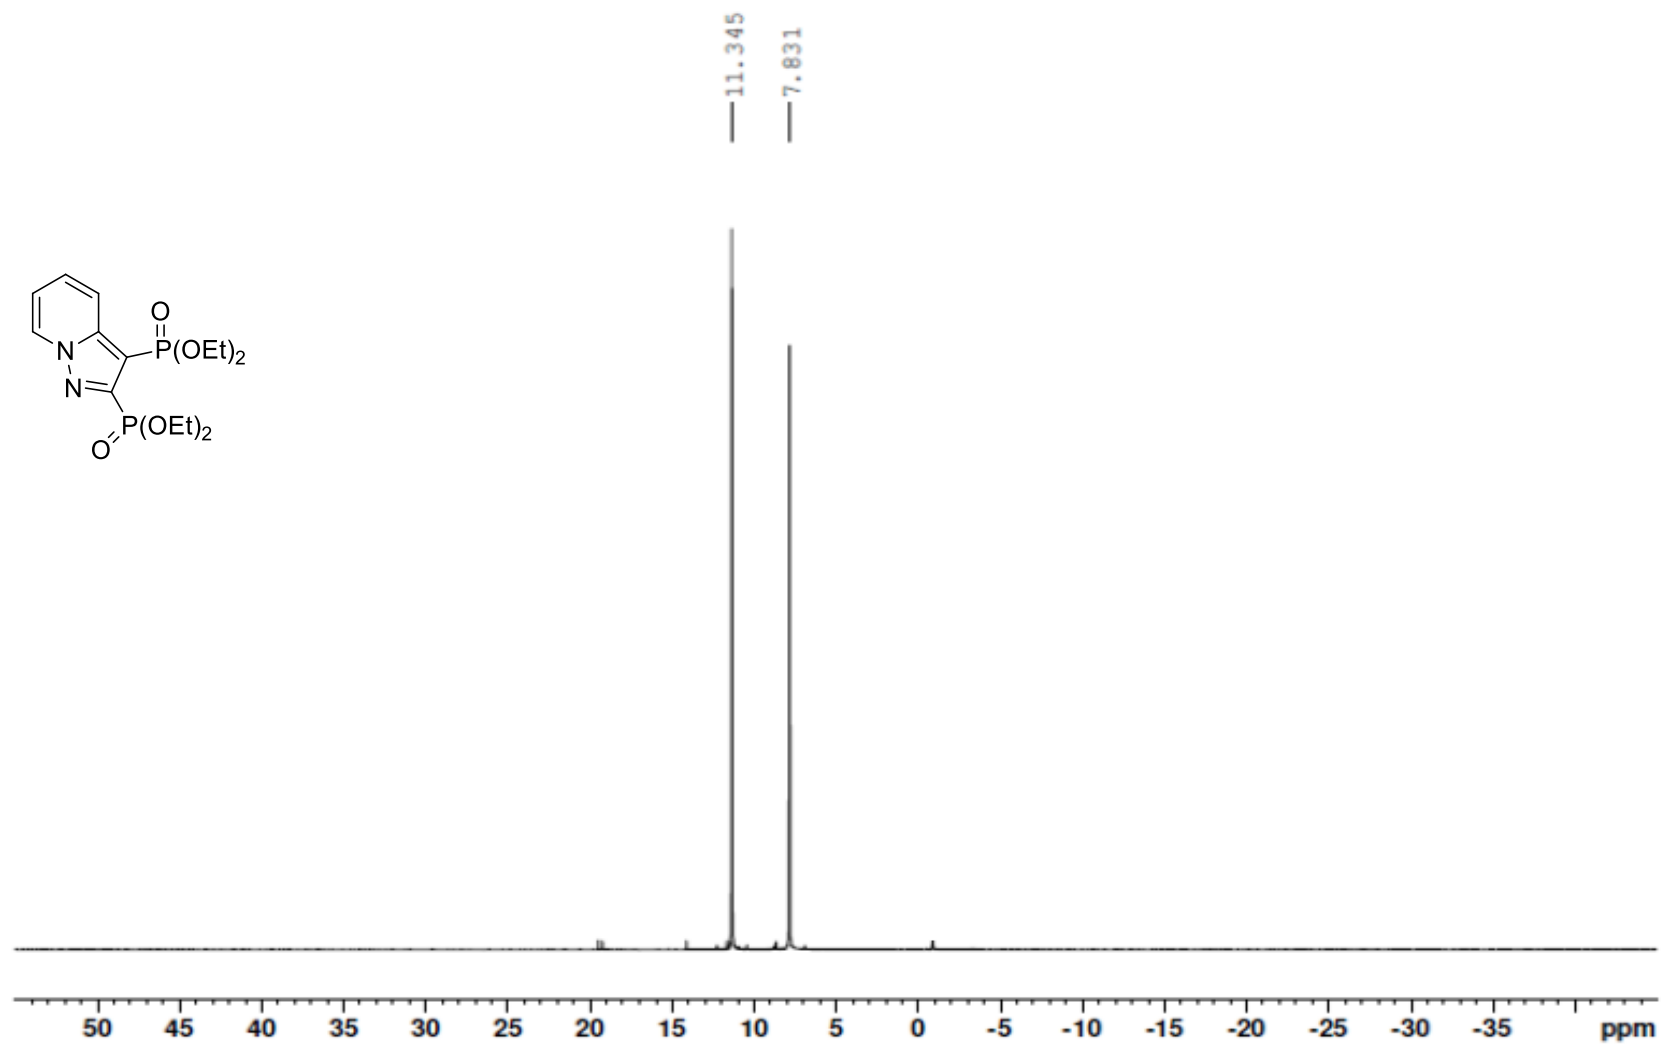

Tetraethyl (5-methylpyrazolo[1,5-a]pyridine-2,3-diyl)bis(phosphonate) (5b)  $^1\text{H}$  NMR

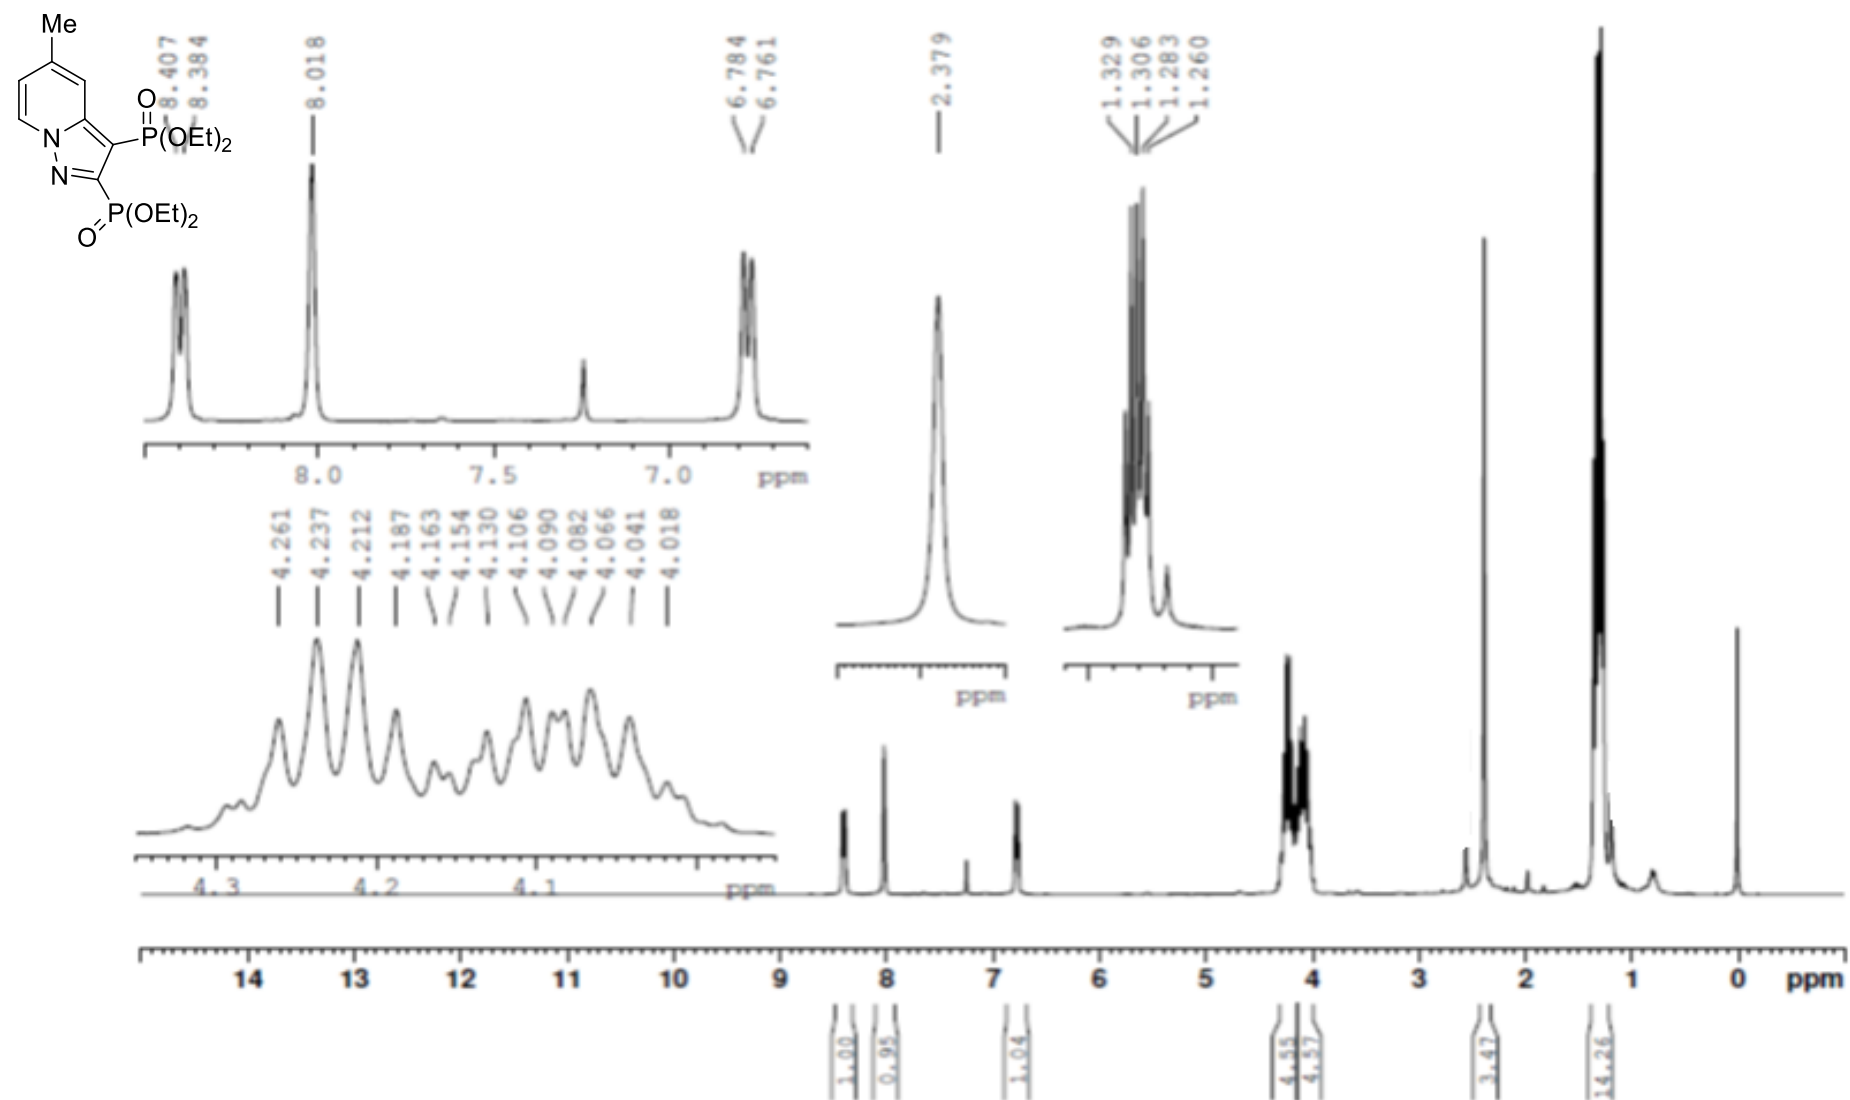

Tetraethyl (5-methylpyrazolo[1,5-a]pyridine-2,3-diyl)bis(phosphonate) (5b)  $^{13}\text{C}$  NMR

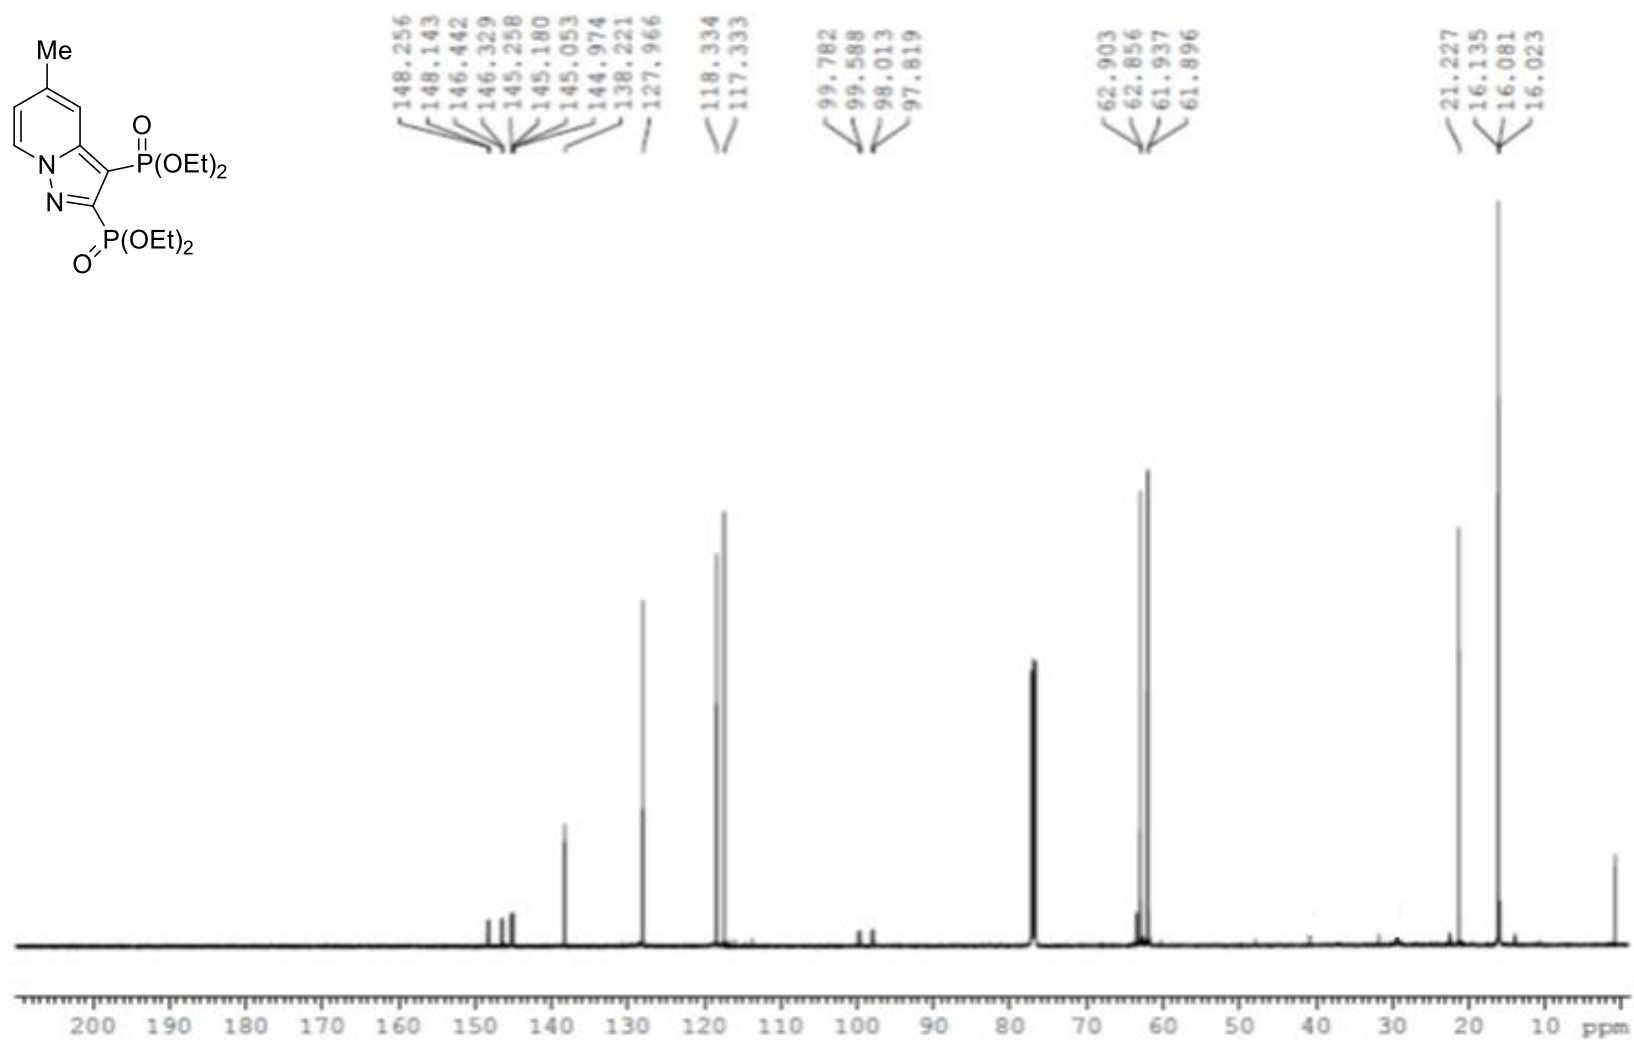

**Tetraethyl (5-methylpyrazolo[1,5-a]pyridine-2,3-diyl)bis(phosphonate) (5b)  $^{31}\text{P}$  NMR**

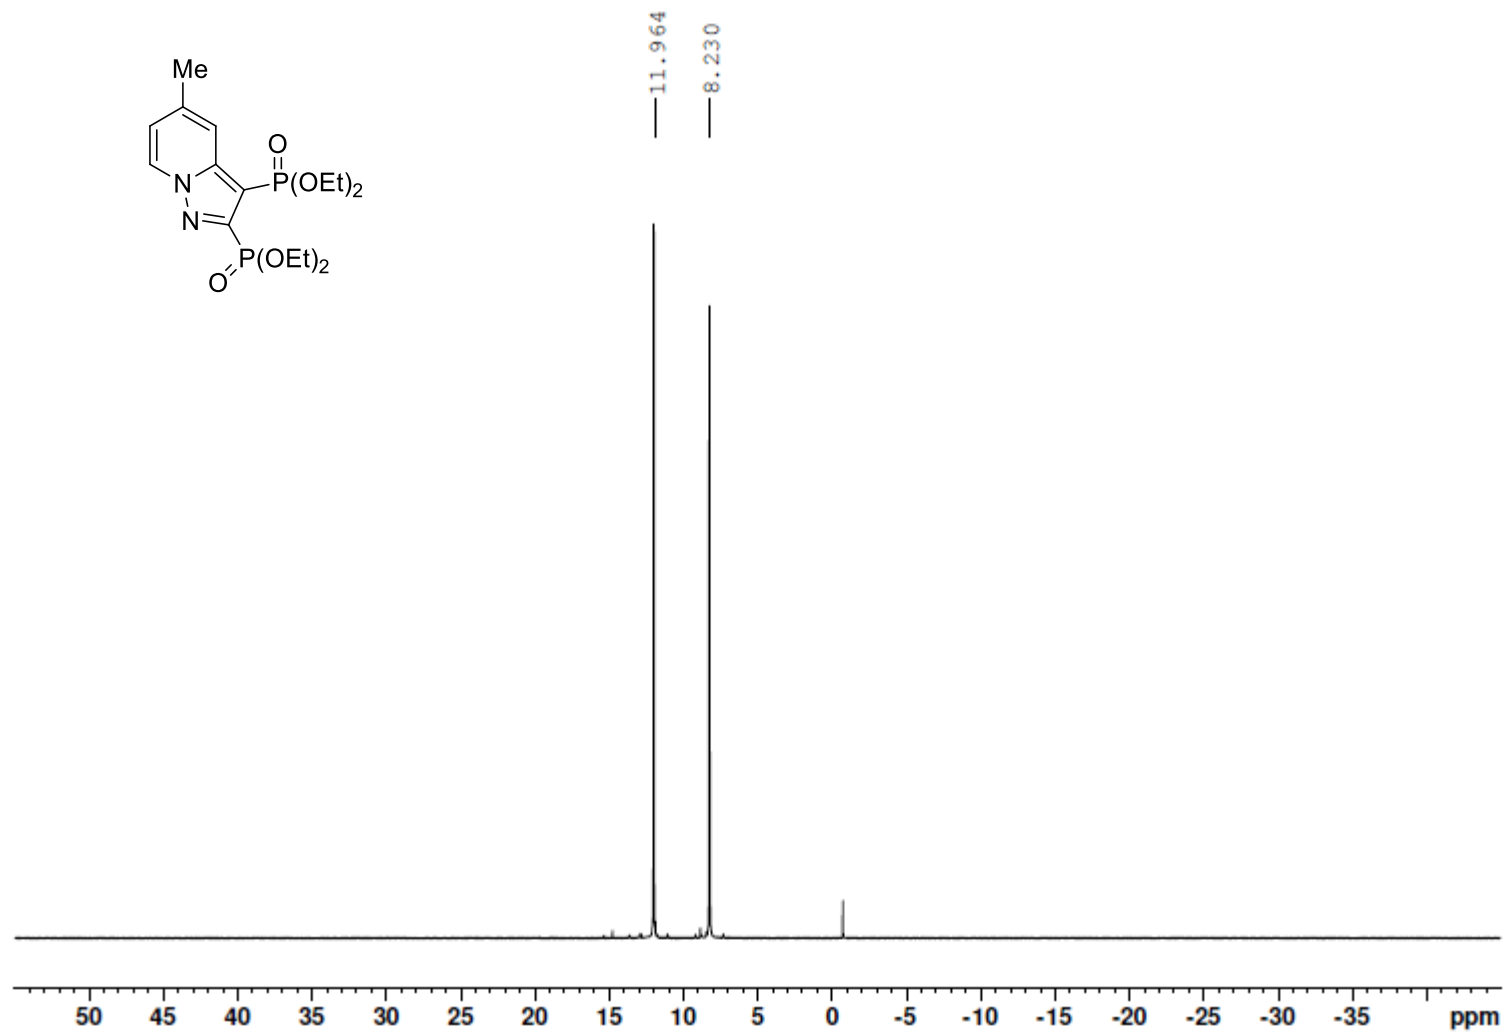

Tetraethyl (6-methylpyrazolo[1,5-*a*]pyridine-2,3-diyl)bis(phosphonate) and tetraethyl (4-methylpyrazolo[1,5-*a*]pyridine-2,3-diyl)bis(phosphonate) mixture (5c)  $^1\text{H}$  NMR.

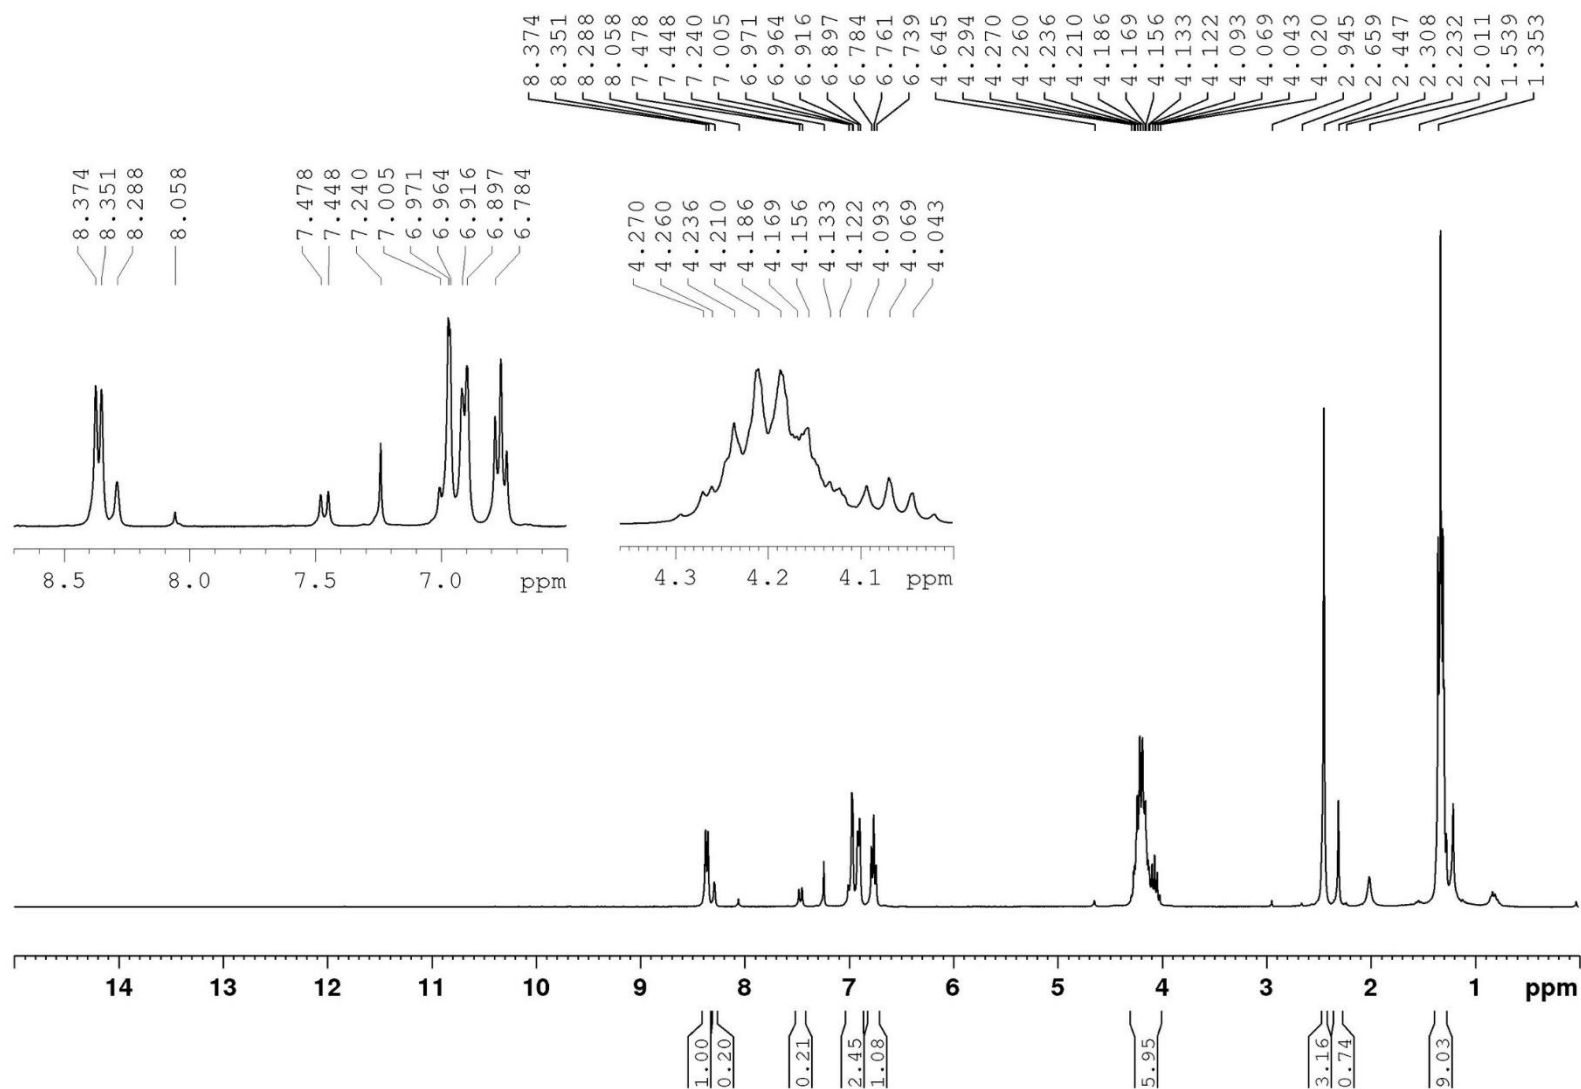

Tetraethyl (6-methylpyrazolo[1,5-*a*]pyridine-2,3-diyl)bis(phosphonate) and tetraethyl (4-methylpyrazolo[1,5-*a*]pyridine-2,3-diyl)bis(phosphonate) mixture (5c)  $^{31}\text{P}$  NMR.

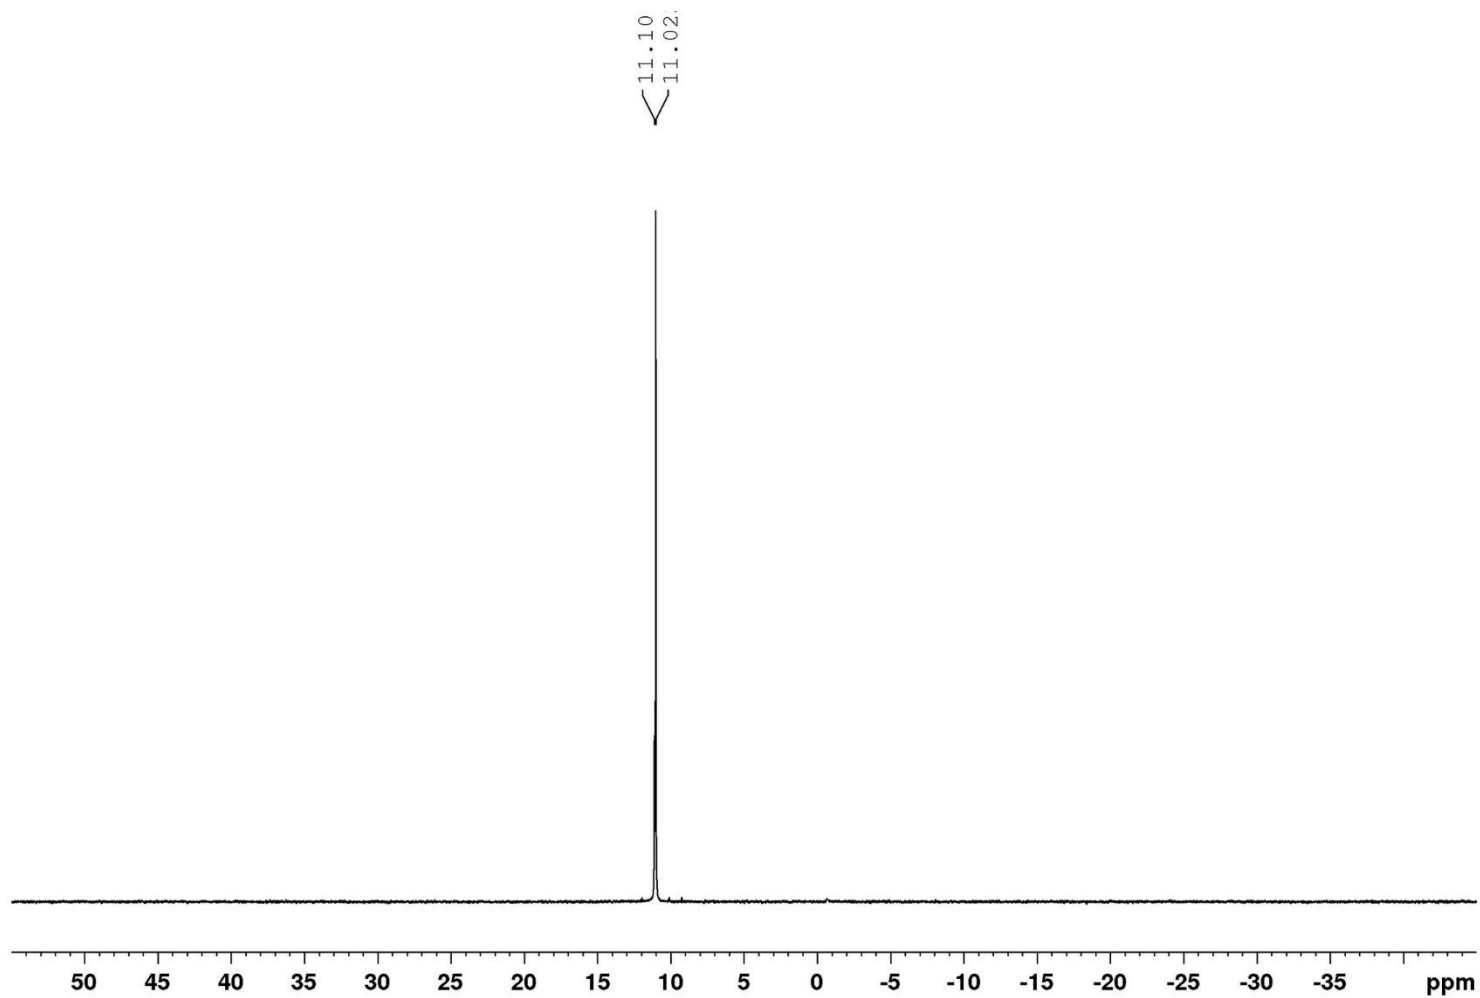

Ethyl 2,3-bis(diethoxyphosphoryl)pyrazolo[1,5-a]pyridine-5-carboxylate (5d)  $^1\text{H}$  NMR

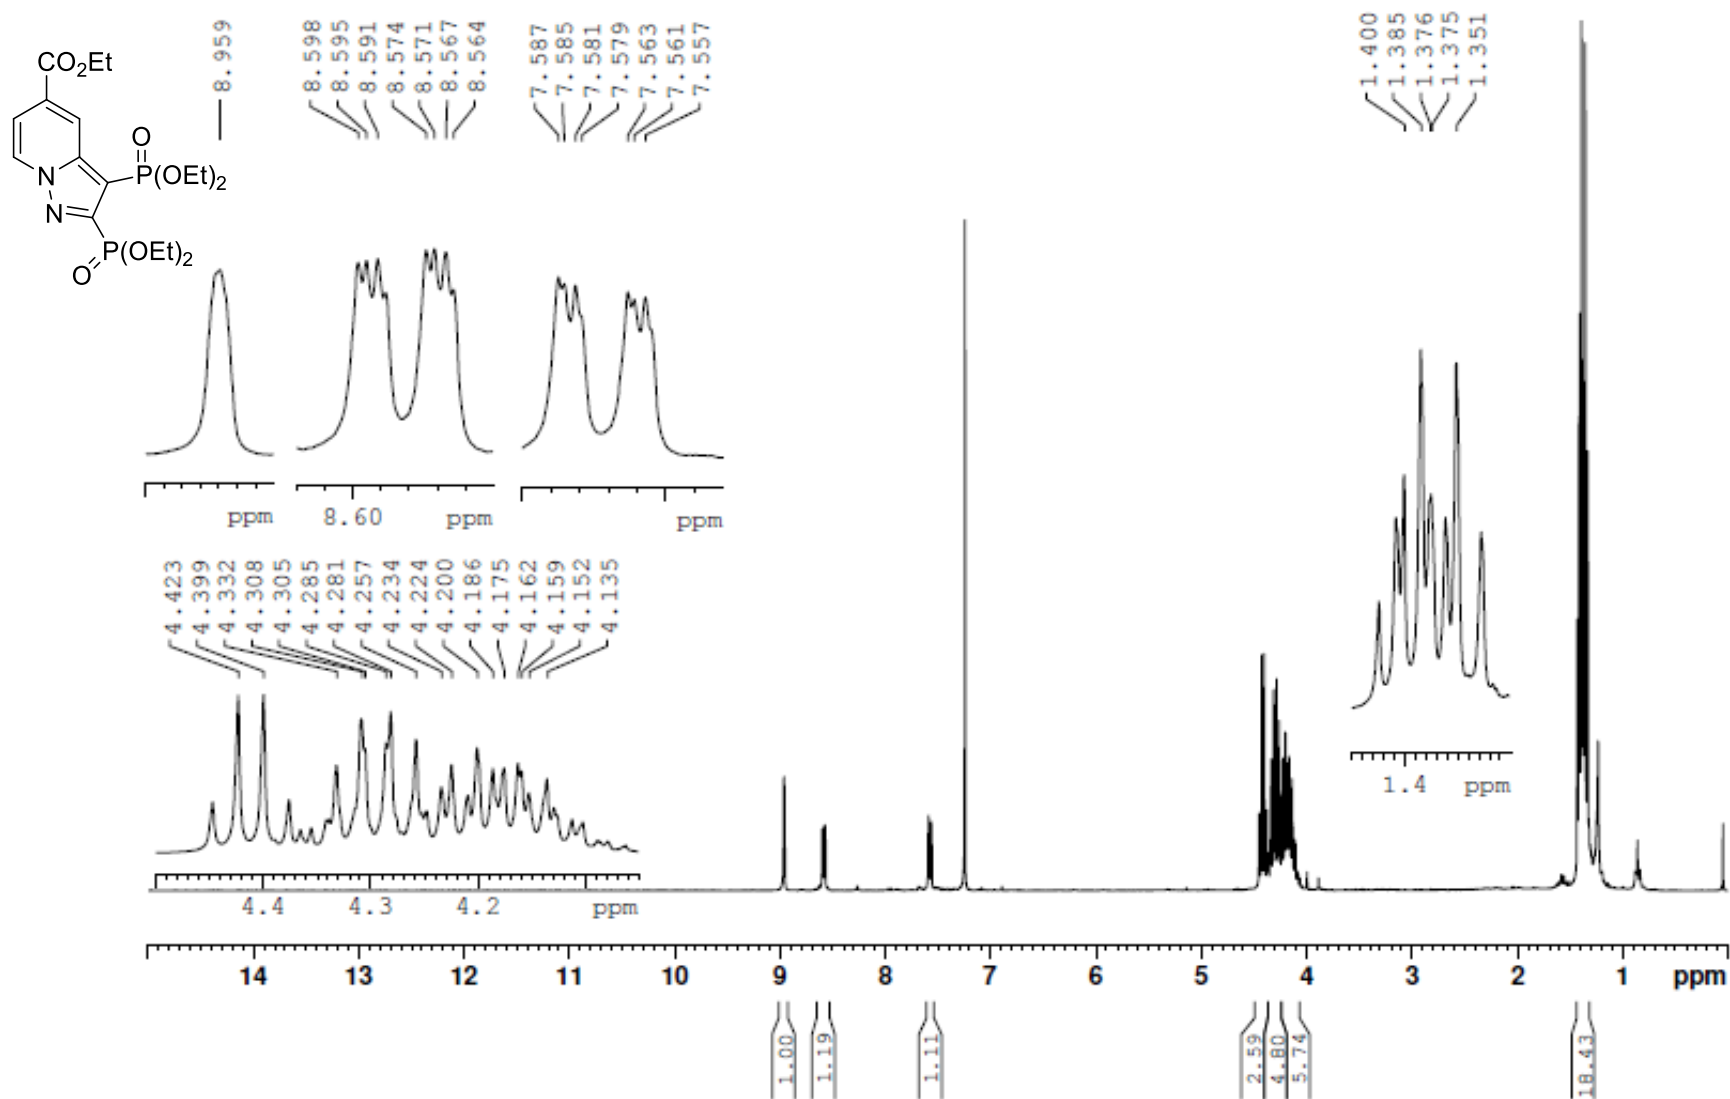

Ethyl 2,3-bis(diethoxyphosphoryl)pyrazolo[1,5-a]pyridine-5-carboxylate (5d)  $^{13}\text{C}$  NMR

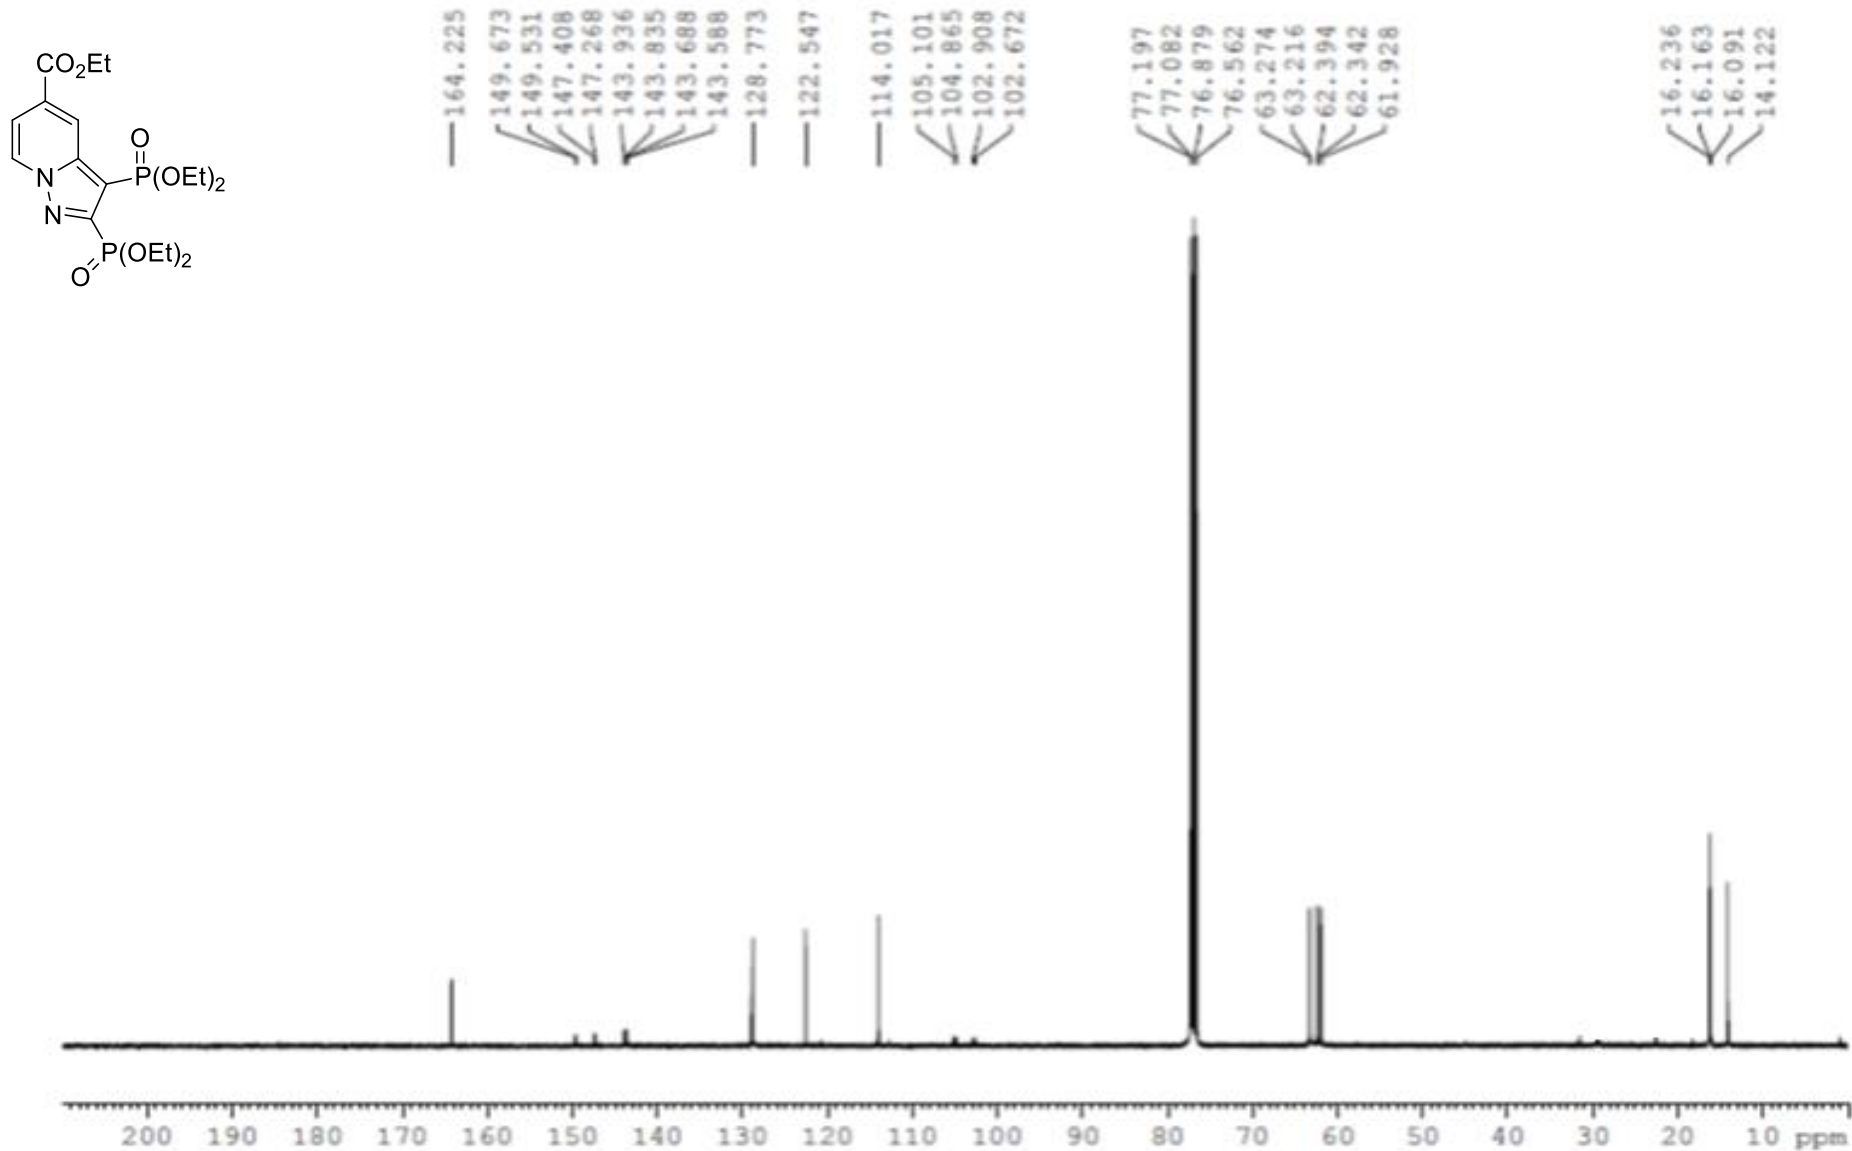



Ethyl 2,3-bis(diethoxyphosphoryl)pyrazolo[1,5-a]pyridine-5-carboxylate (5d)  $^{31}\text{P}$  NMR

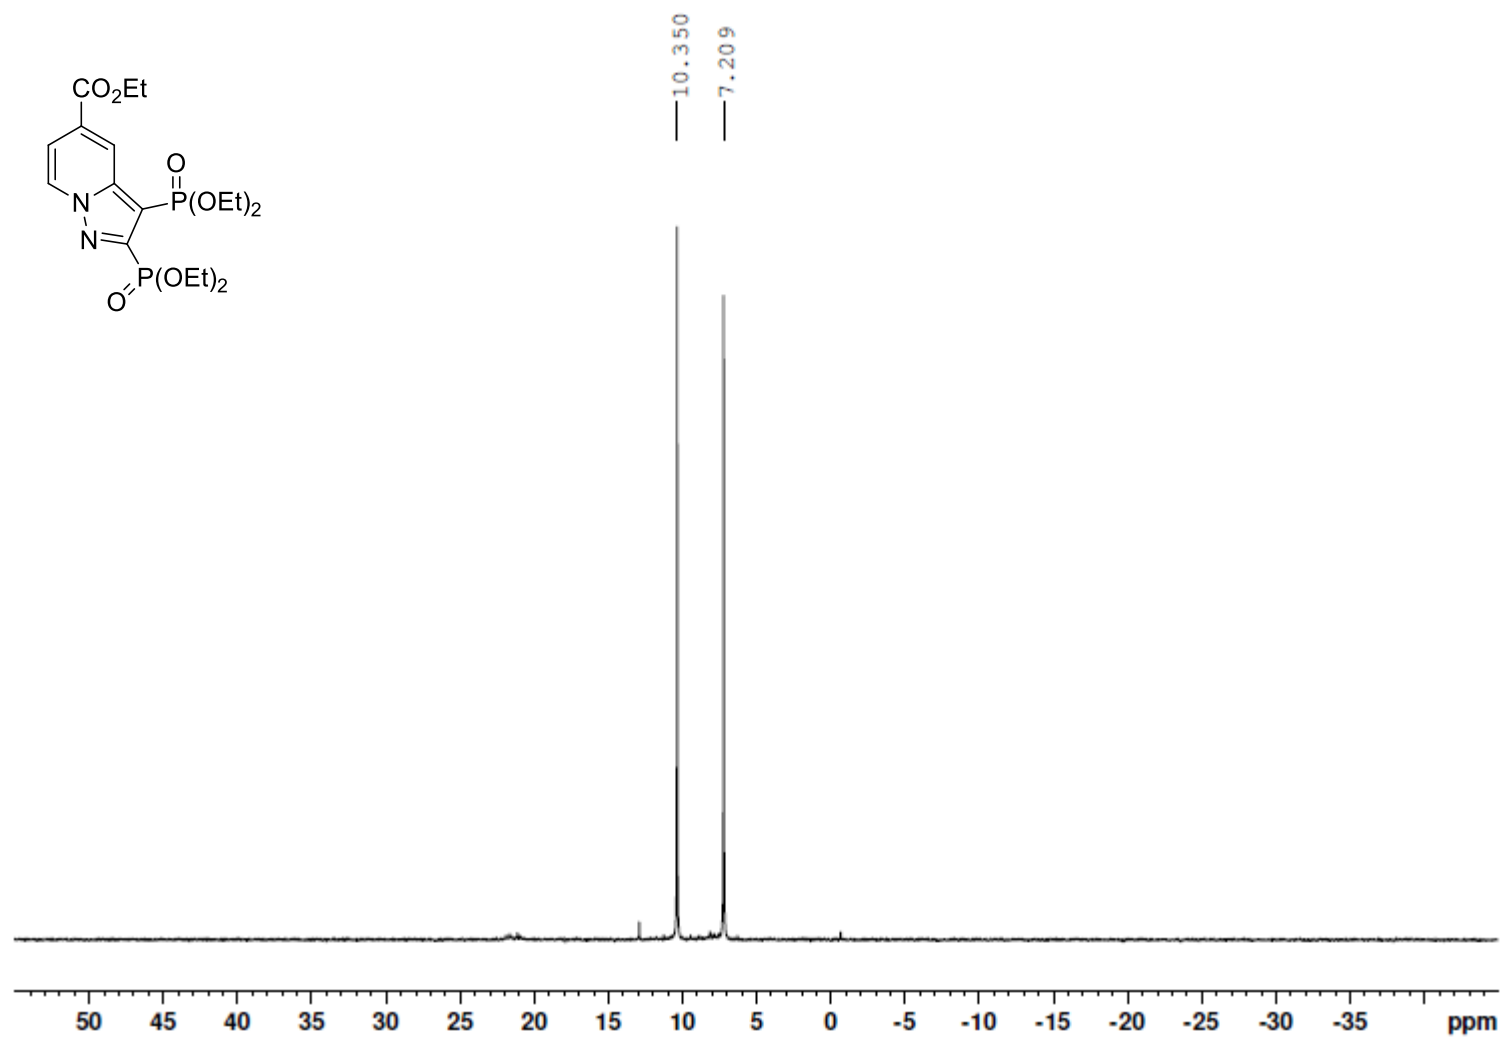

**Tetraethyl (5-methoxypyrazolo[1,5-a]pyridine-2,3-diyl)bis(phosphonate) (5e)  $^1\text{H}$  NMR.**

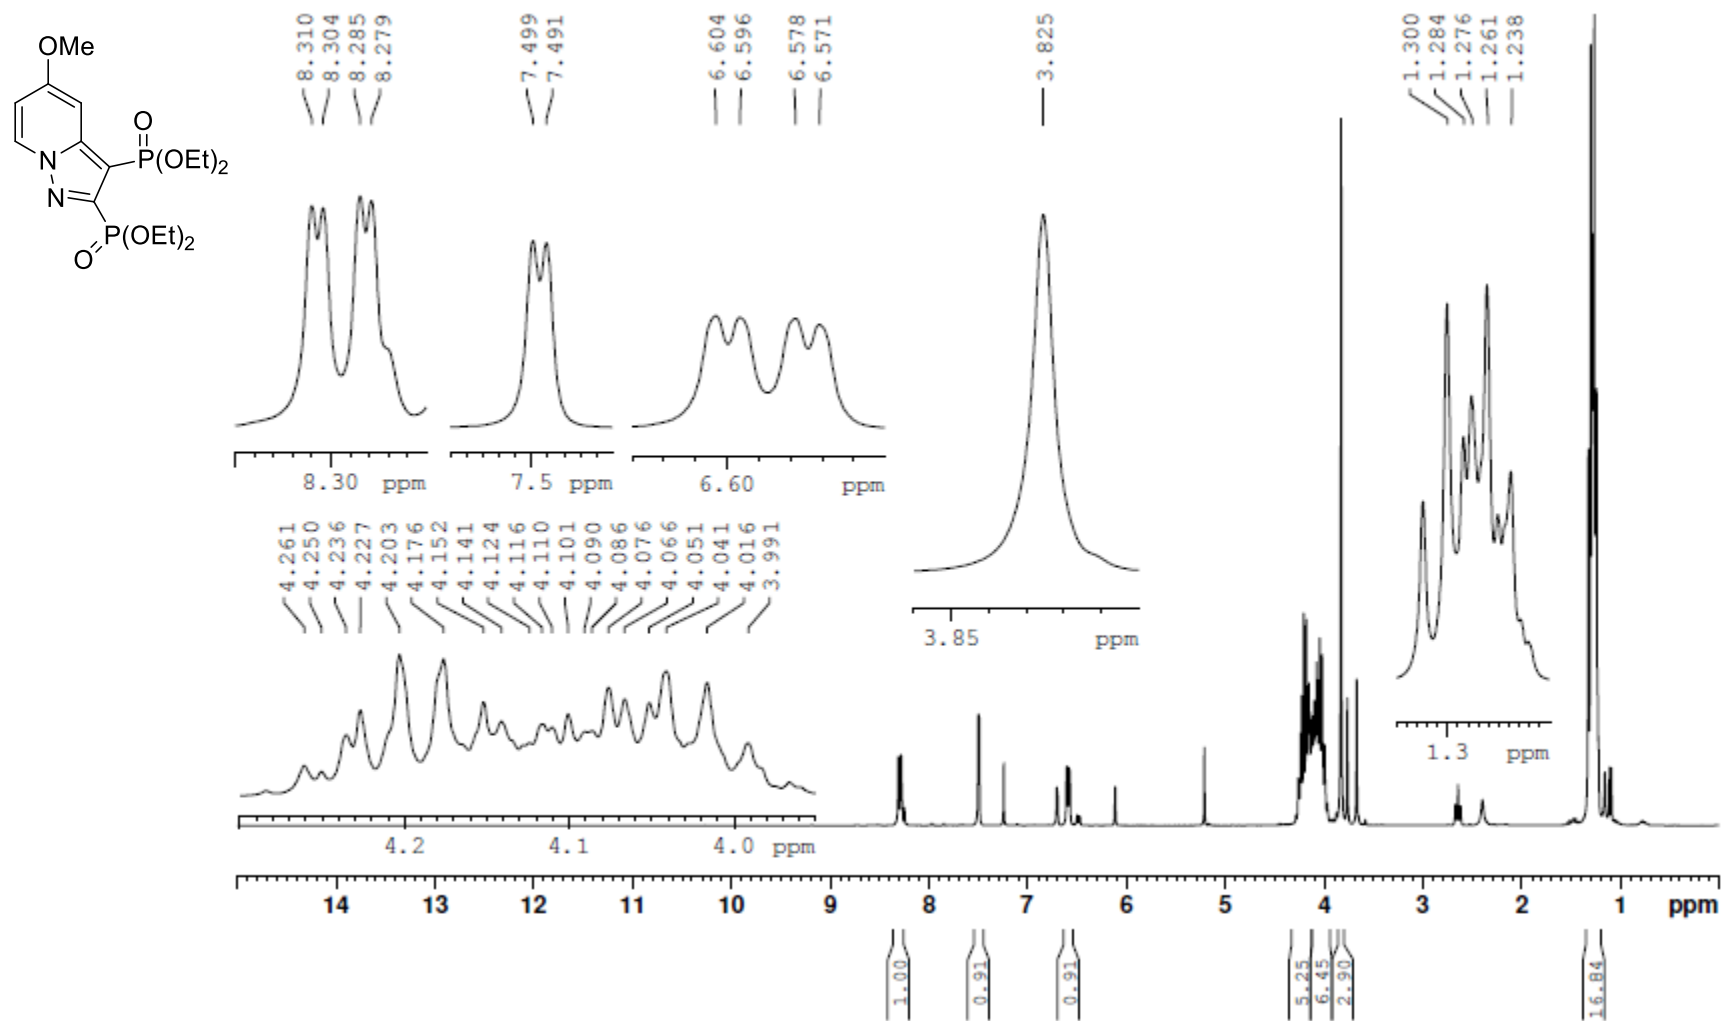

**Tetraethyl (5-methoxypyrazolo[1,5-a]pyridine-2,3-diyl)bis(phosphonate)  $^{31}\text{P}$  NMR**

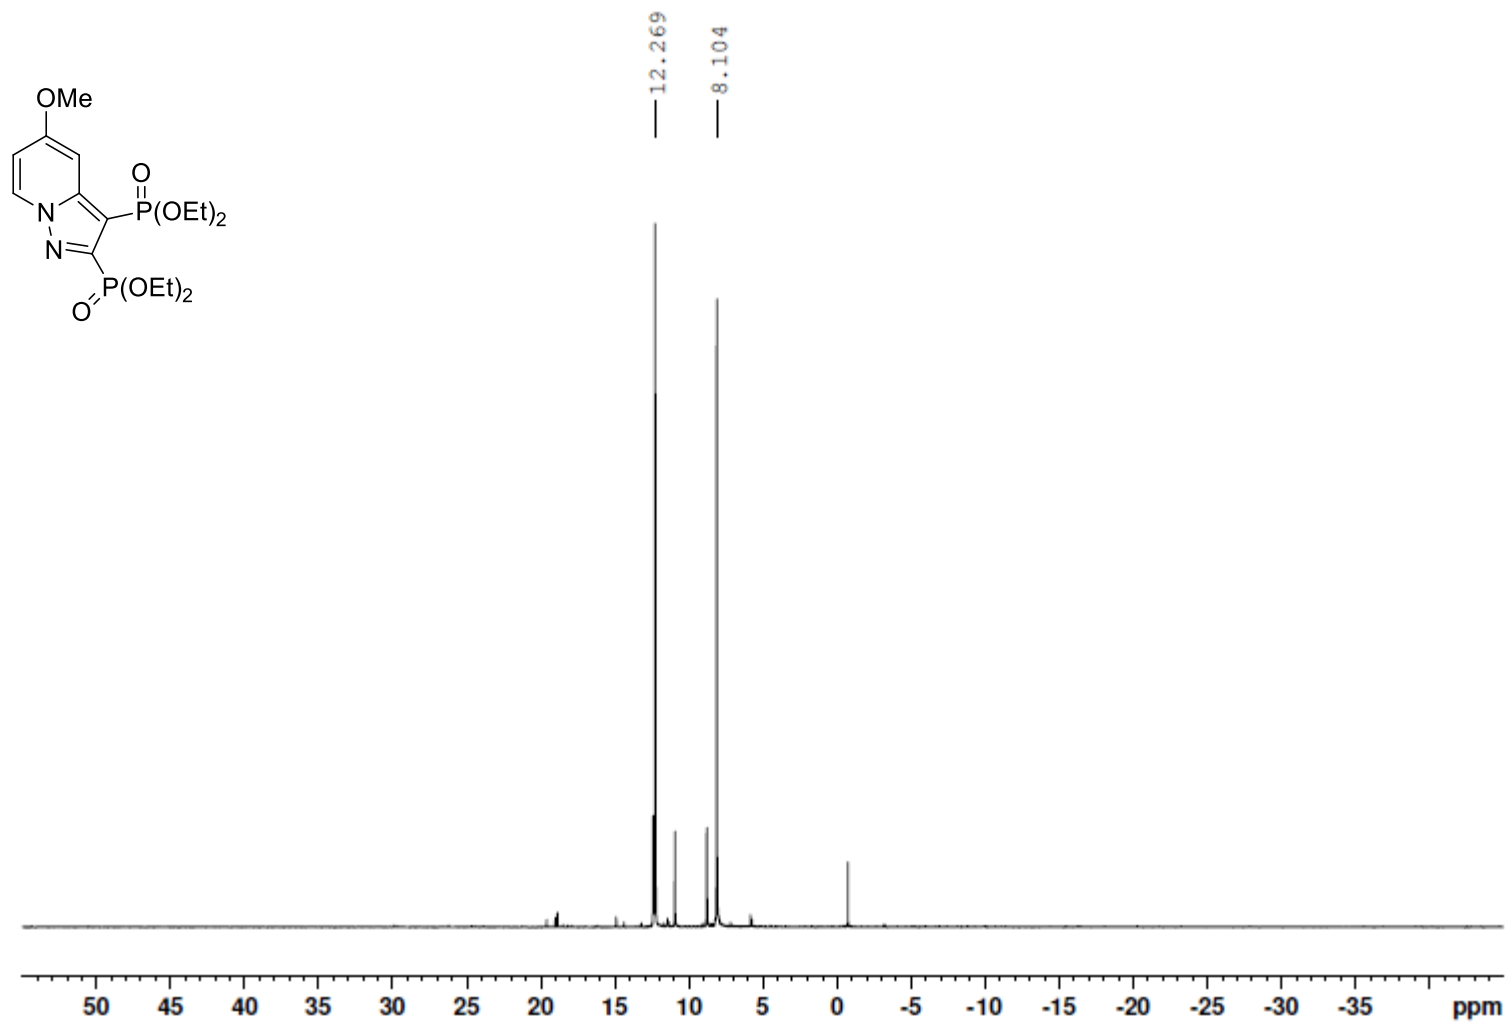

**Tetraethyl 5-(pyridin-4-yl)pyrazolo[1,5-a]pyridine-2,3-diylldiphosphonate (5f) <sup>1</sup>H NMR.**

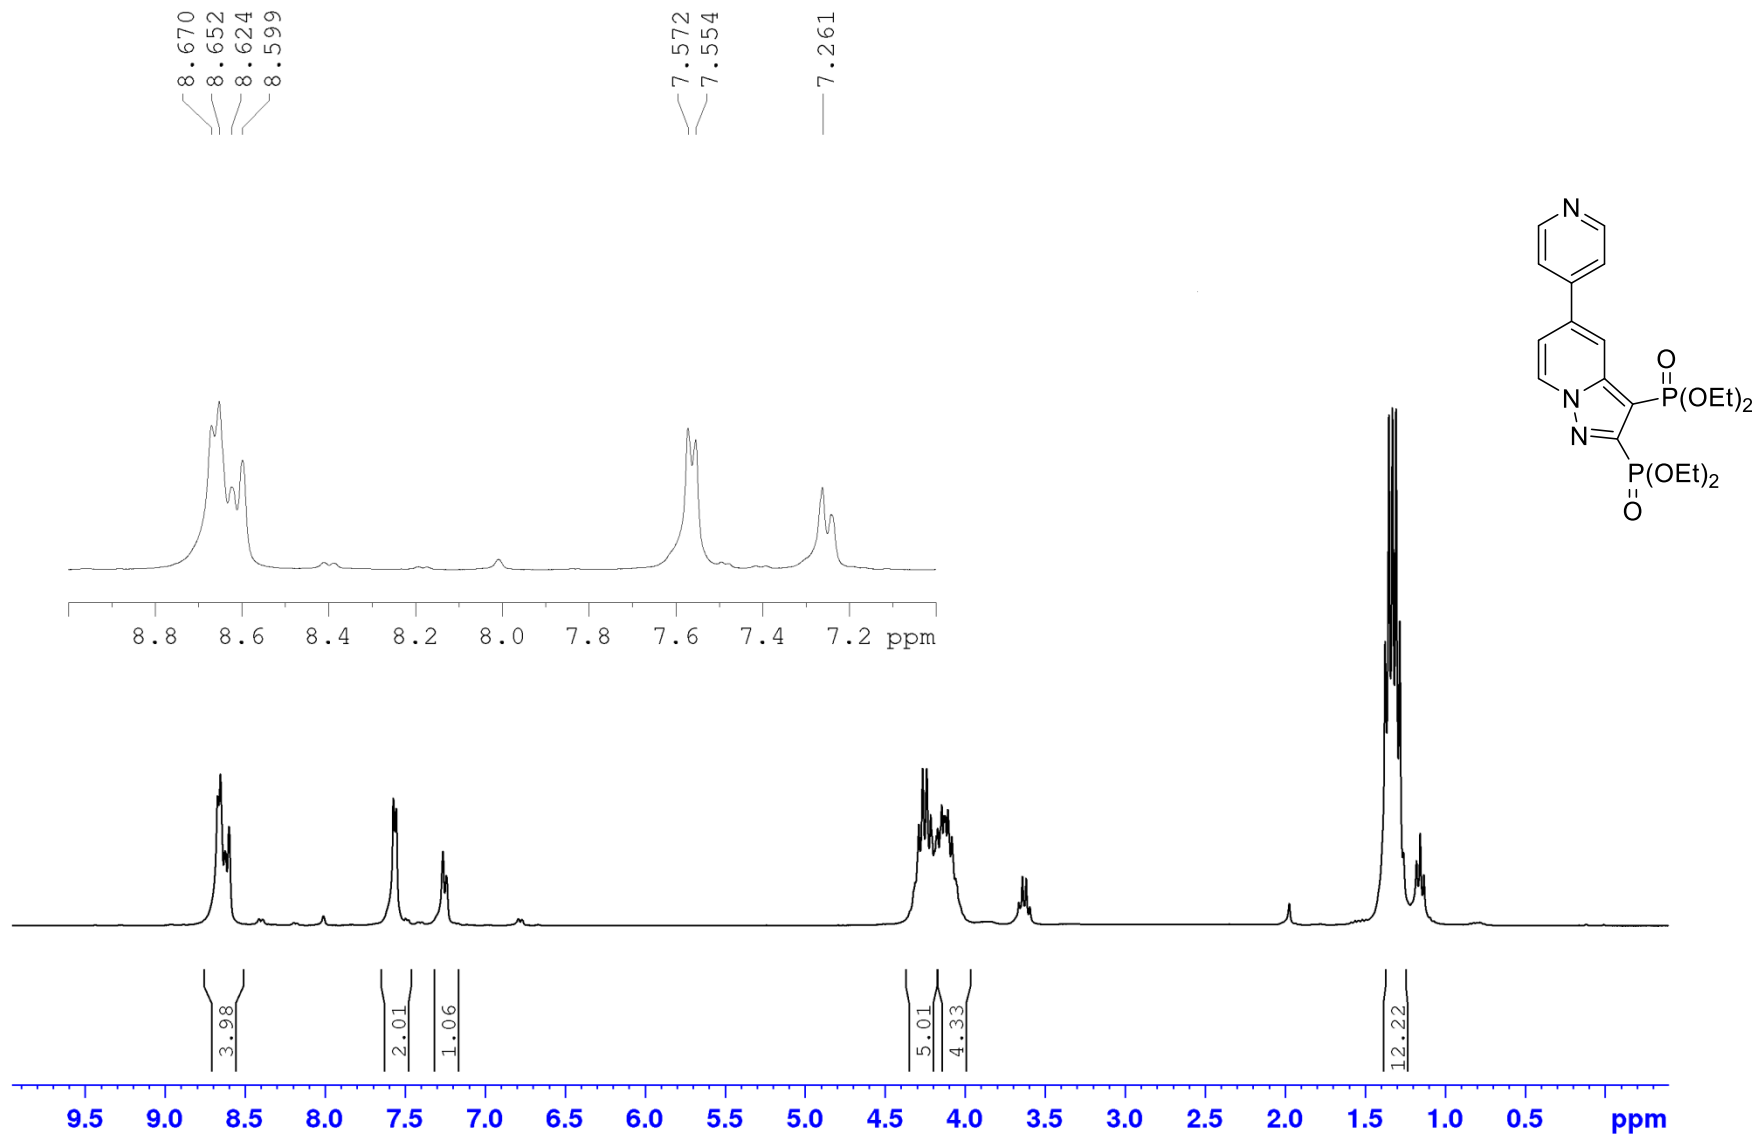

**Tetraethyl 5-(pyridin-4-yl)pyrazolo[1,5-a]pyridine-2,3-diylidiphosphonate (5f)  $^{13}\text{C}$  NMR.**

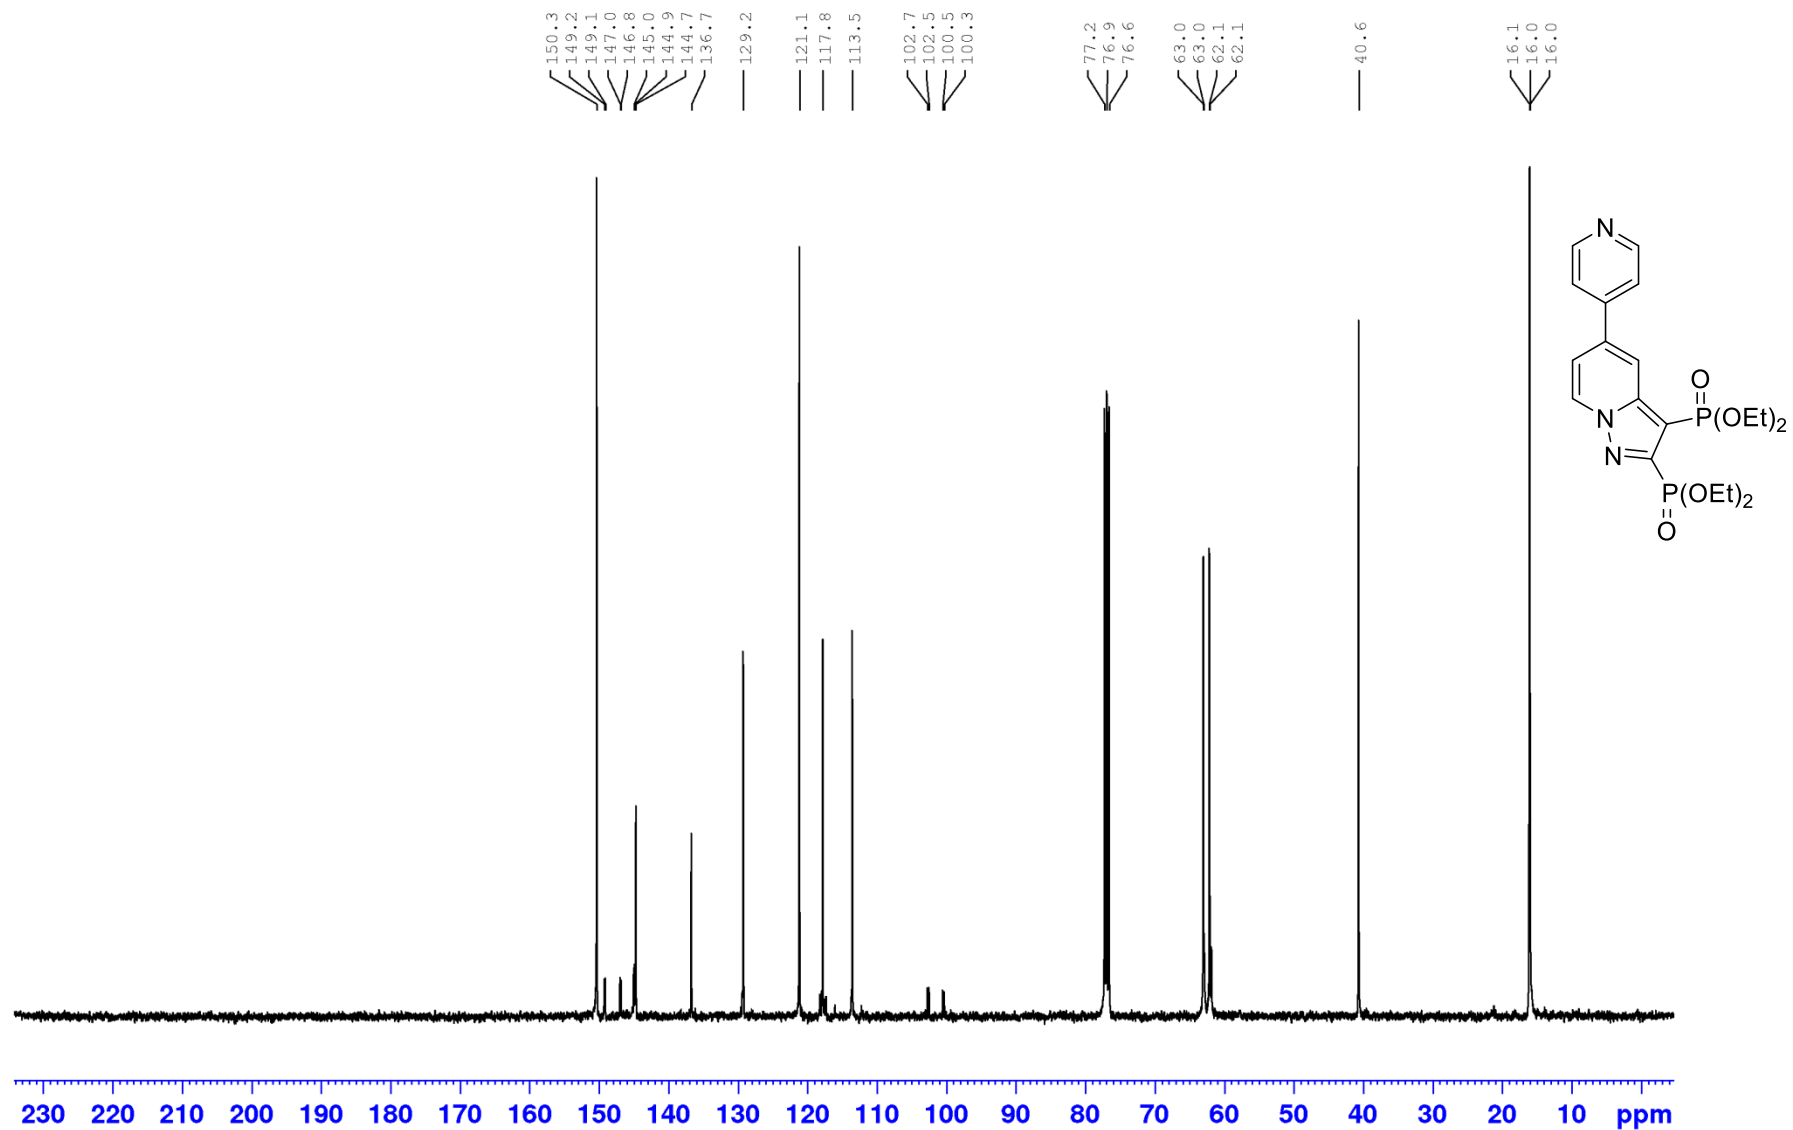

**Tetraethyl 5-(pyridin-4-yl)pyrazolo[1,5-a]pyridine-2,3-diylidiphosphonate (5f)  $^{31}\text{P}$  NMR.**

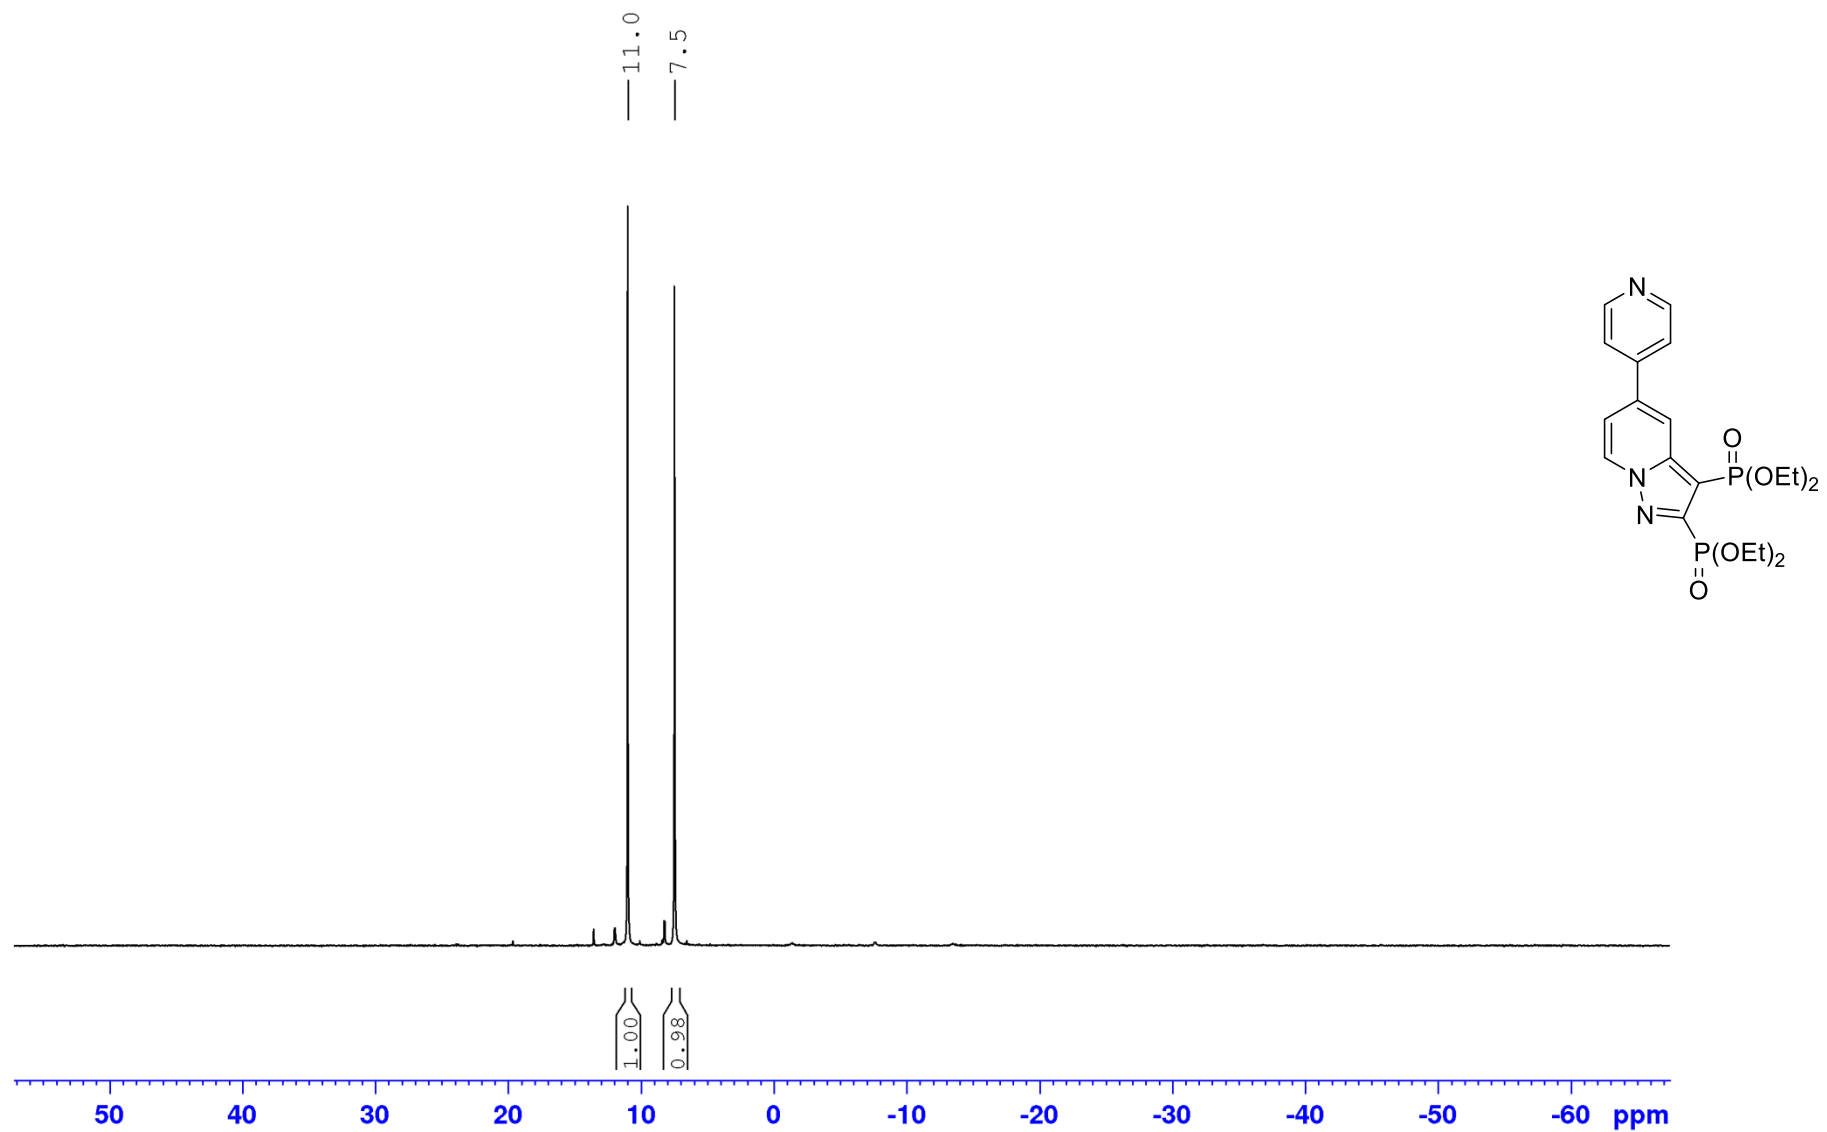

Tetraethyl pyrazolo[1,5-a]quinoline-2,3-diylldiphosphonate (5g)  $^1\text{H}$  NMR

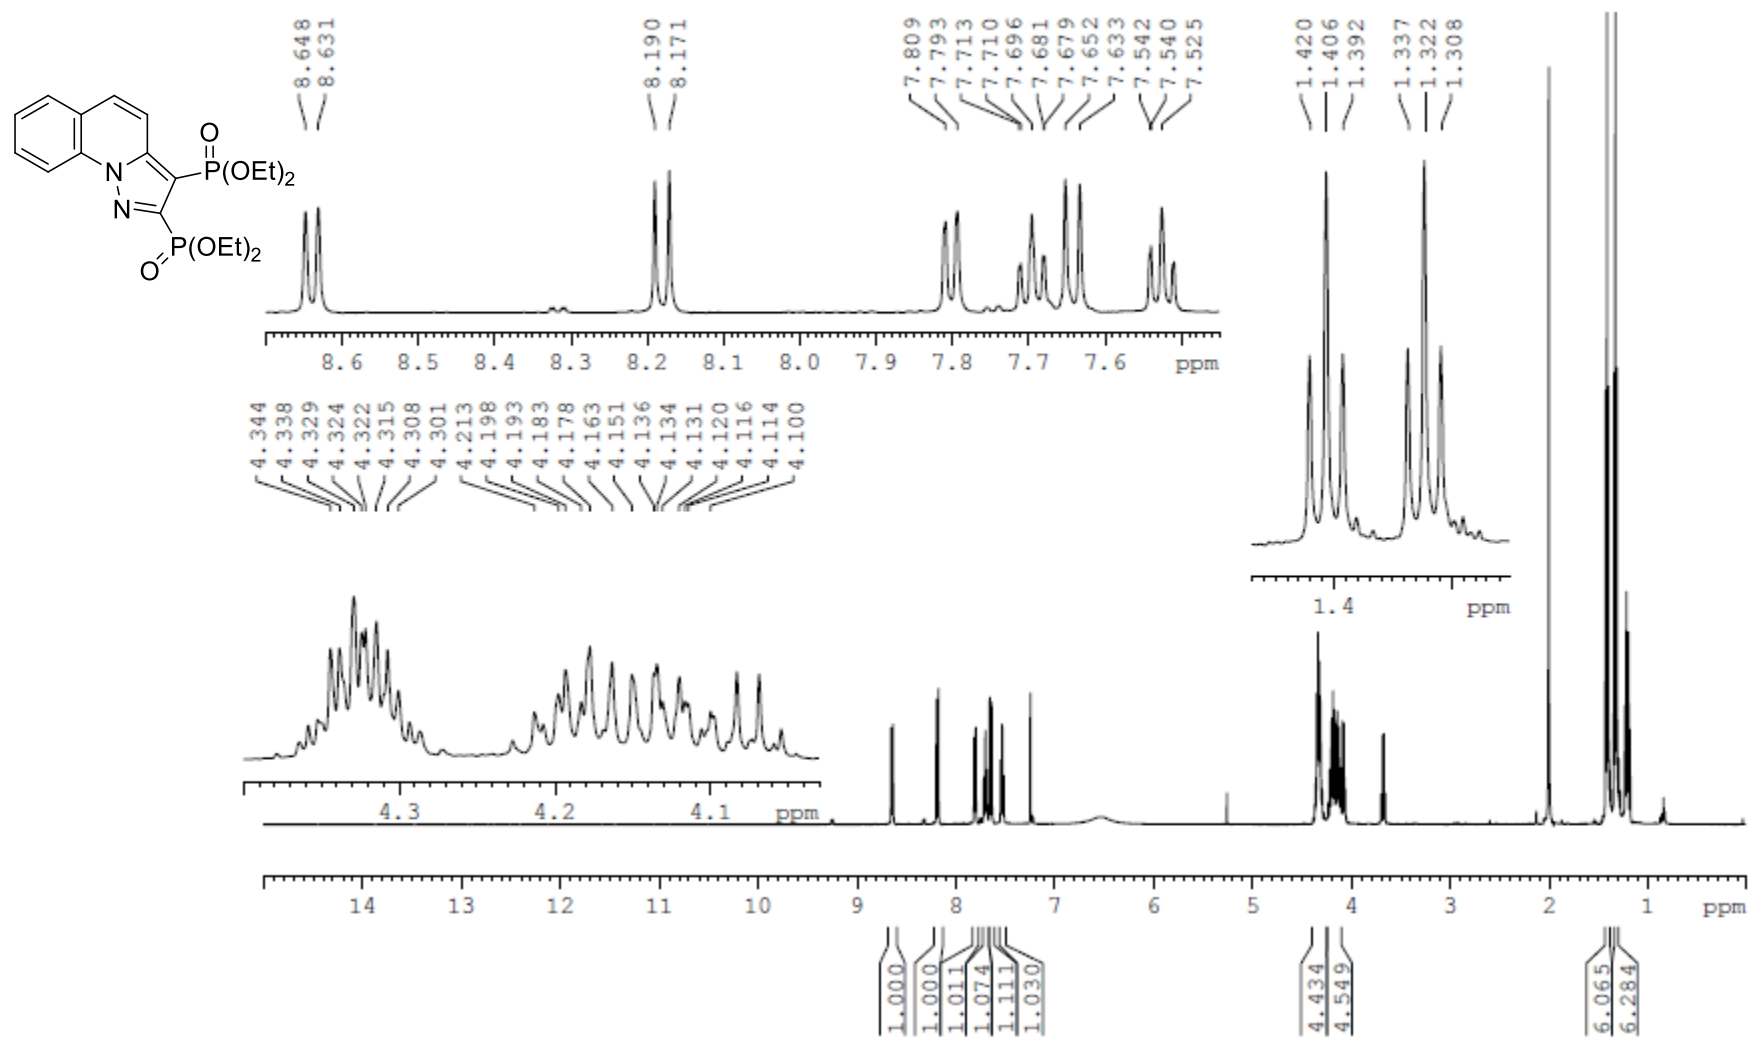

Tetraethyl pyrazolo[1,5-a]quinoline-2,3-diylldiphosphonate (5g)  $^{13}\text{C}$  NMR

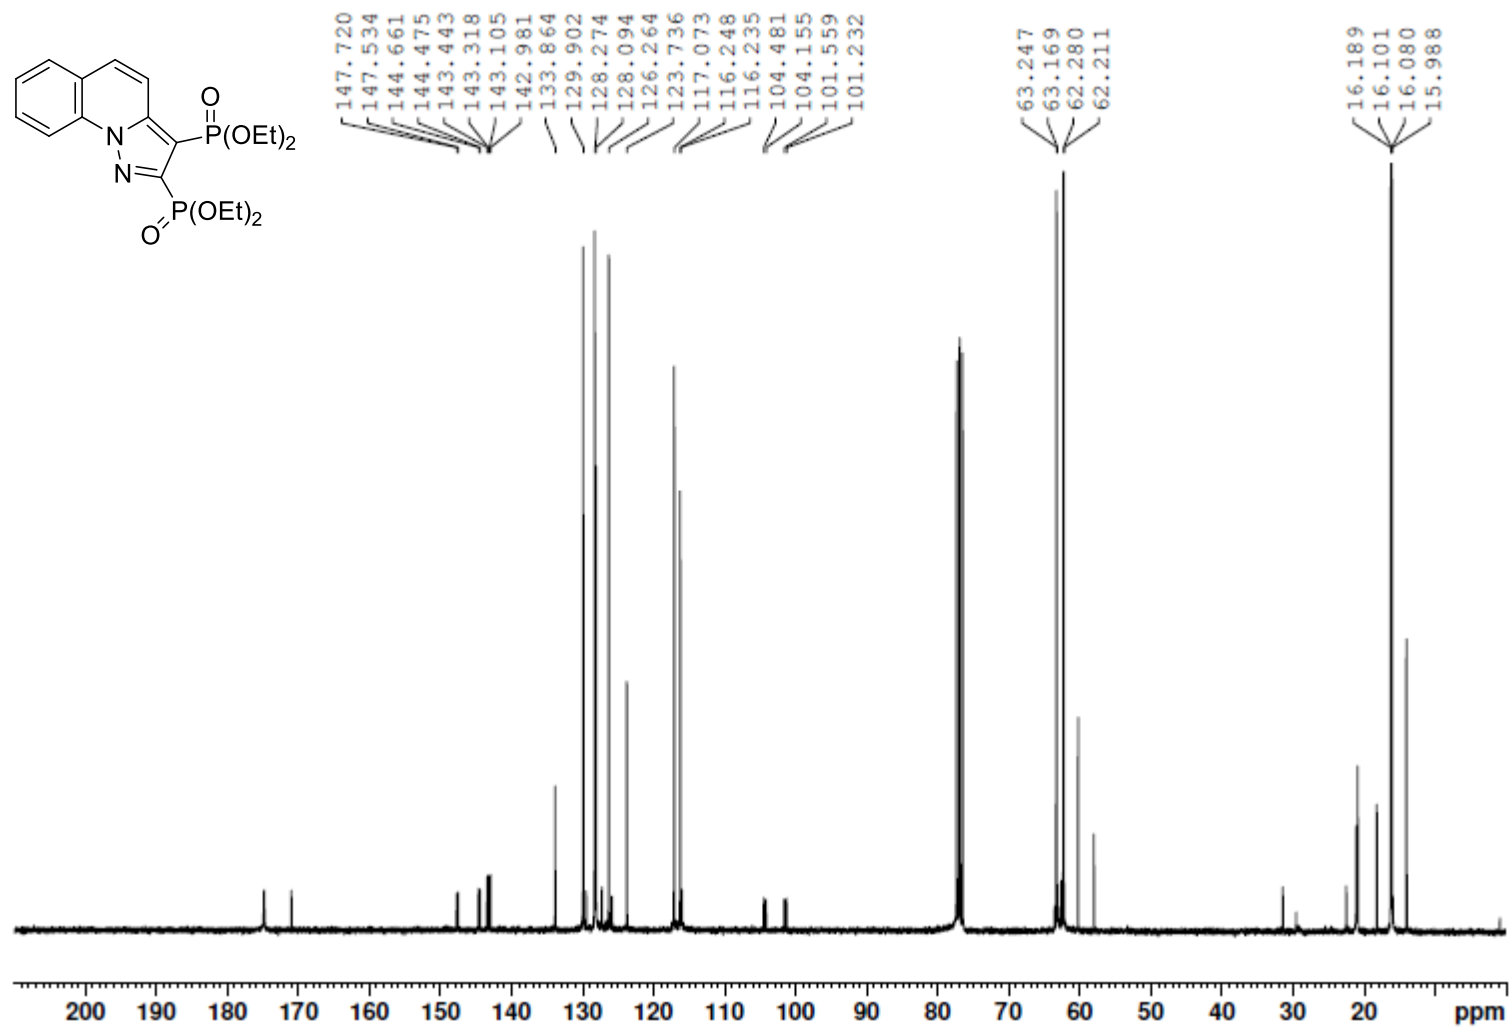



**Tetraethyl pyrazolo[1,5-a]quinoline-2,3-diylldiphosphonate (5g)  $^{31}\text{P}$  NMR**

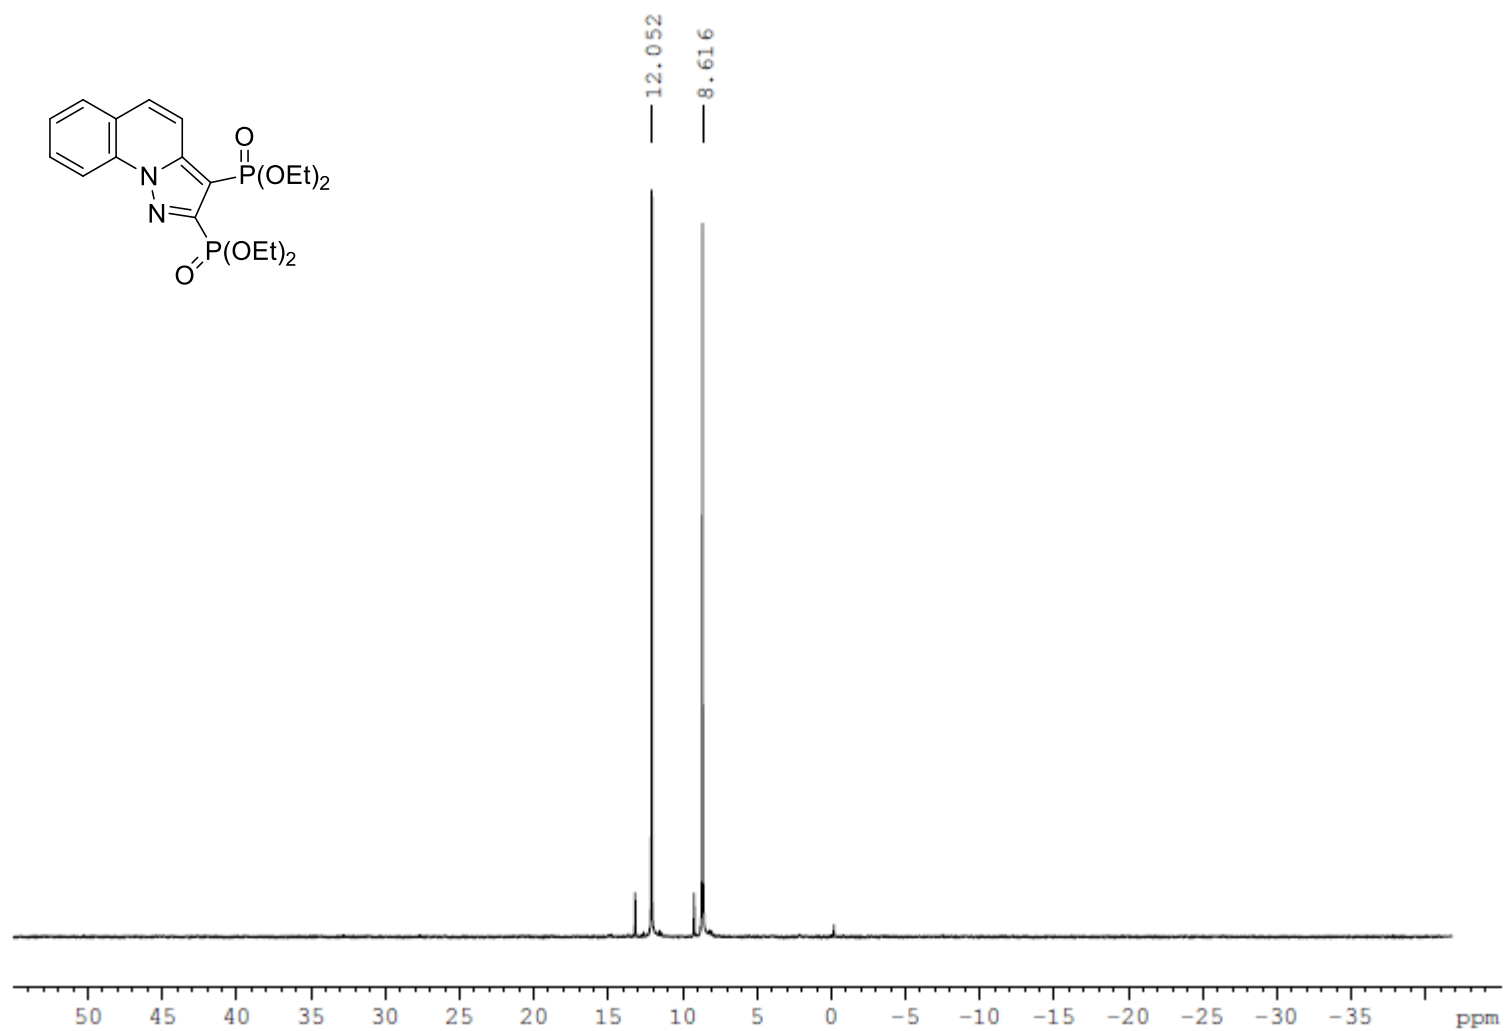

**Tetraethyl (9-hydroxypyrazolo[1,5-a]quinoline-2,3-diyl)bis(phosphonate) (5h)  $^1\text{H}$  NMR**

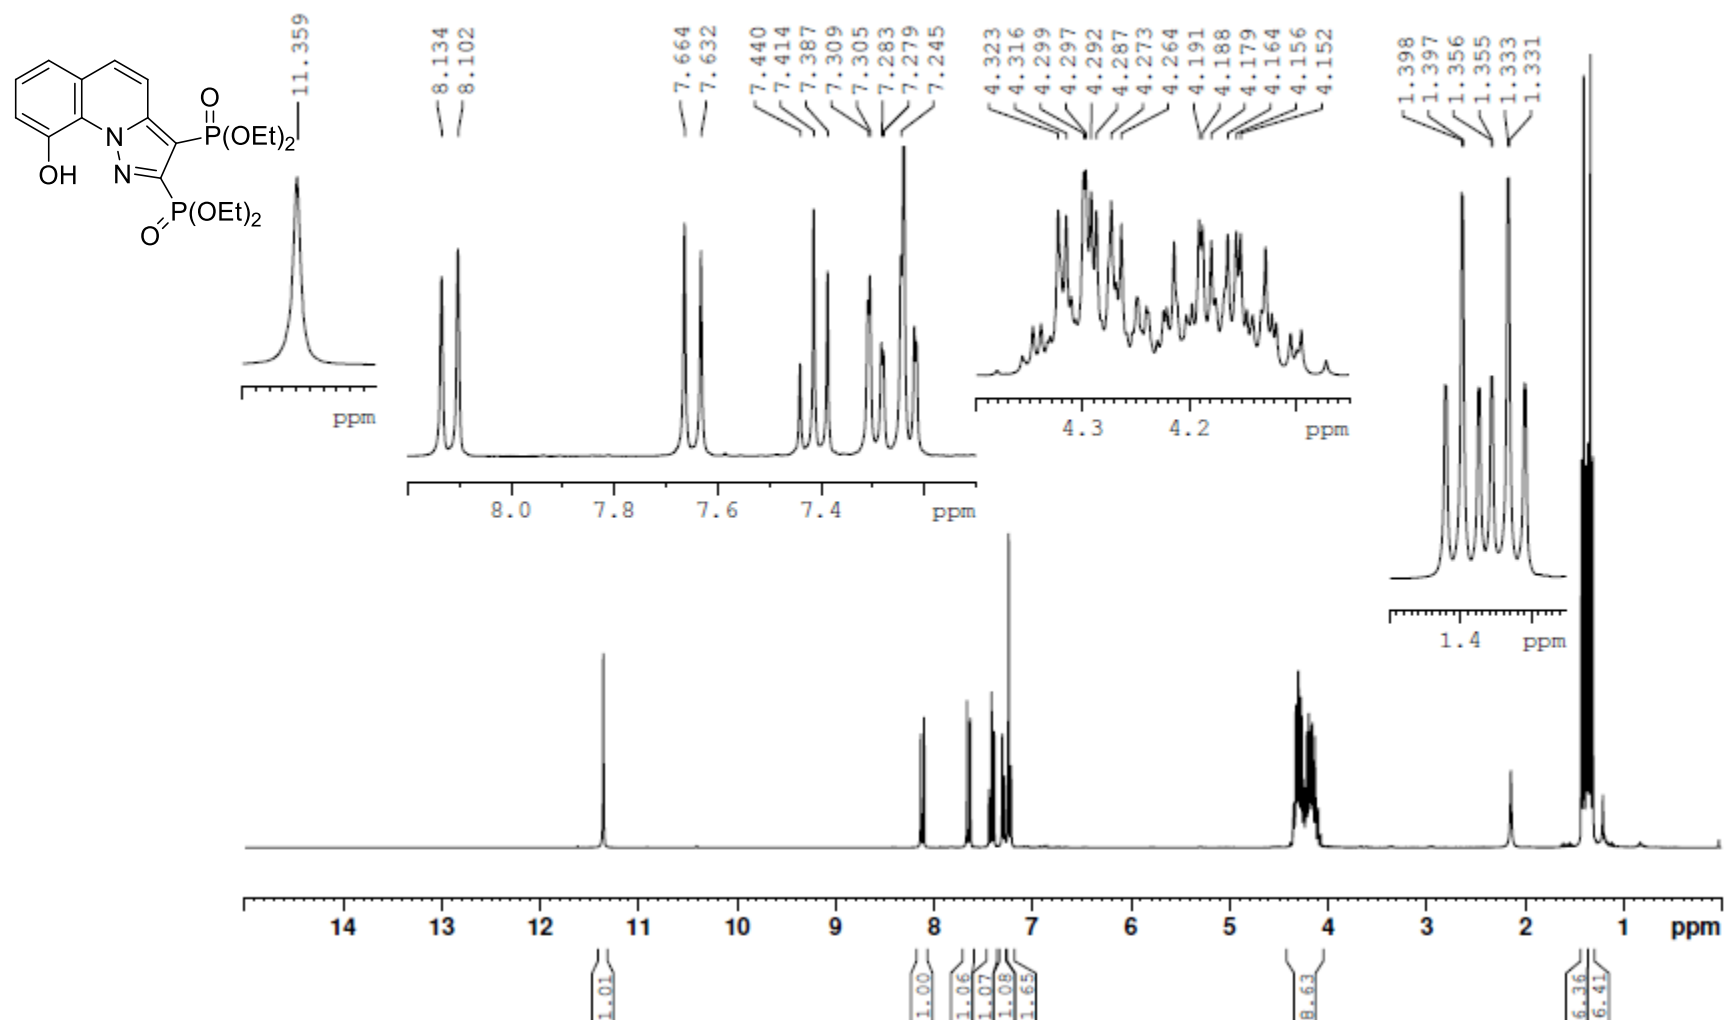

Tetraethyl (9-hydroxypyrazolo[1,5-a]quinoline-2,3-diyl)bis(phosphonate) (5h)  $^{13}\text{C}$  NMR

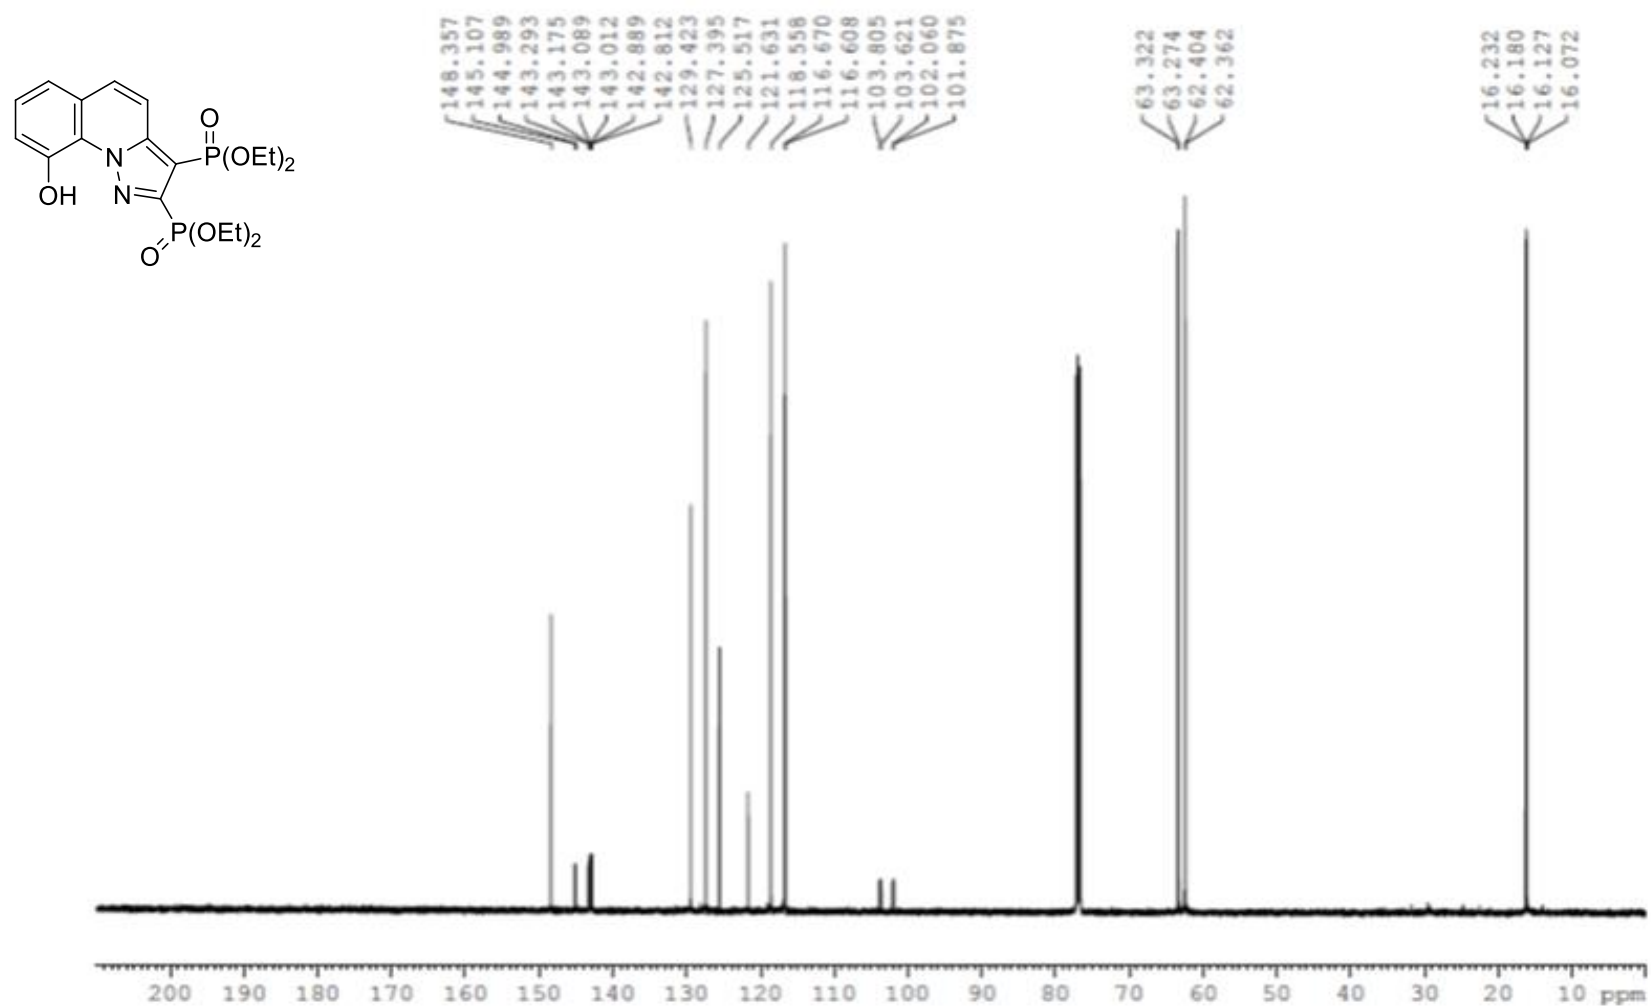

**Tetraethyl (9-hydroxypyrazolo[1,5-a]quinoline-2,3-diyl)bis(phosphonate) (5h)  $^{31}\text{P}$  NMR**

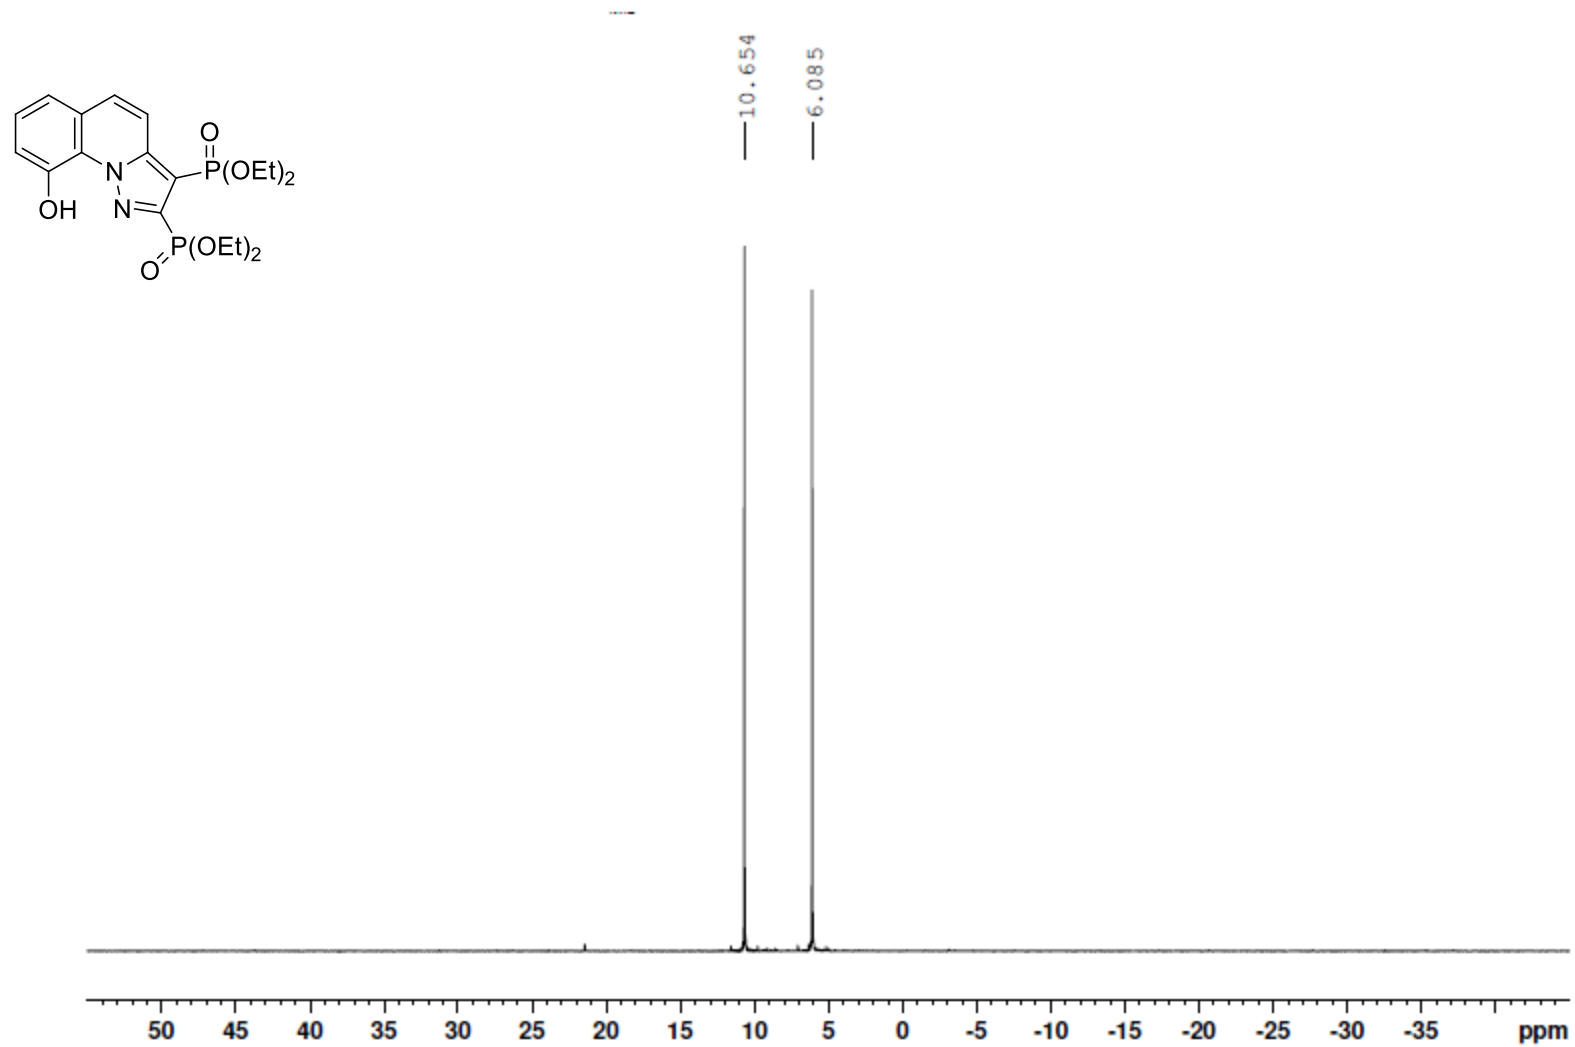

Tetraethyl pyrazolo[5,1-a]isoquinoline-1,2-diylbis(phosphonate) (5i)  $^1\text{H}$  NMR

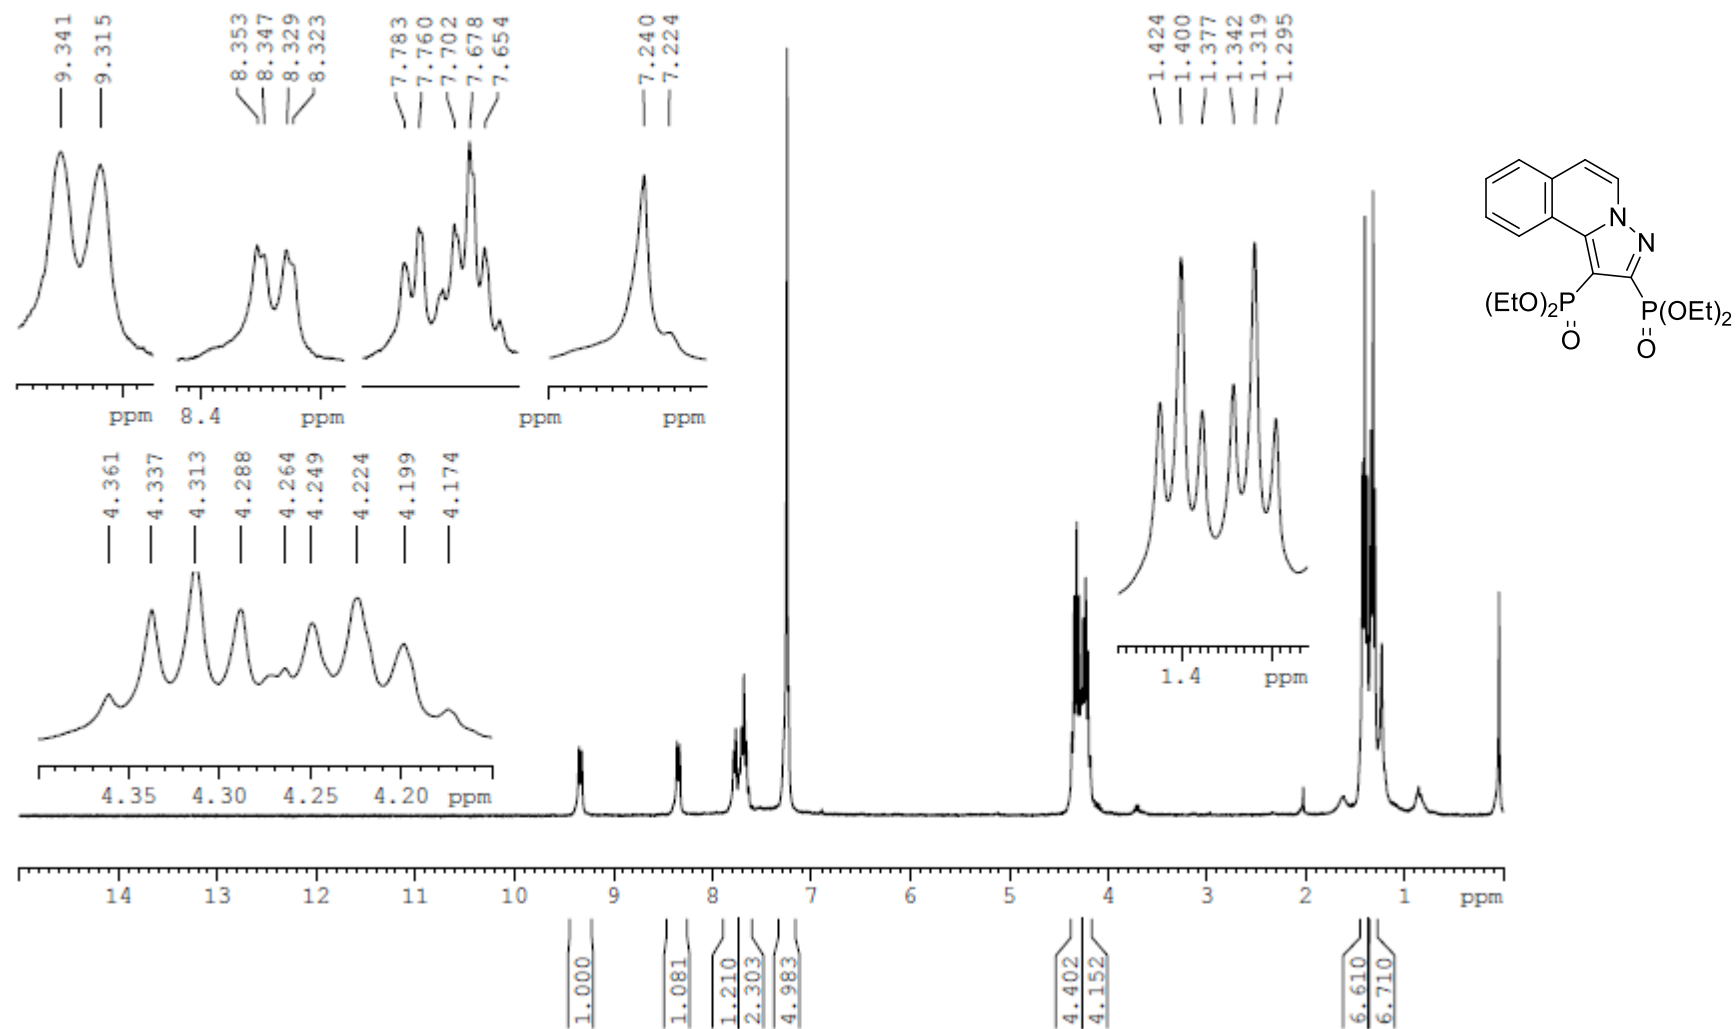

Tetraethyl pyrazolo[5,1-a]isoquinoline-1,2-diylbis(phosphonate) (5i)  $^{13}\text{C}$  NMR

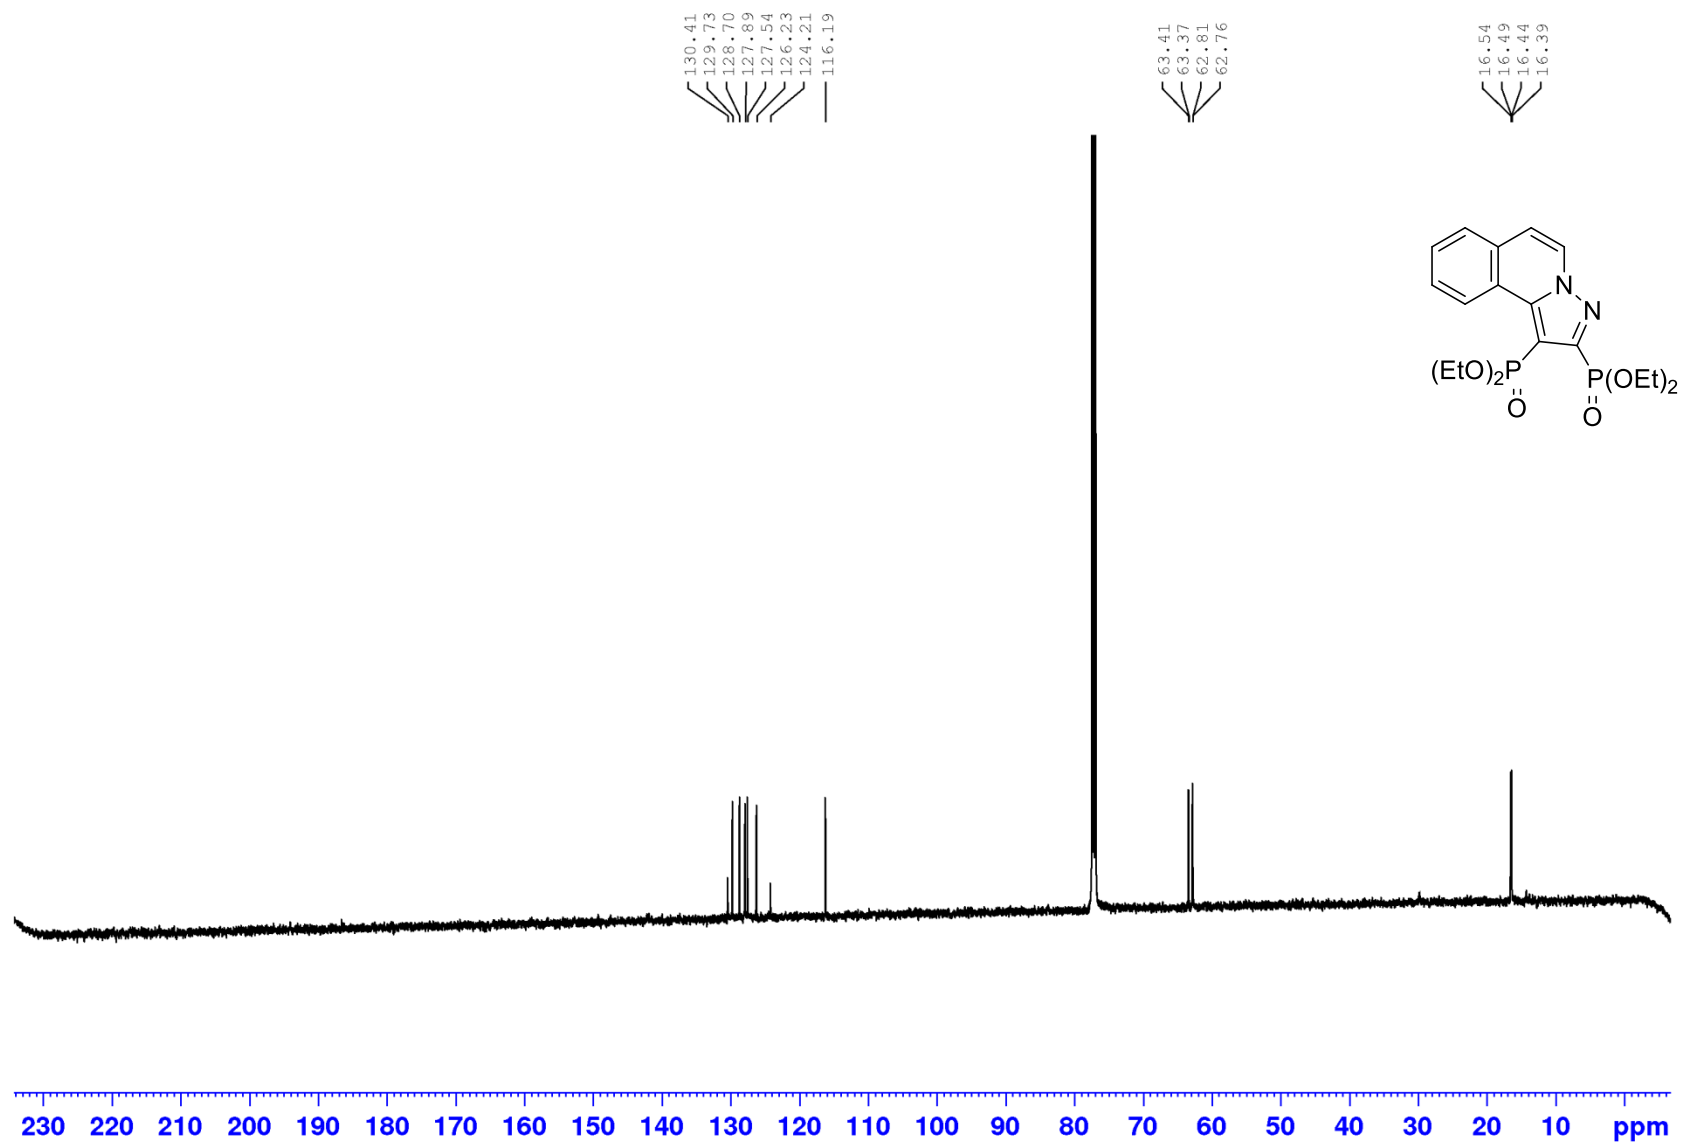

**Tetraethyl pyrazolo[5,1-a]isoquinoline-1,2-diylbis(phosphonate) (5i)  $^{31}\text{P}$  NMR**

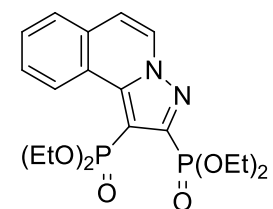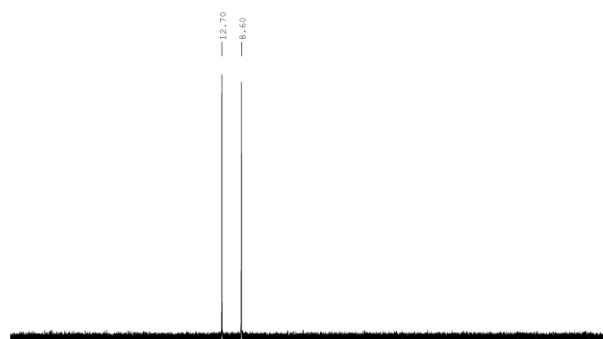

Tetraethyl pyrazolo[1,5-a][1,10]phenanthroline-2,3-diylbis(phosphonate) (5j)  $^1\text{H}$  NMR

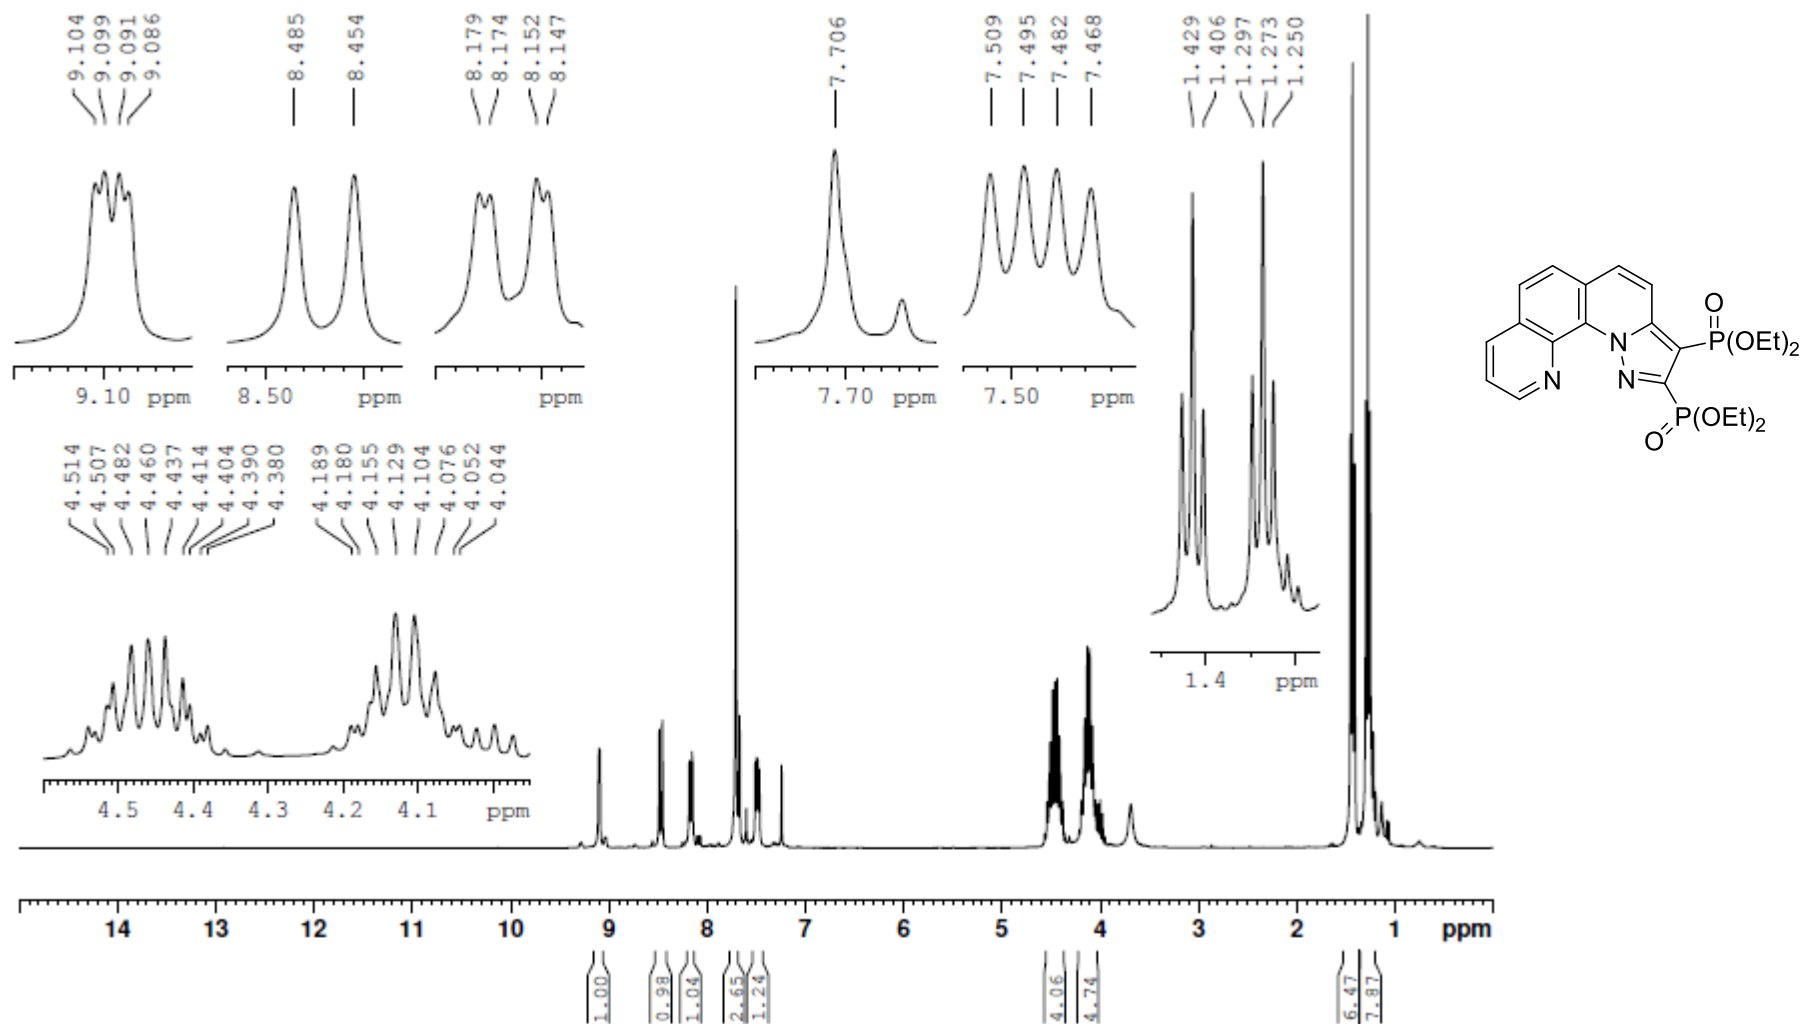



Tetraethyl pyrazolo[1,5-a][1,10]phenanthroline-2,3-diylbis(phosphonate) (5j)  $^{13}\text{C}$  NMR

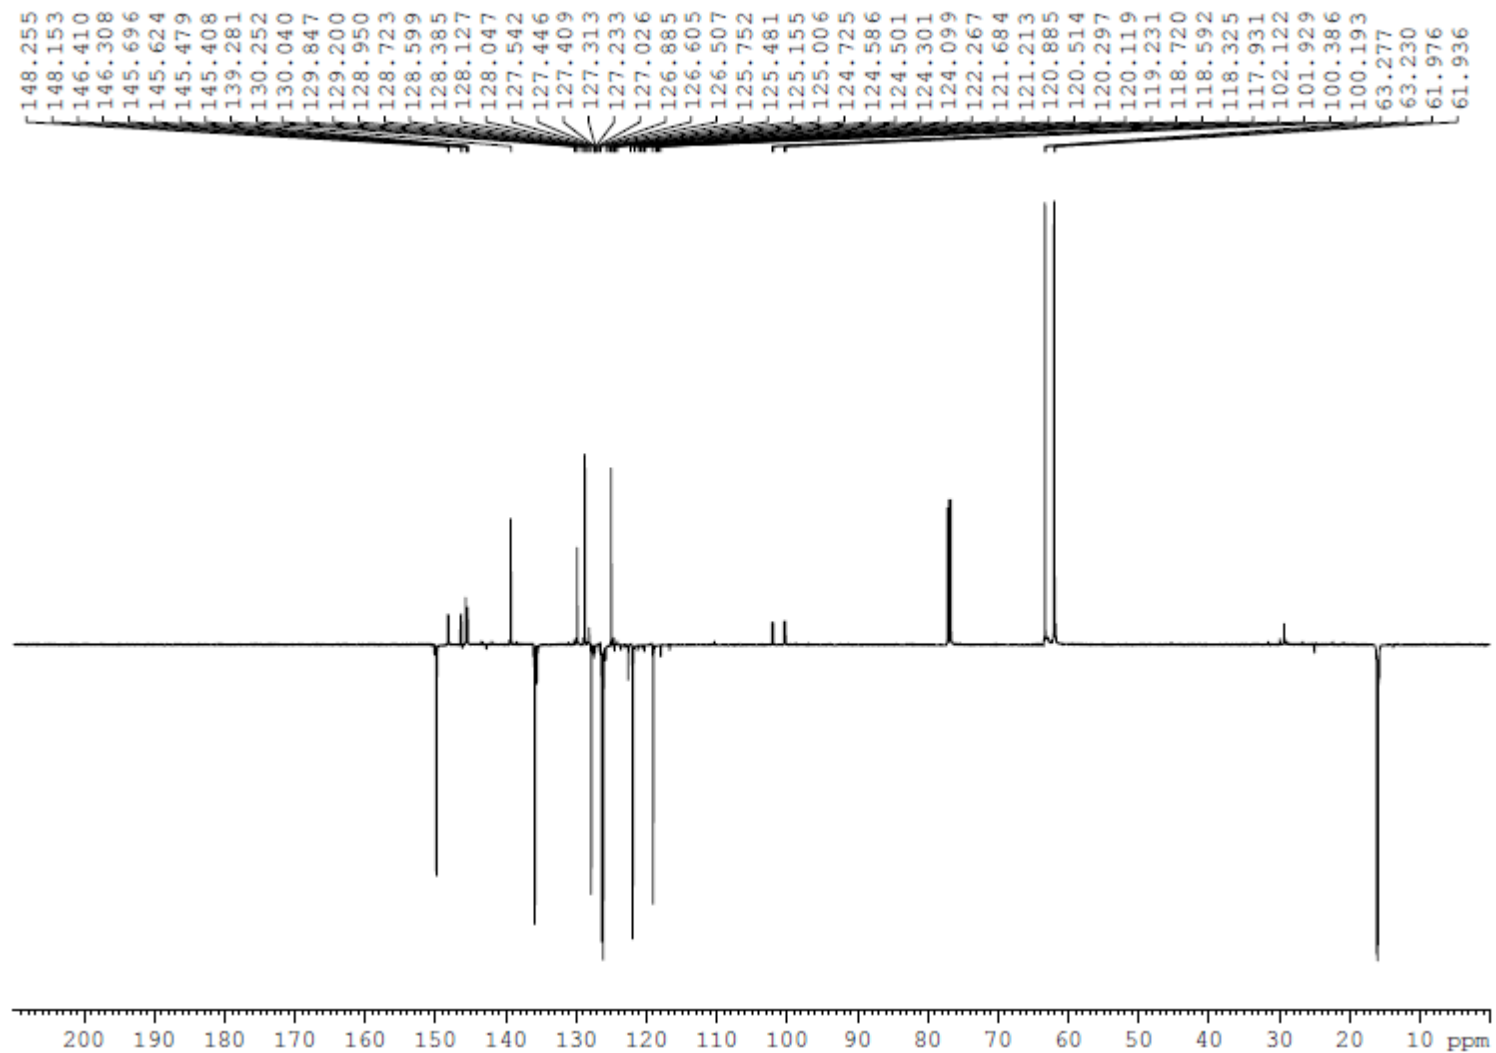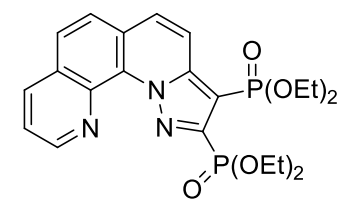

Tetraethyl pyrazolo[1,5-a][1,10]phenanthroline-2,3-diylbis(phosphonate) (5j)  $^{31}\text{P}$  NMR

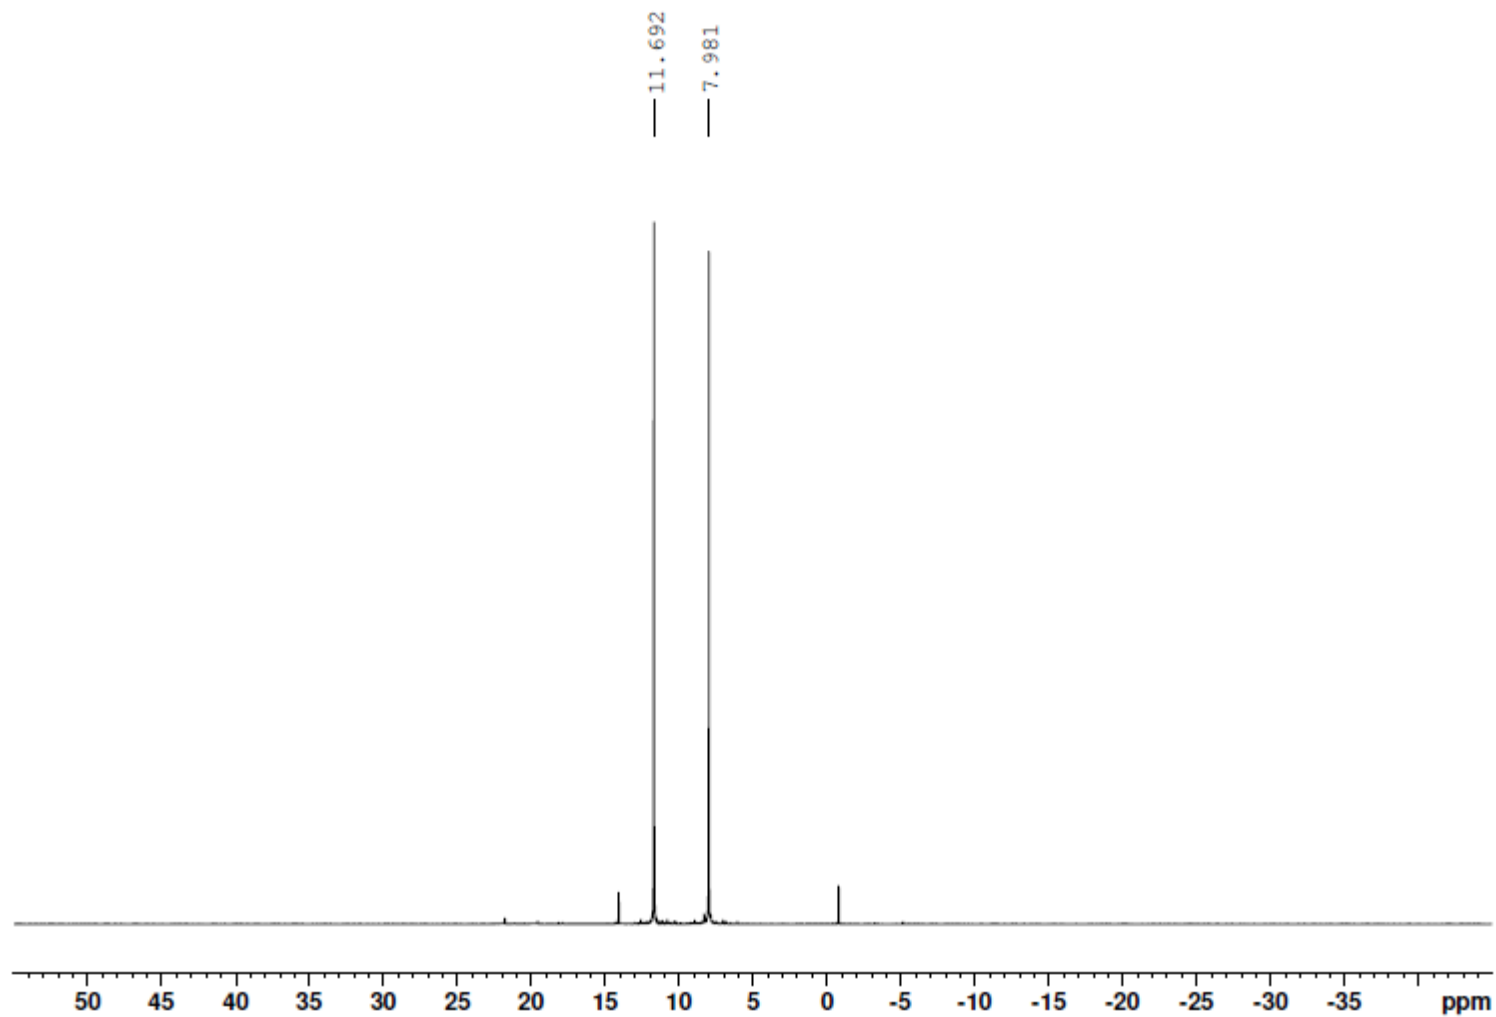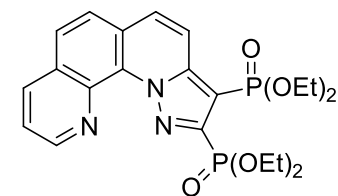

Diethyl (pyrazolo[1,5-a]pyridin-3-yl)phosphonate <sup>1</sup>H NMR (5k).

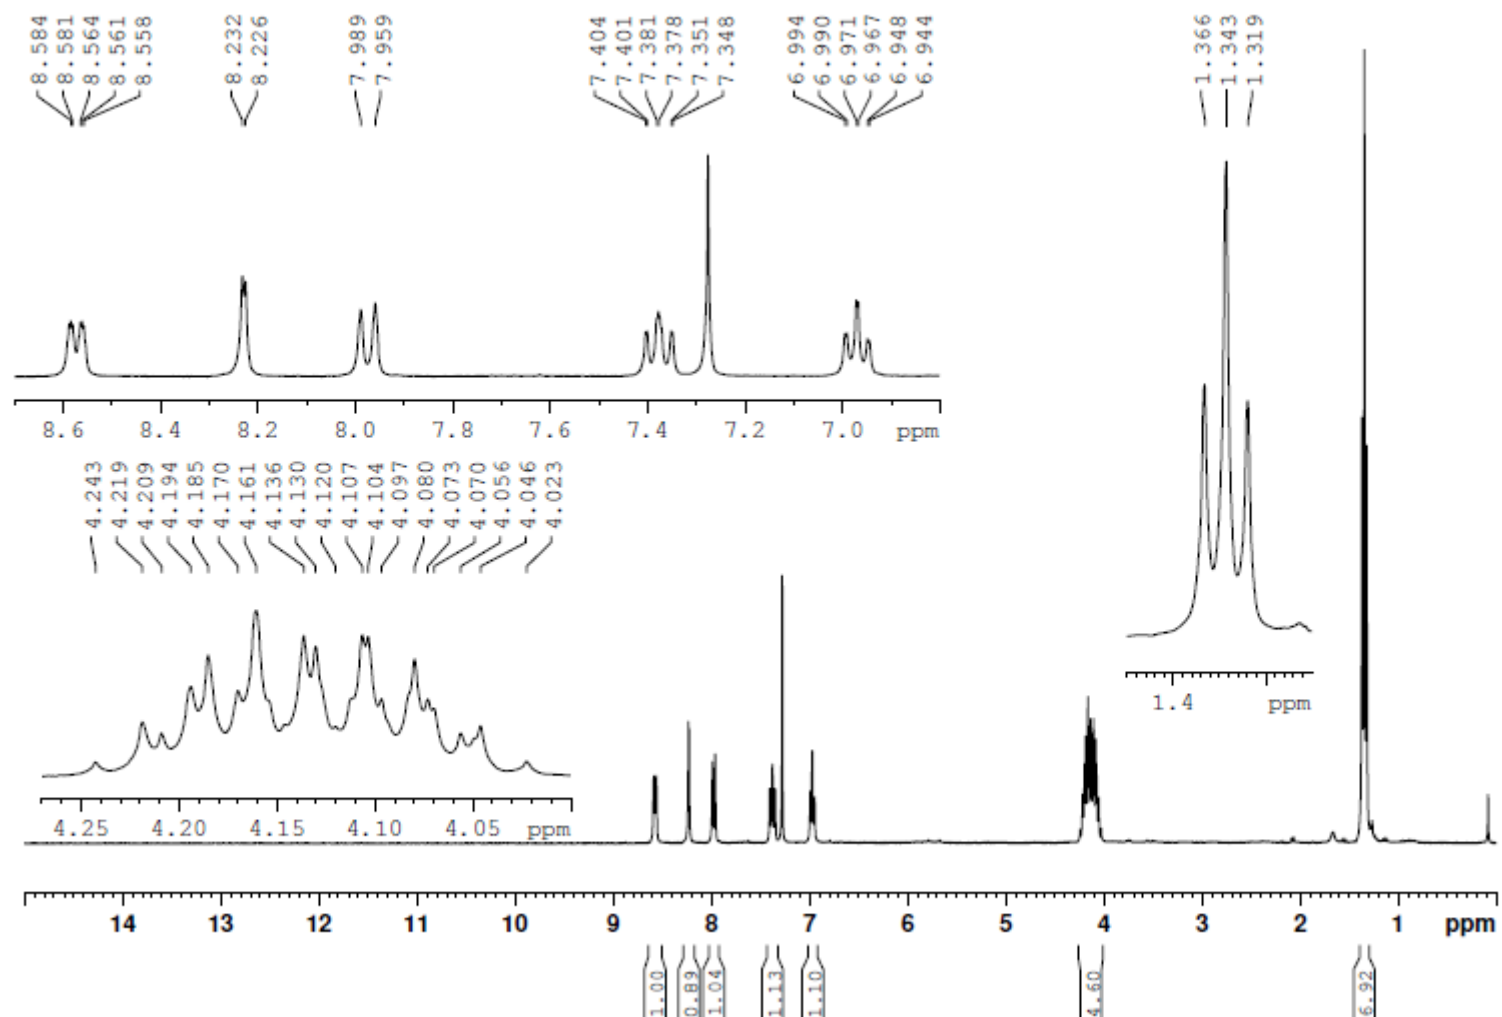

Diethyl (pyrazolo[1,5-a]pyridin-3-yl)phosphonate  $^{13}\text{C}$  NMR (5k).

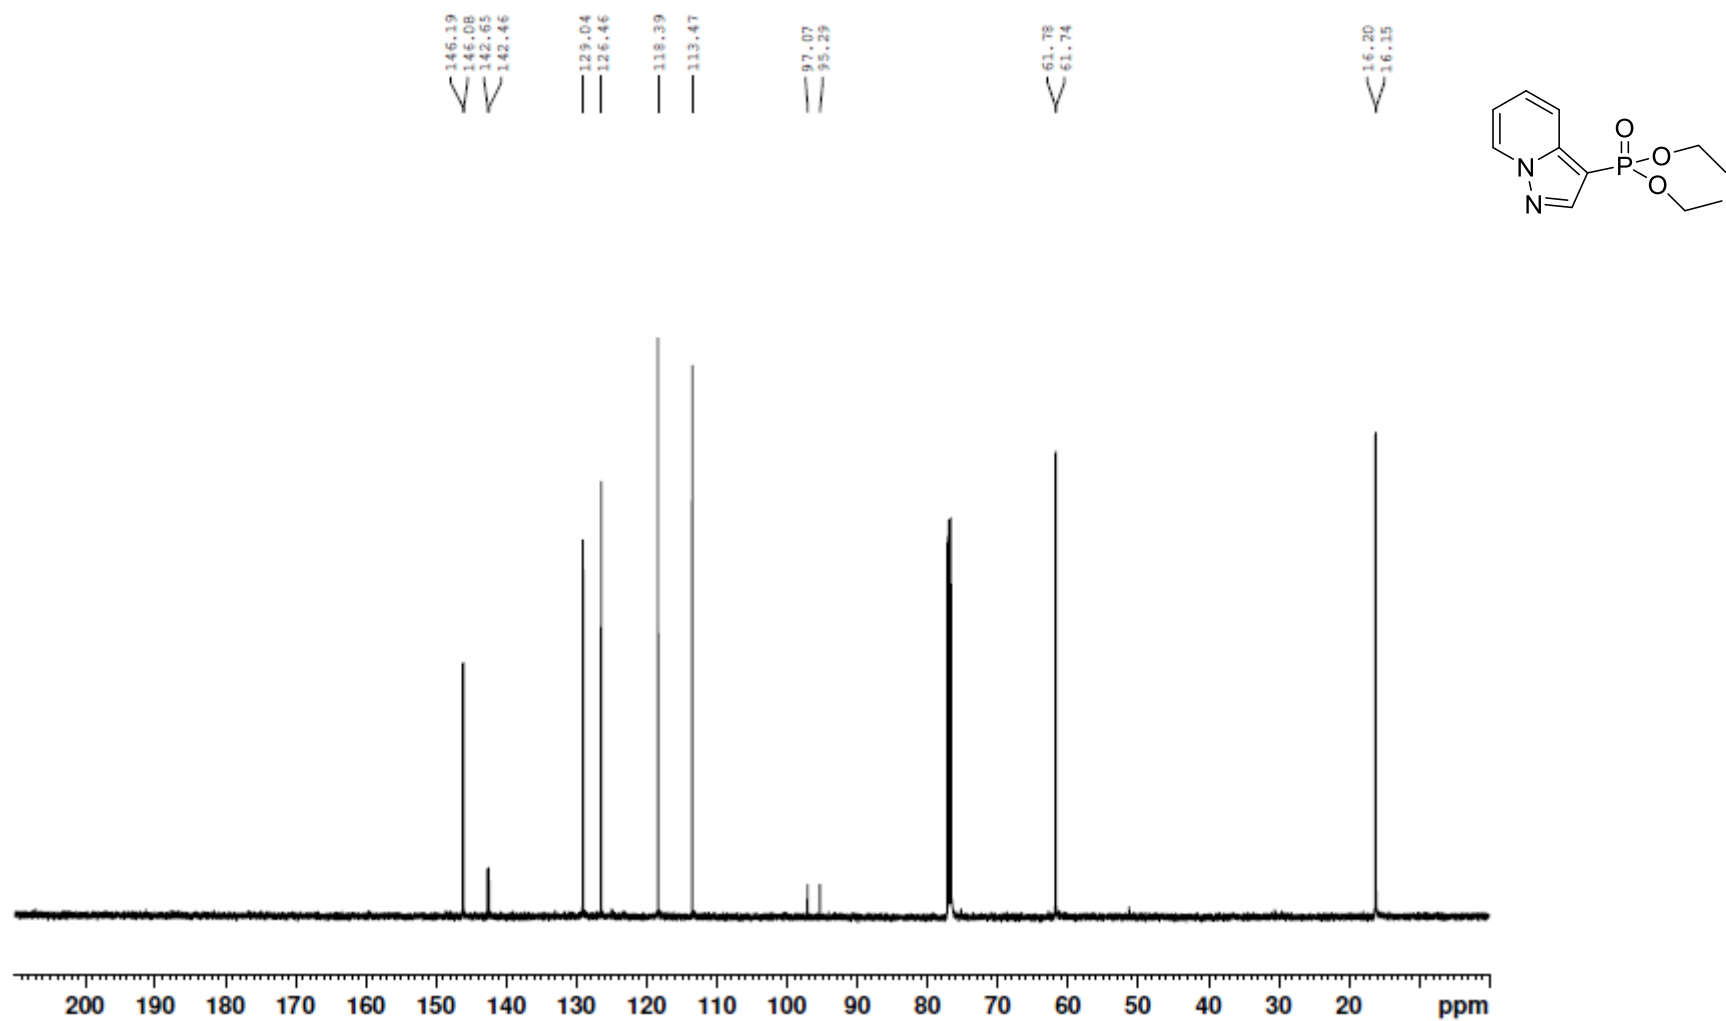

Diethyl (pyrazolo[1,5-a]pyridin-3-yl)phosphonate  $^{31}\text{P}$  NMR (5k).

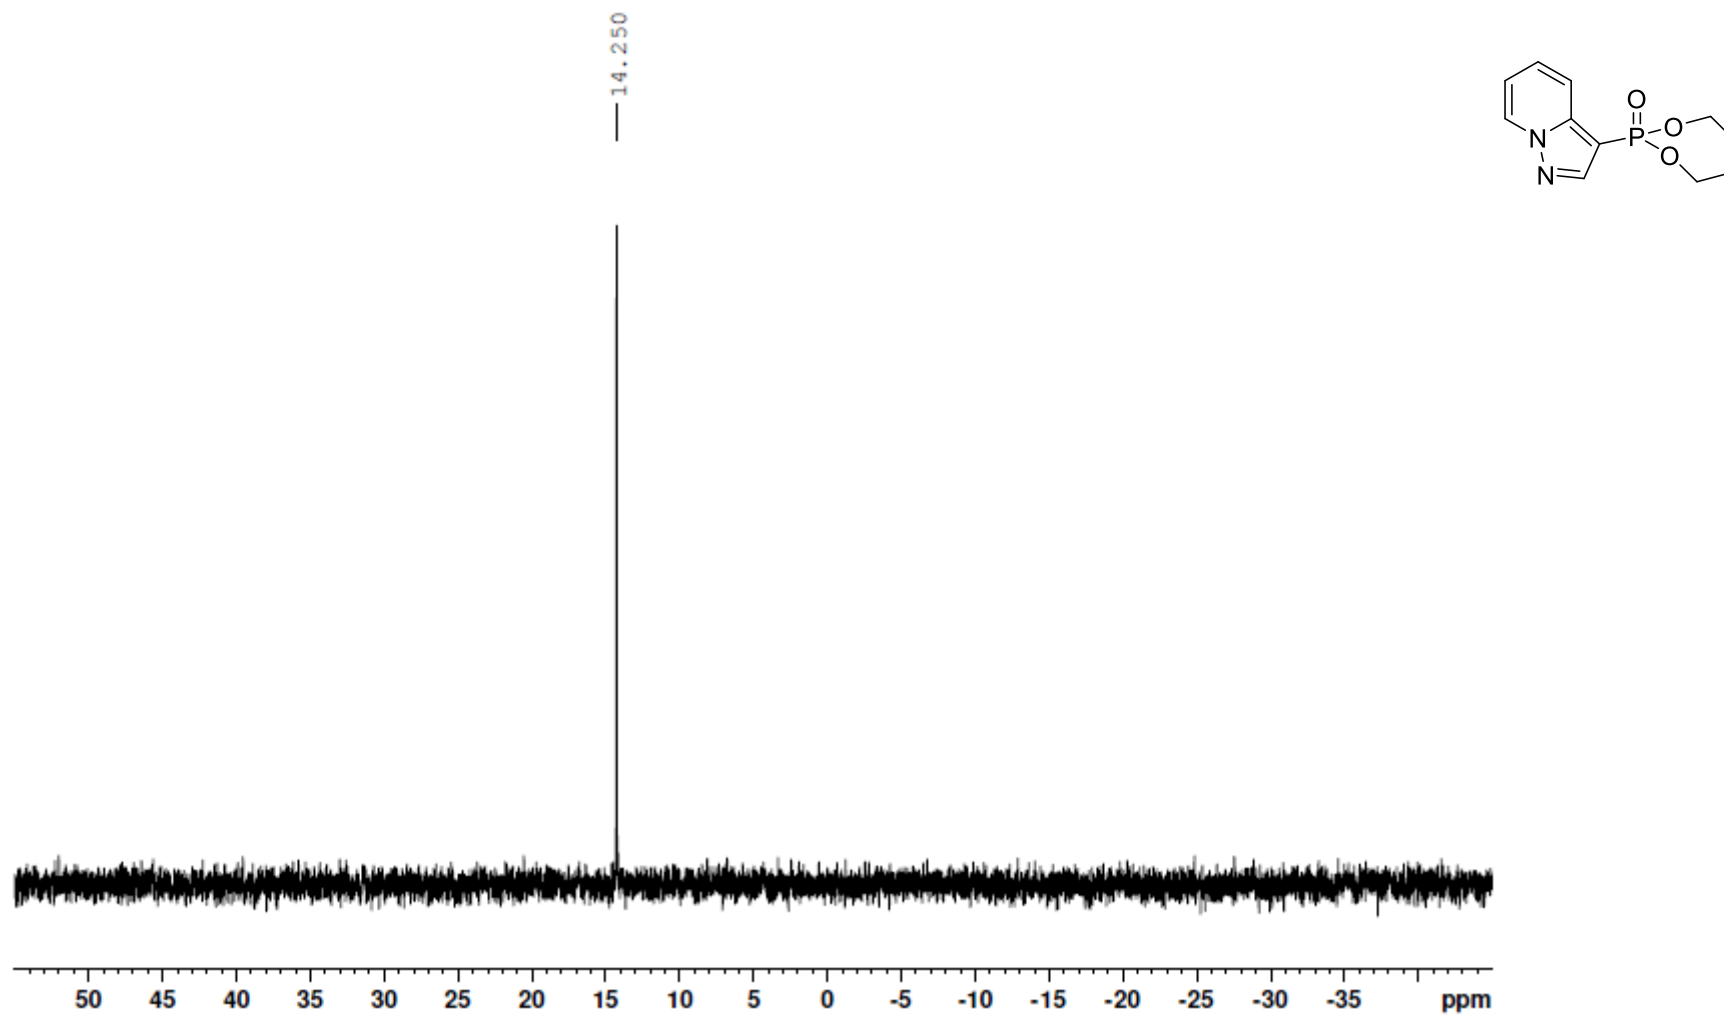

**Diethyl (5-methylpyrazolo[1,5-a]pyridin-3-yl)phosphonate (5l)  $^1\text{H}$  NMR.**

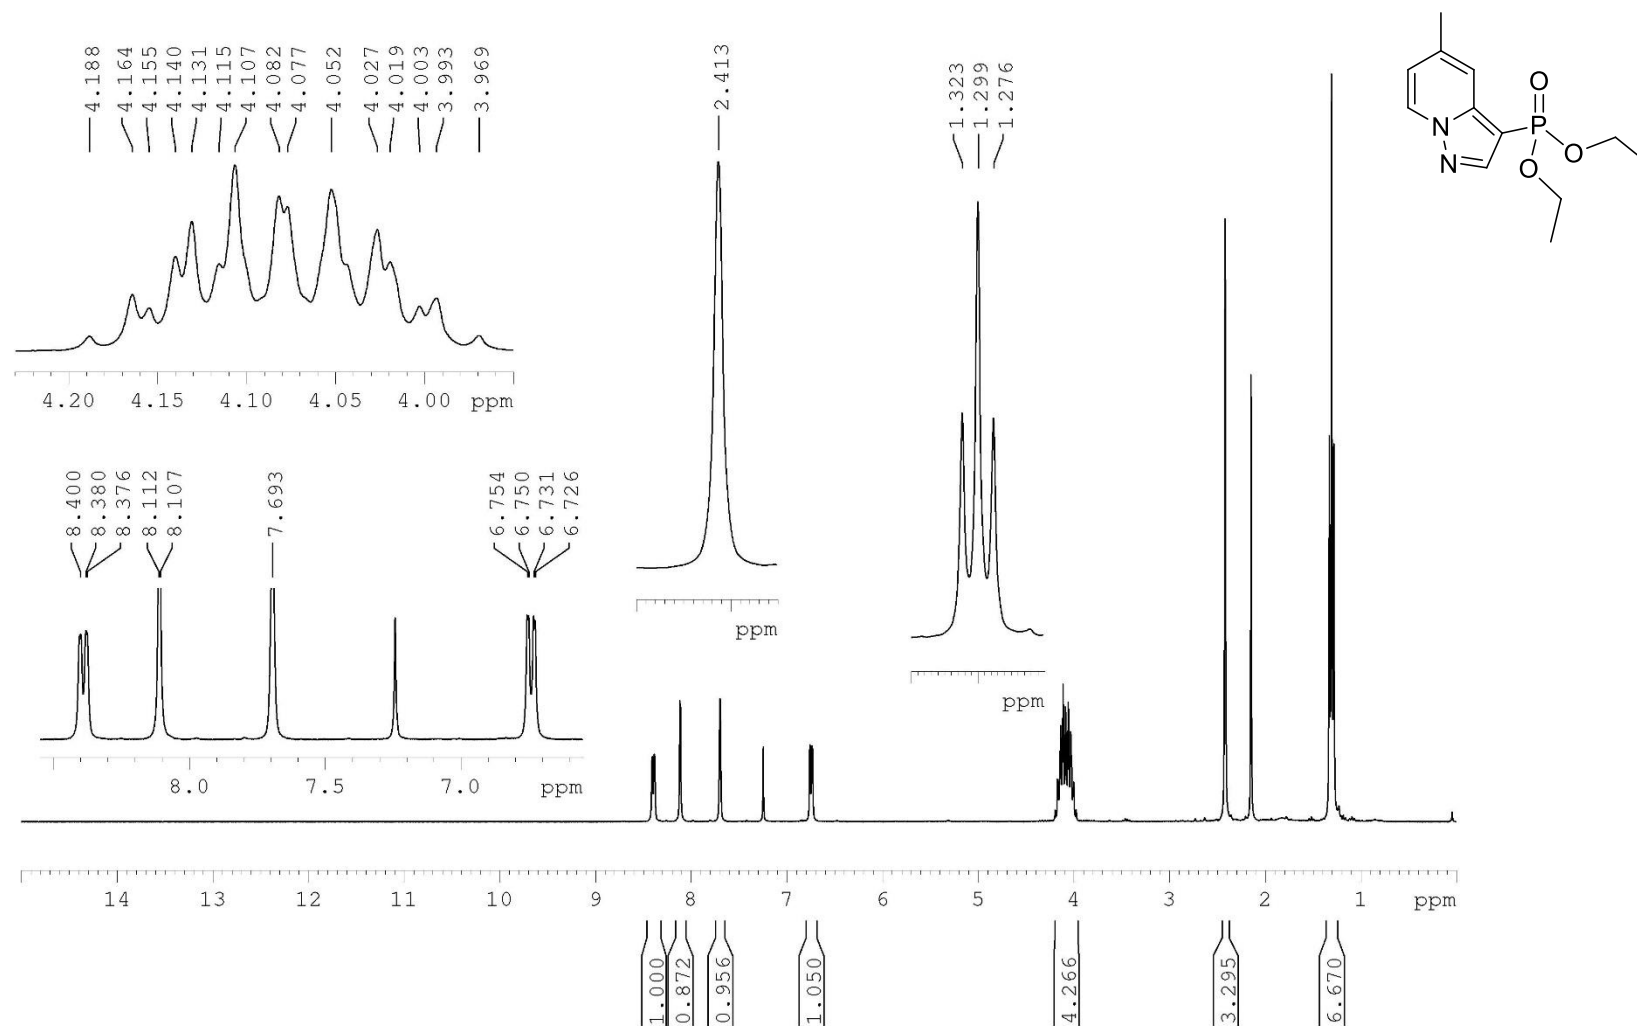

Diethyl (5-methylpyrazolo[1,5-a]pyridin-3-yl)phosphonate (5l)  $^{13}\text{C}$  NMR.

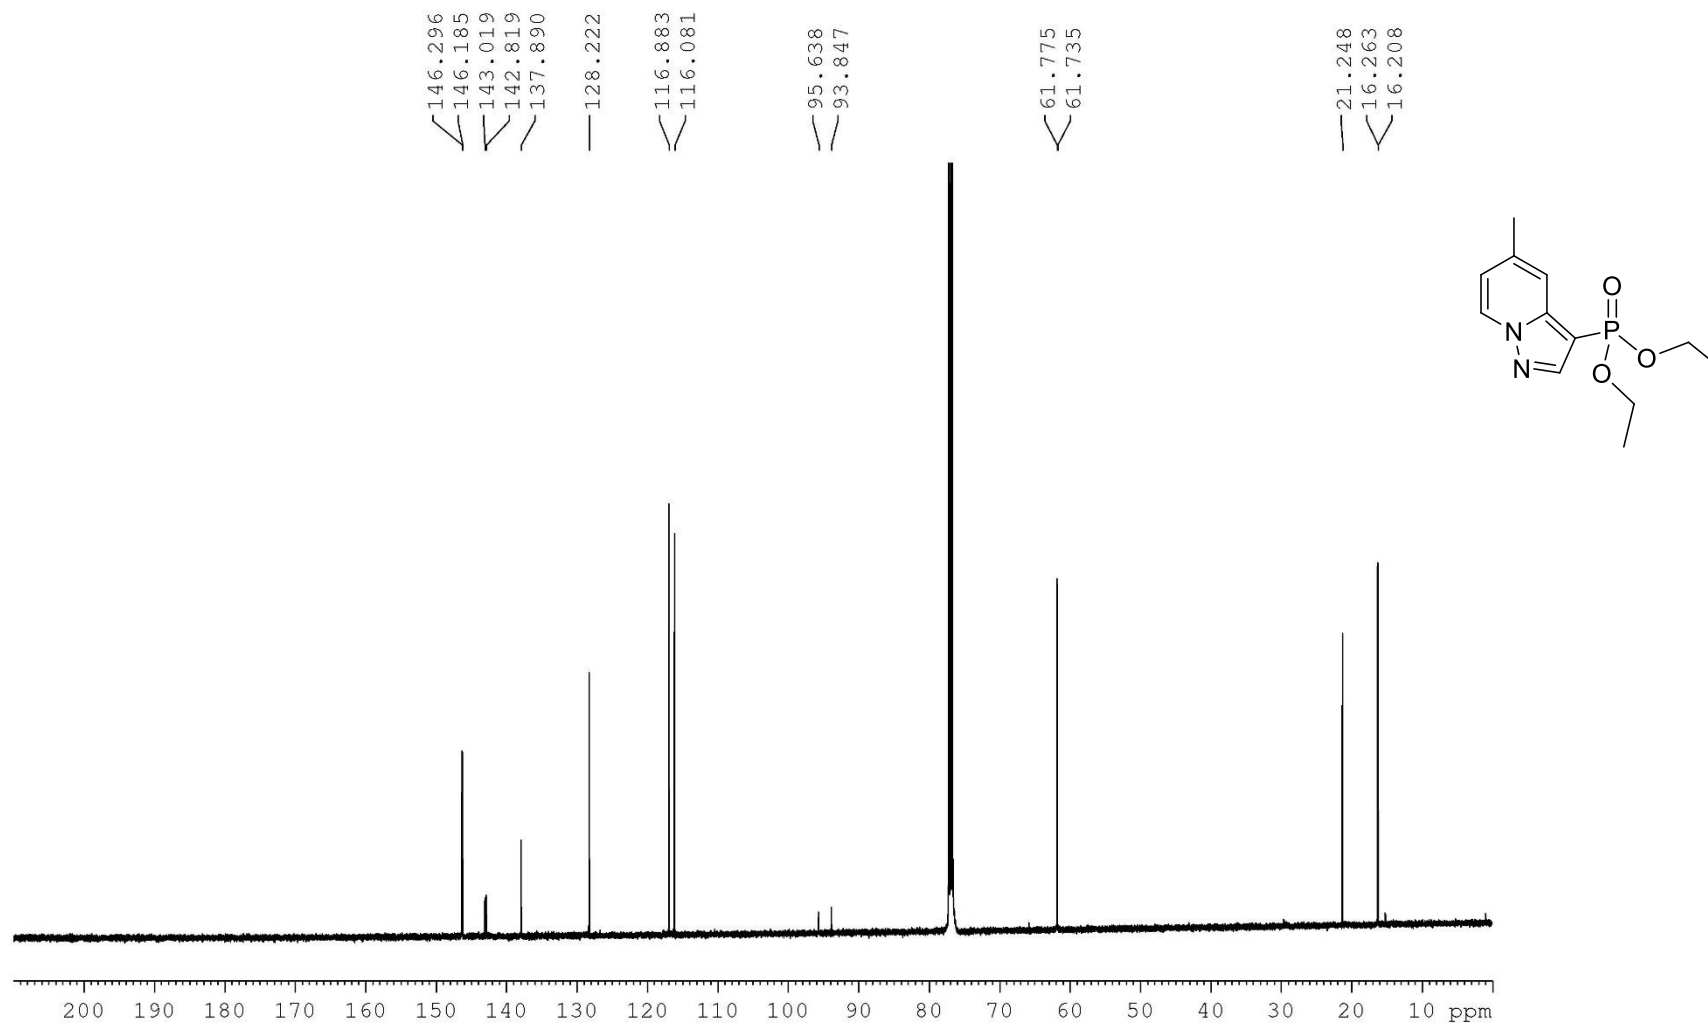

**Diethyl (5-methylpyrazolo[1,5-a]pyridin-3-yl)phosphonate (5l)  $^{31}\text{P}$  NMR.**

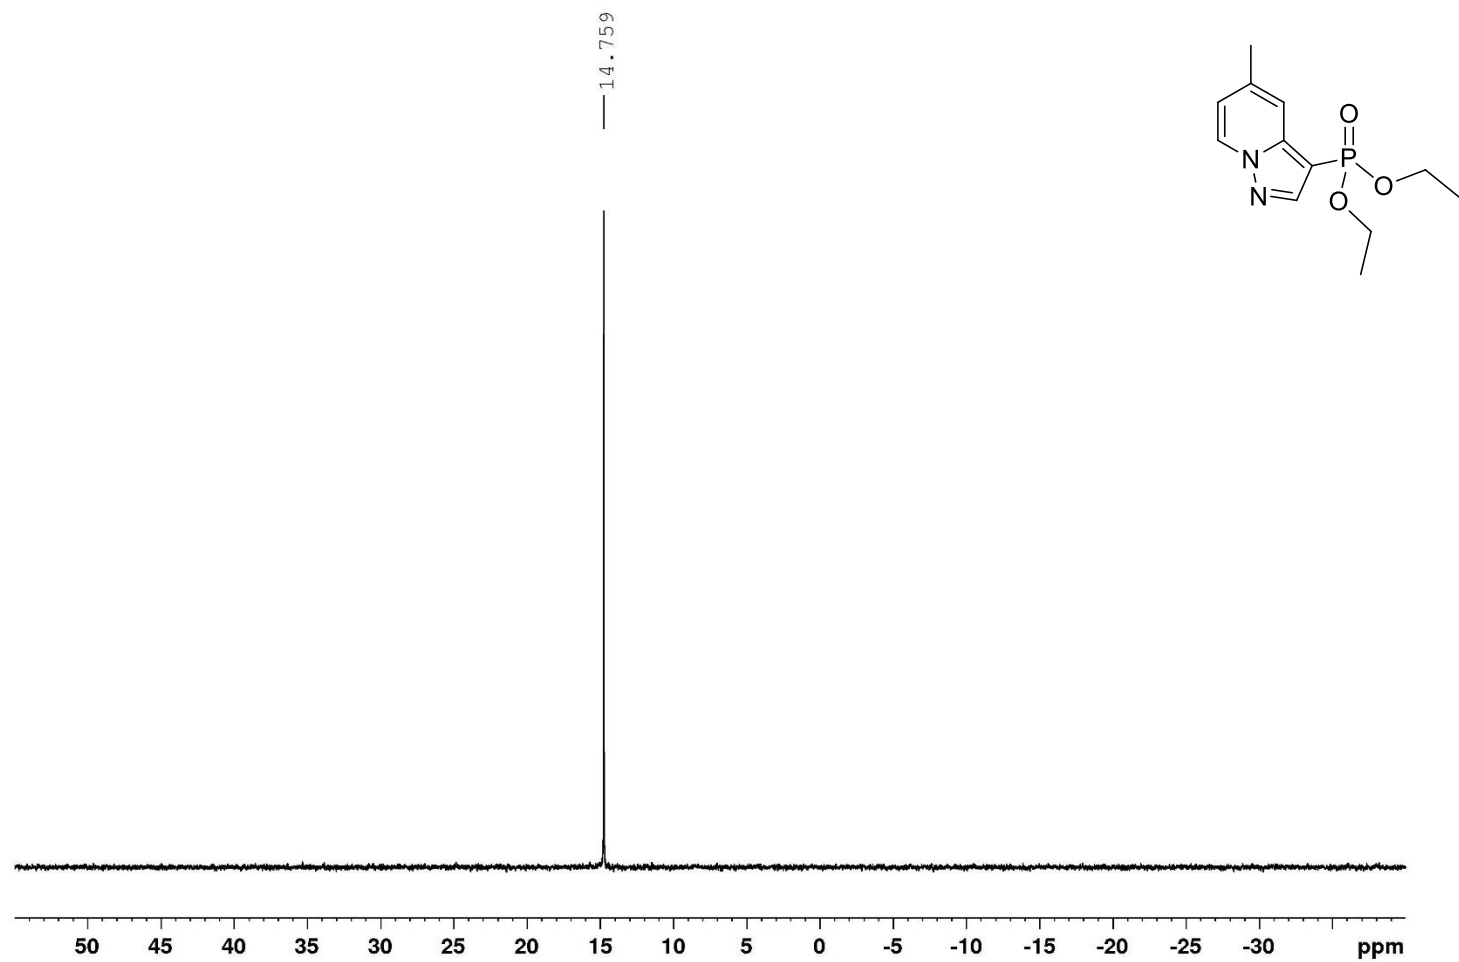



**Diethyl (7-methylpyrazolo[1,5-a]pyridin-3-yl)phosphonate (5m)  $^1\text{H}$  NMR.**

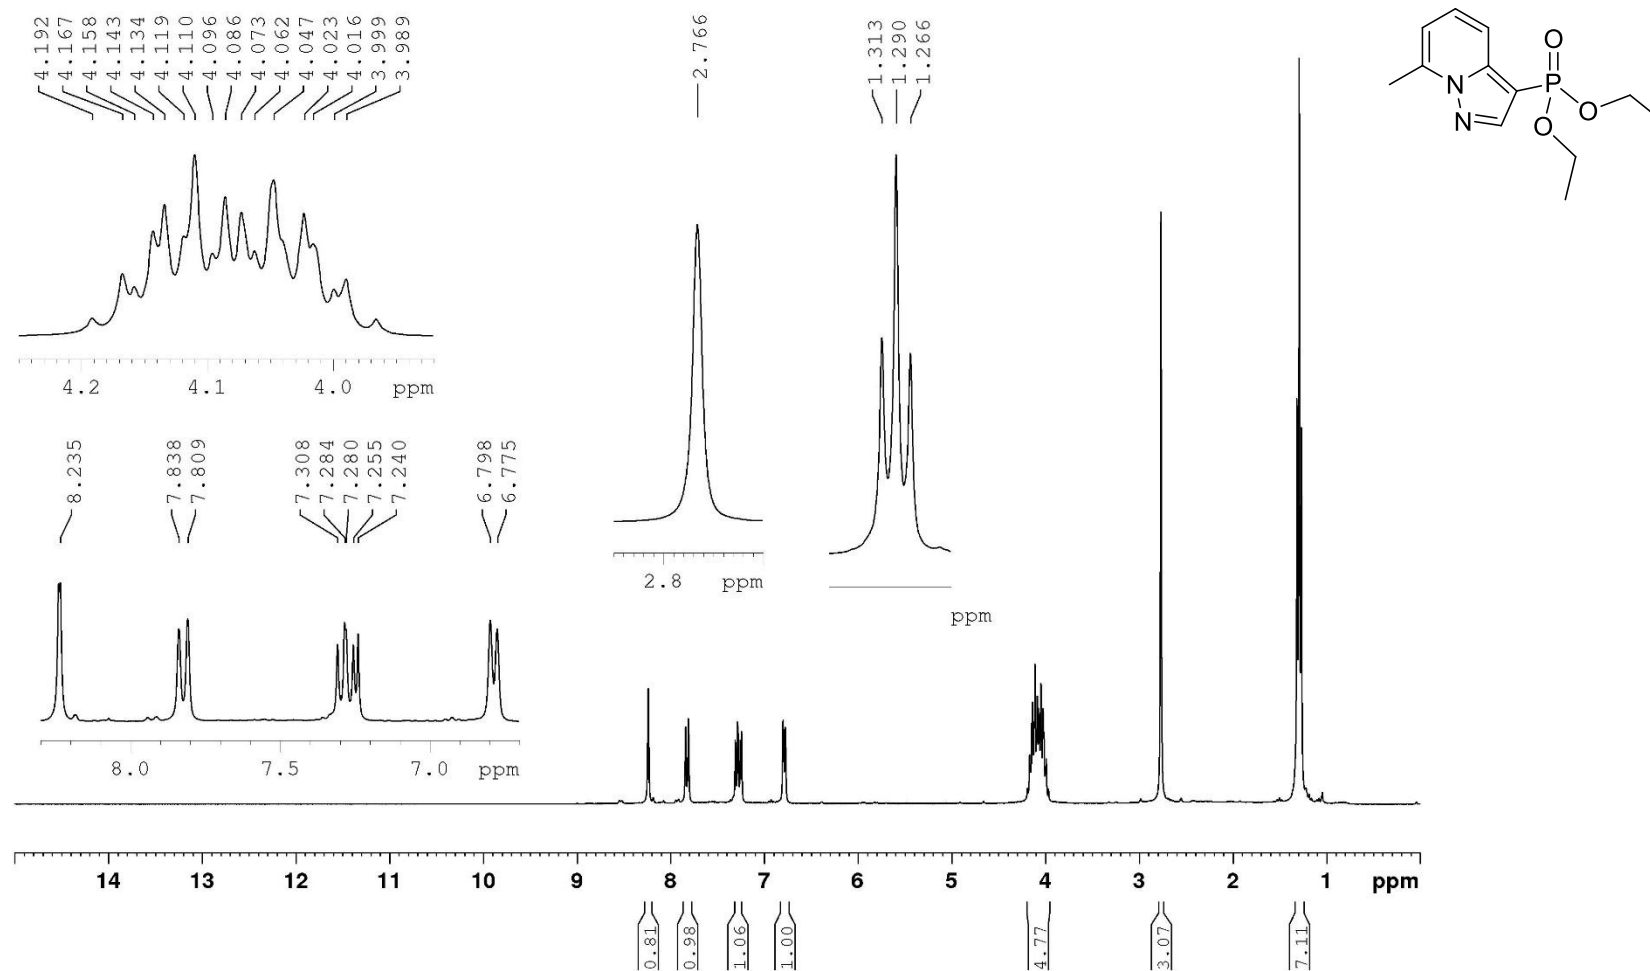

Diethyl (7-methylpyrazolo[1,5-a]pyridin-3-yl)phosphonate (5m)  $^{13}\text{C}$  NMR.

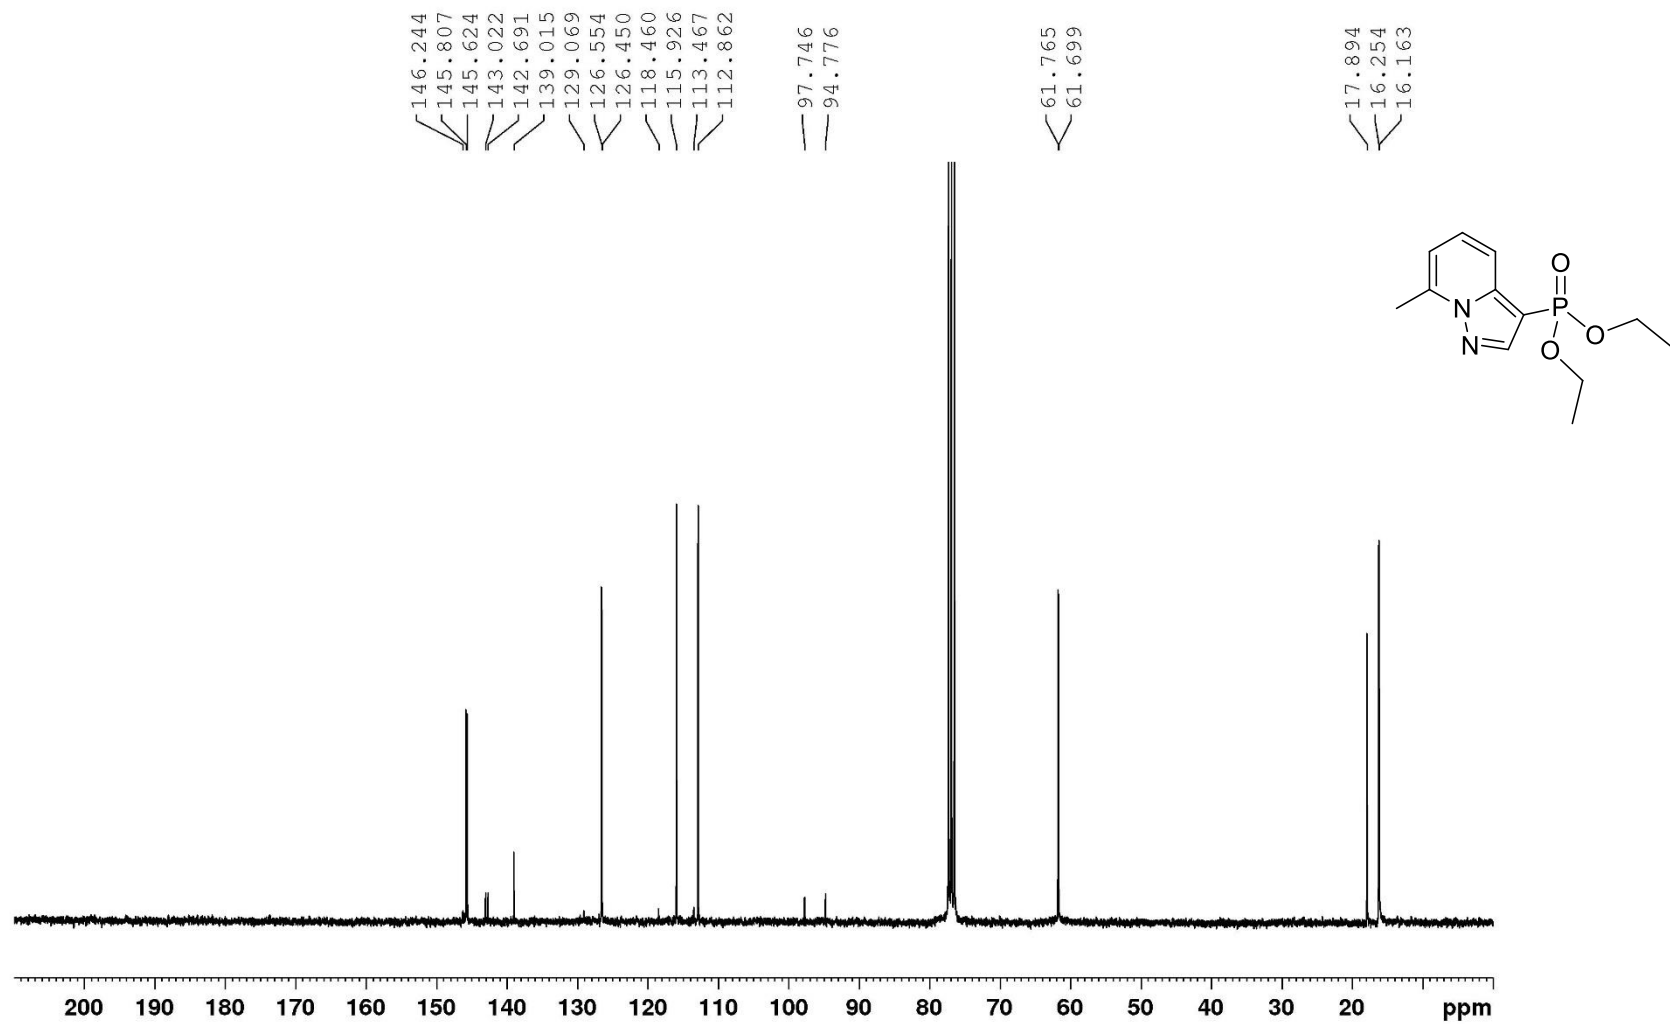

**Diethyl (7-methylpyrazolo[1,5-a]pyridin-3-yl)phosphonate (5m)  $^{31}\text{P}$  NMR.**

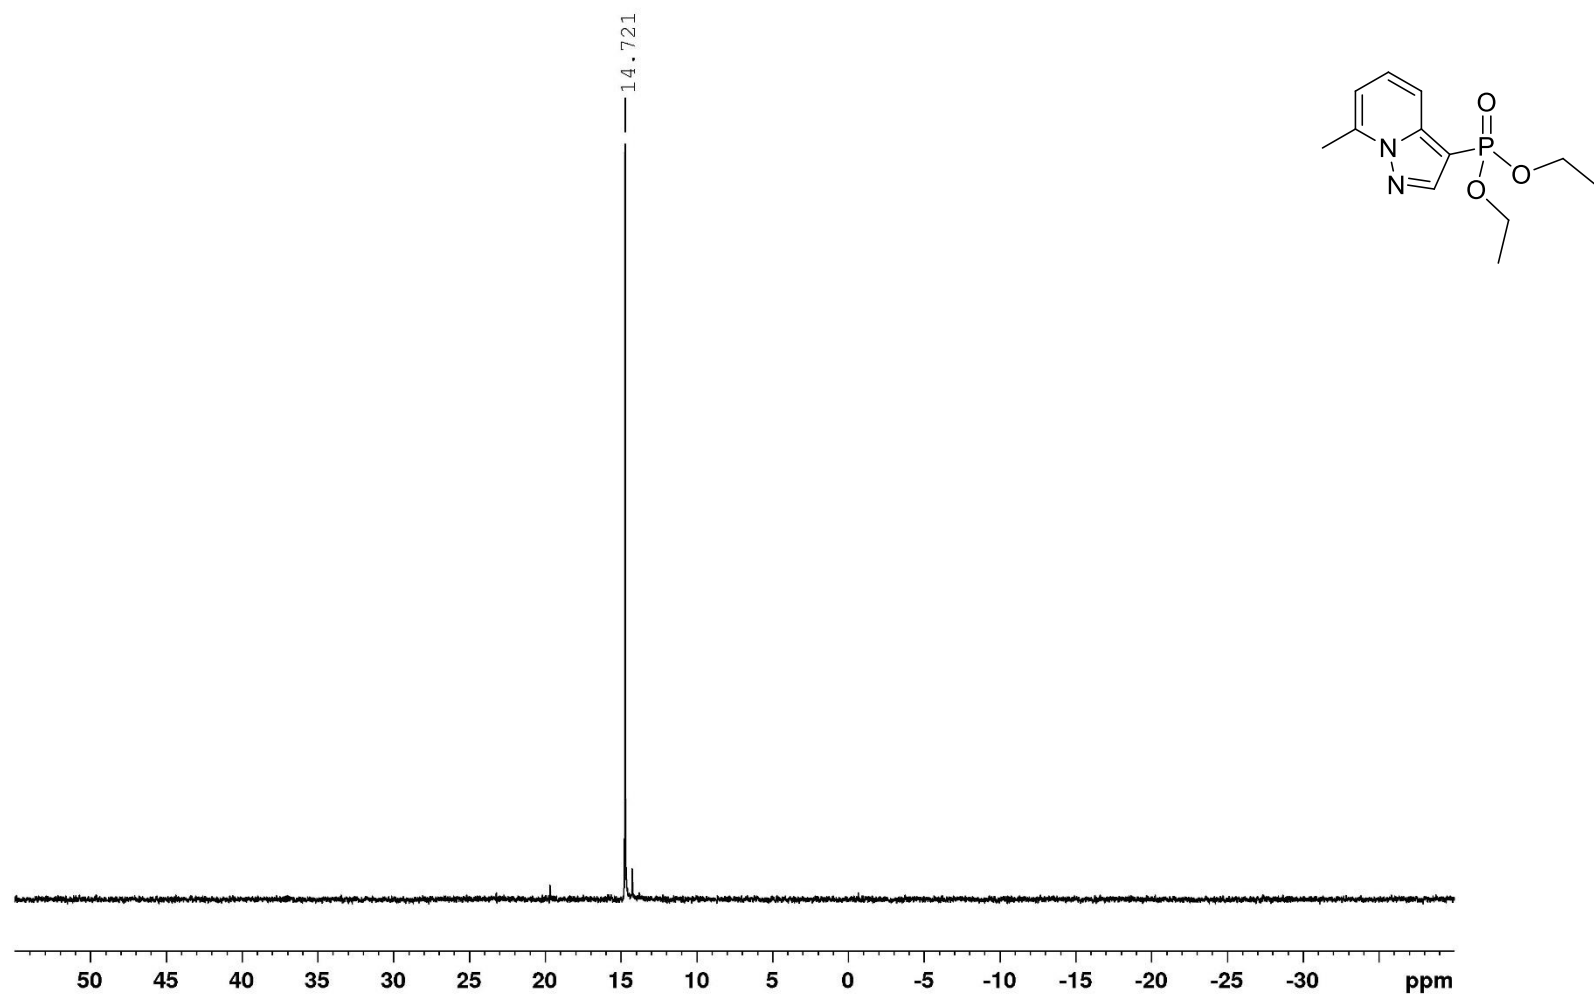

**Diethyl (7-phenylpyrazolo[1,5-a]pyridin-3-yl)phosphonate (5n)  $^1\text{H}$  NMR.**

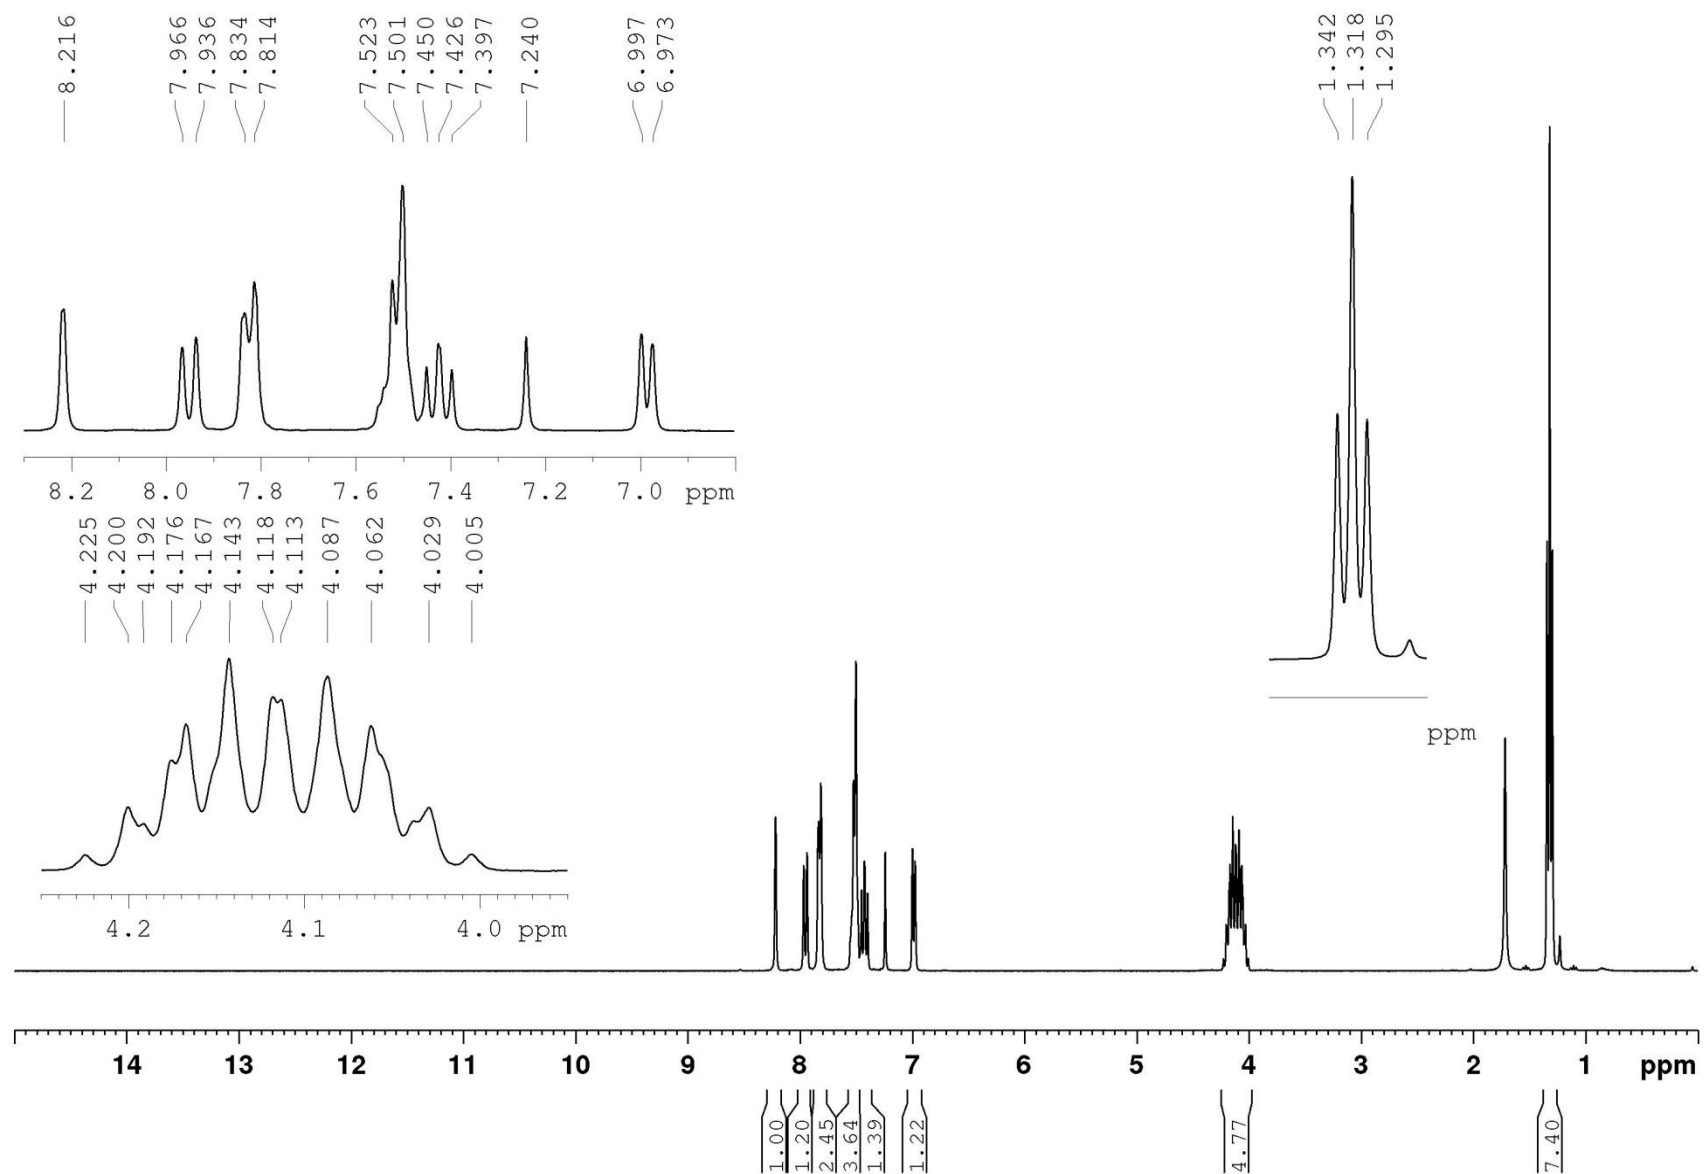

**Diethyl (7-phenylpyrazolo[1,5-a]pyridin-3-yl)phosphonate (5n)  $^{13}\text{C}$  NMR.**

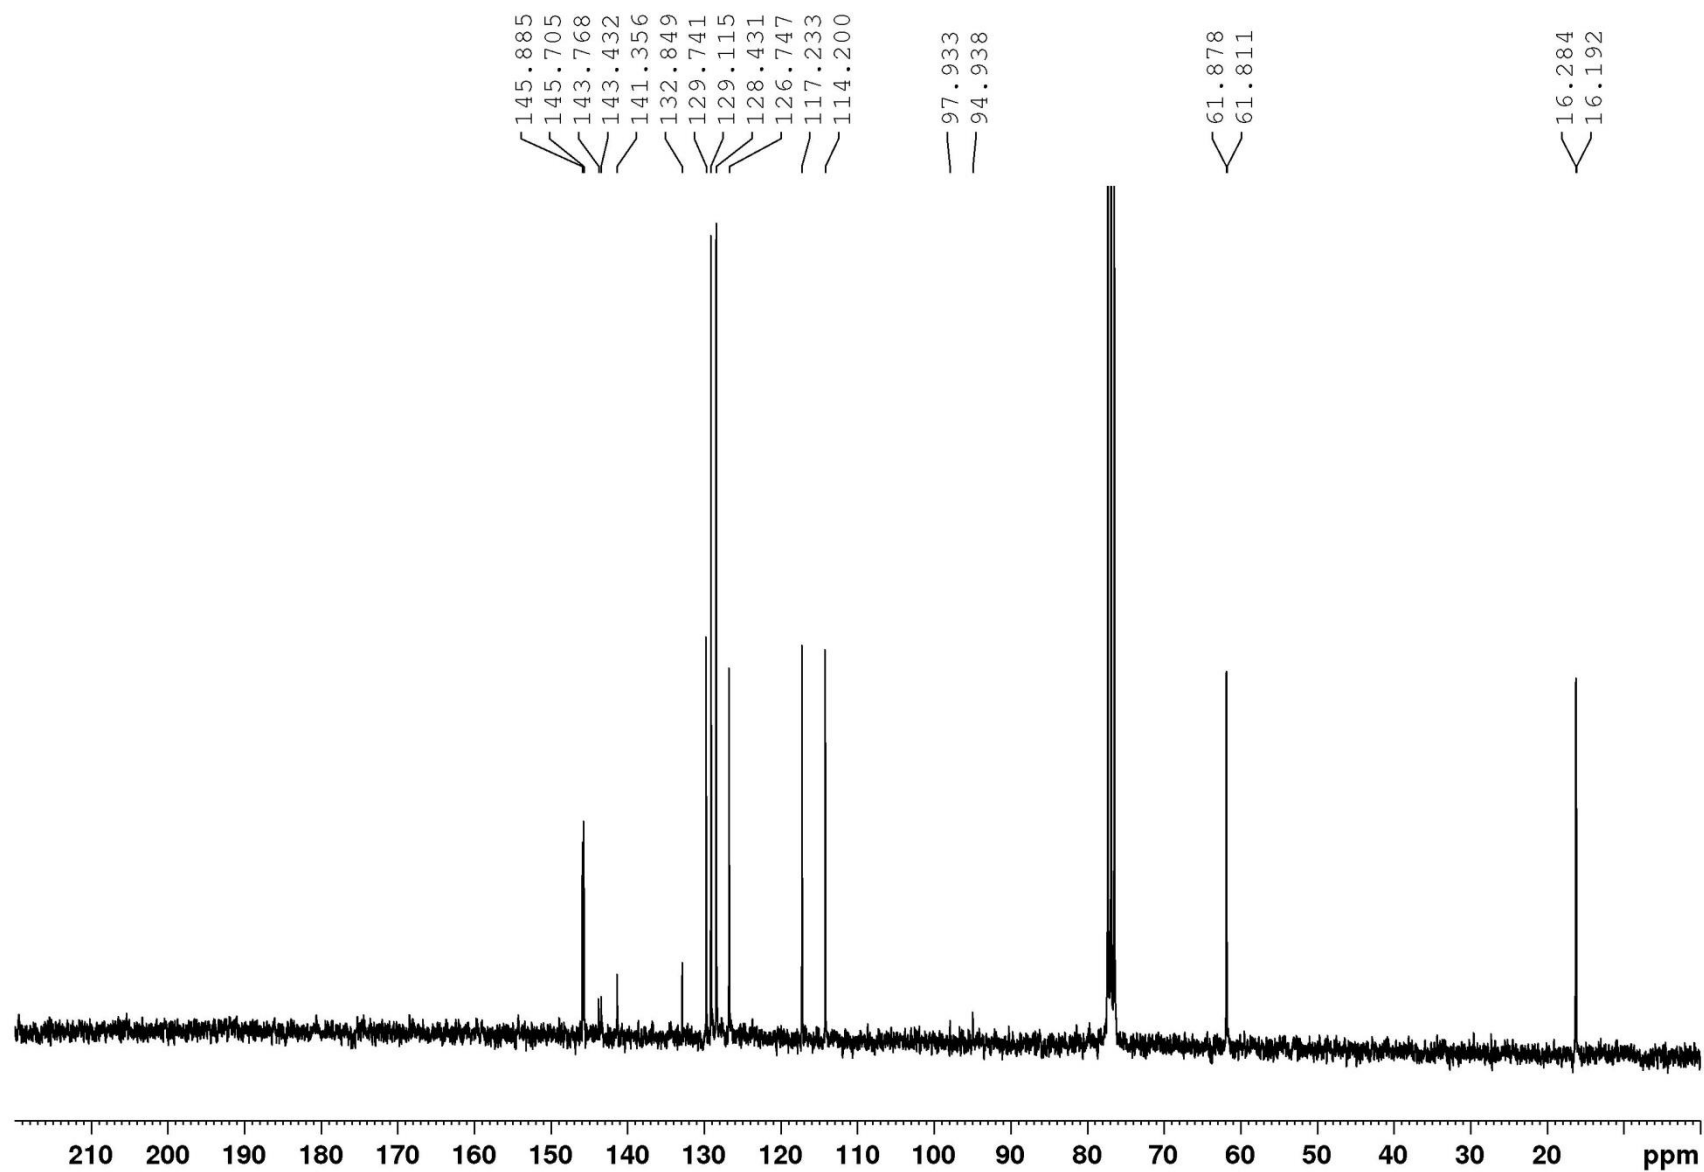

**Diethyl (7-phenylpyrazolo[1,5-a]pyridin-3-yl)phosphonate (5n)  $^{31}\text{P}$  NMR.**

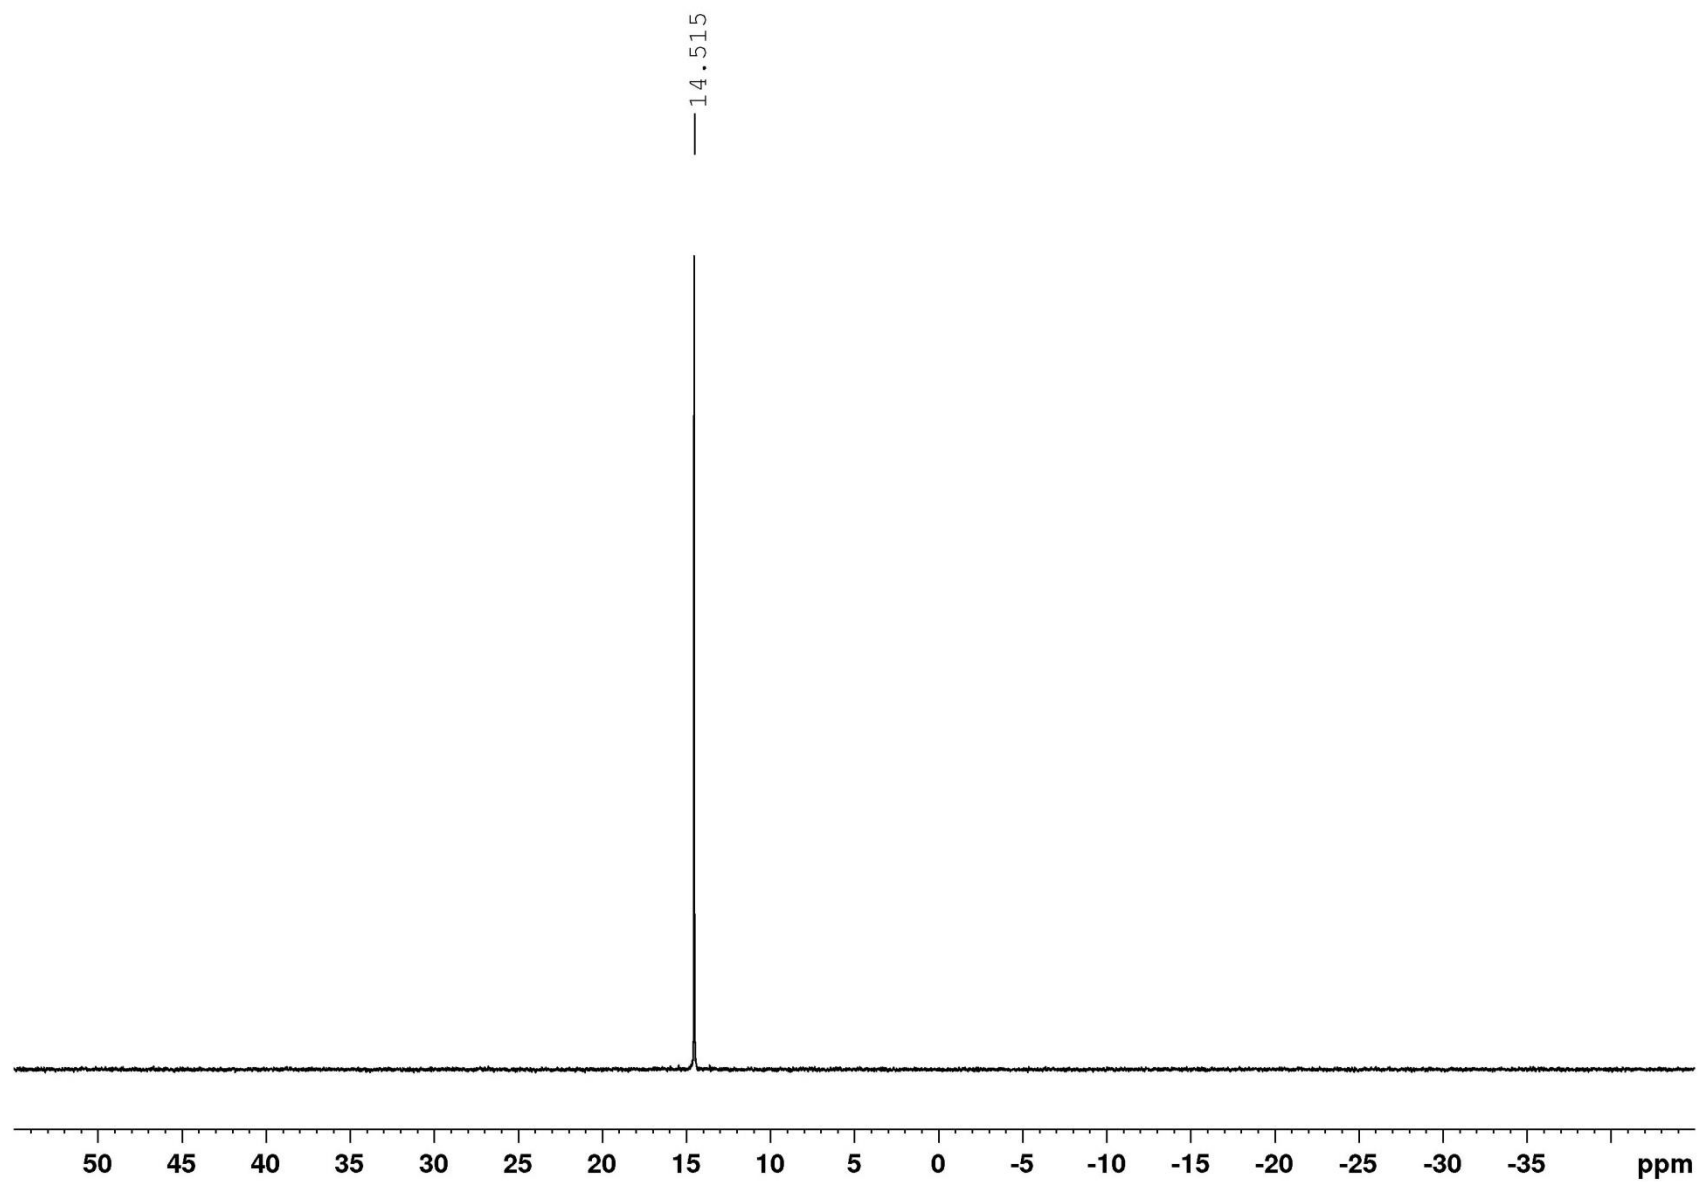

**Methyl 3-diethoxyphosphorylpyrazolo[1,5-a]pyridine-5-carboxylate (5o)  $^1\text{H}$  NMR.**

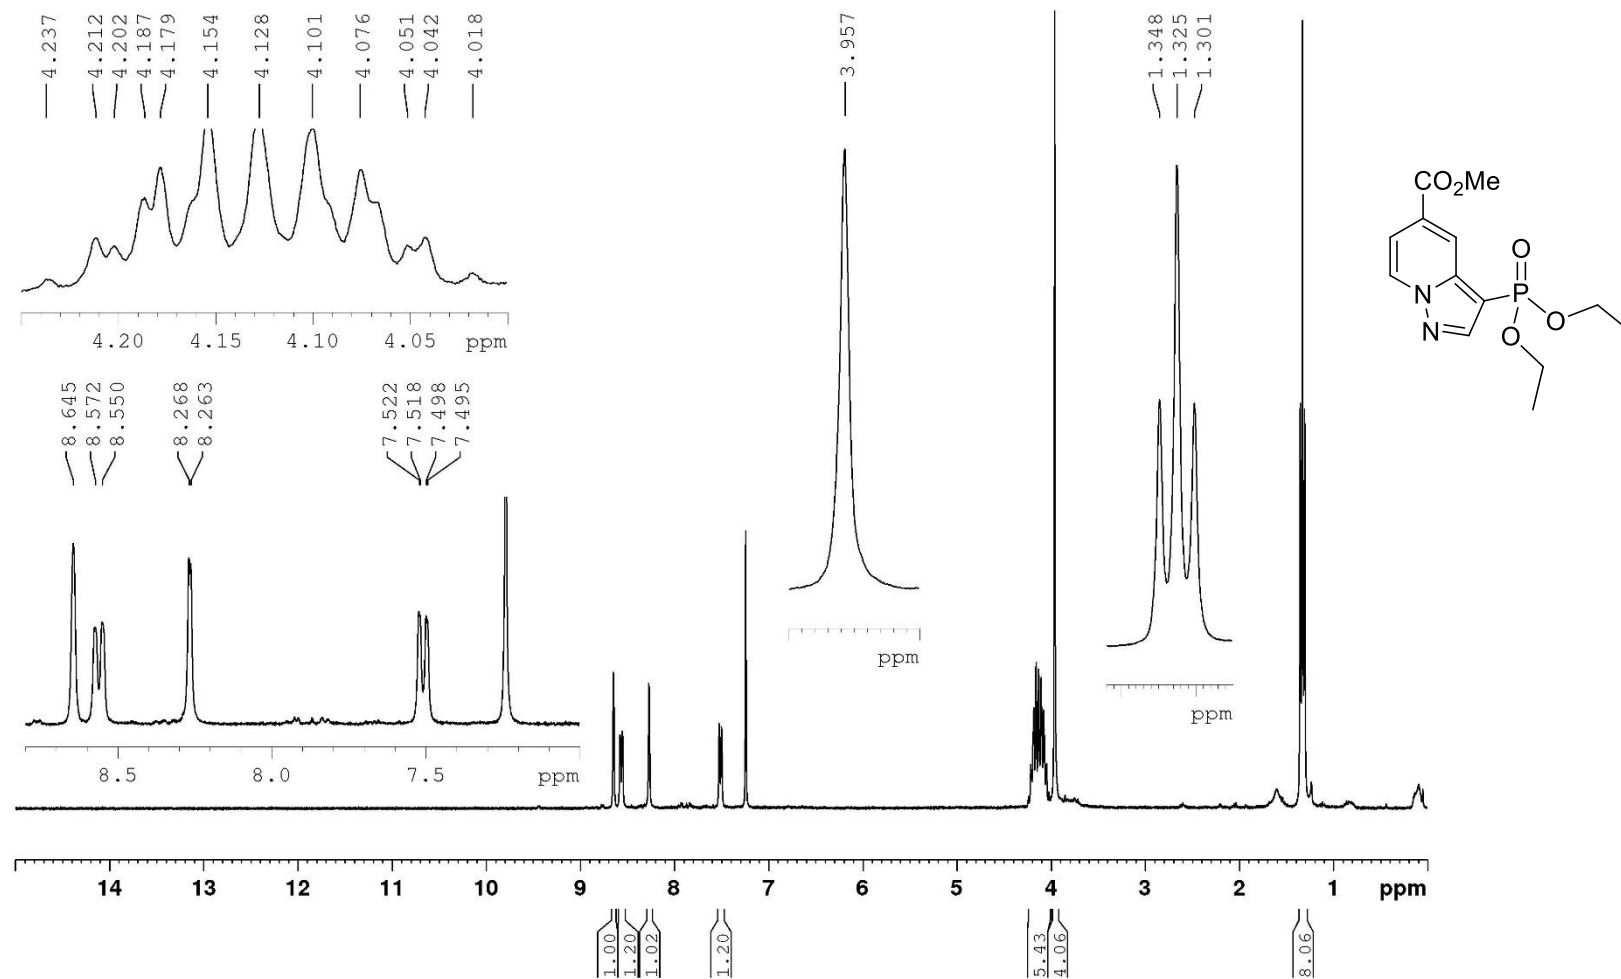

Methyl 3-diethoxyphosphorylpyrazolo[1,5-a]pyridine-5-carboxylate (5o)  $^{13}\text{C}$  NMR.

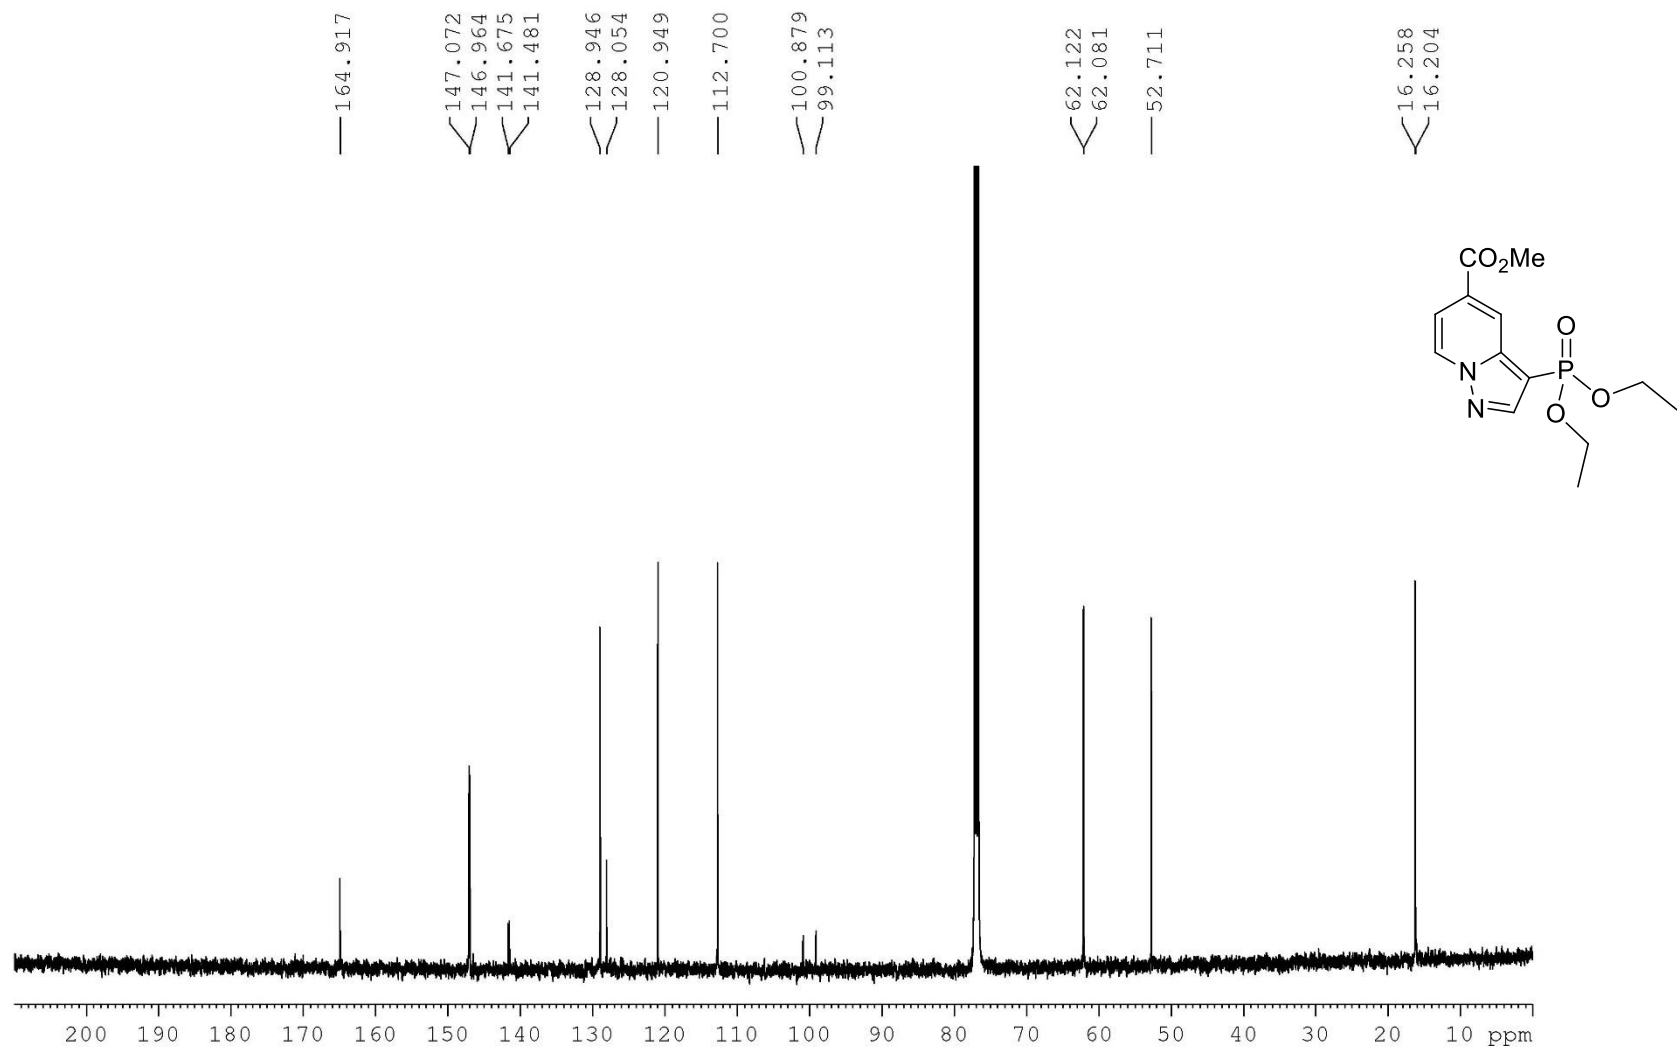



**Methyl 3-diethoxyphosphorylpyrazolo[1,5-a]pyridine-5-carboxylate (5o)  $^{31}\text{P}$  NMR.**

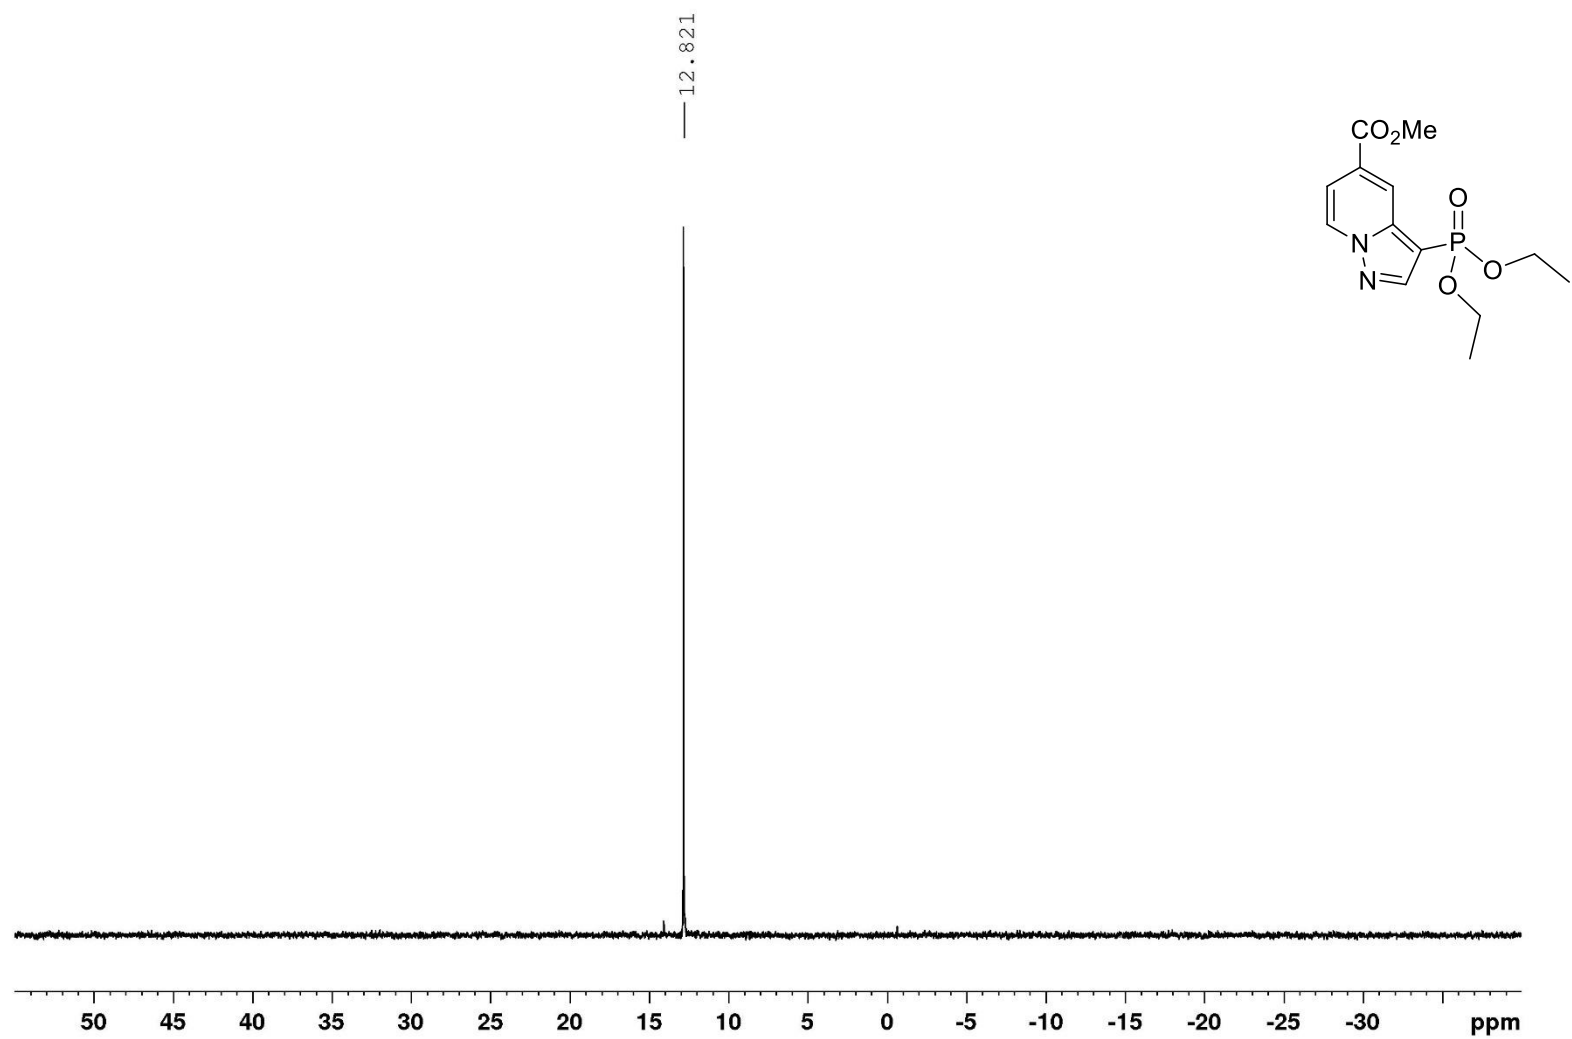

Diethyl (9-hydroxypyrazolo[1,5-a]quinoline-3-yl)phosphonate (5p)  $^1\text{H}$  NMR.

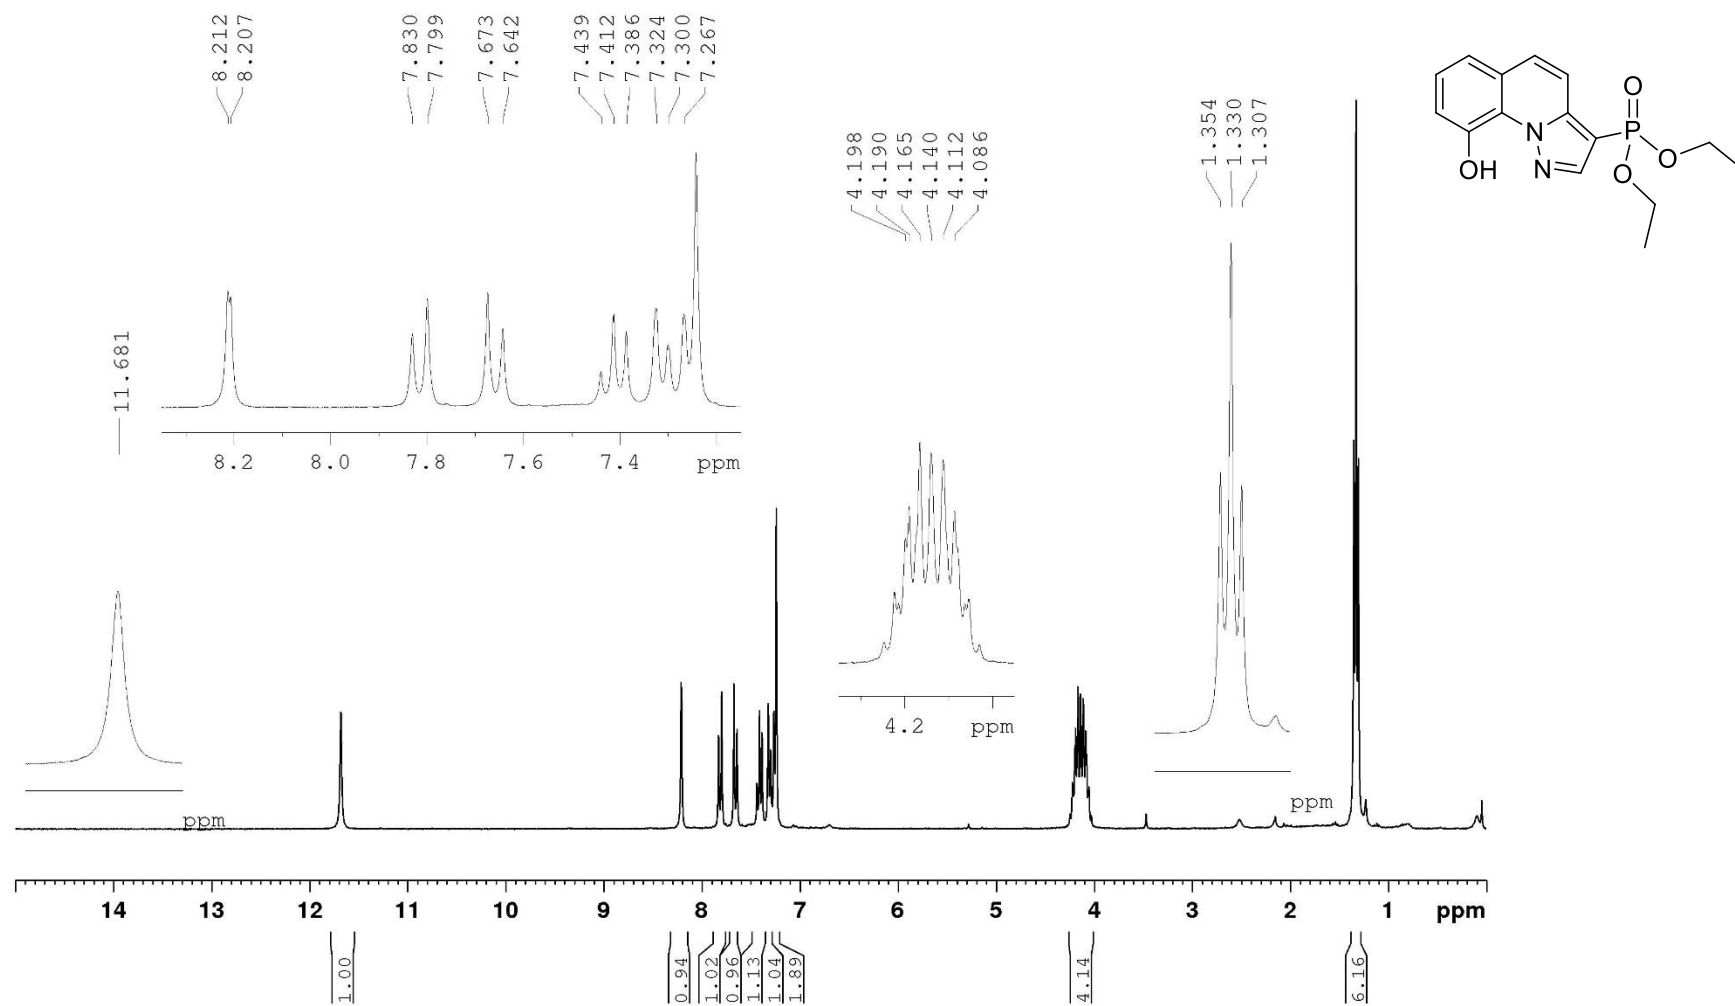

**Diethyl (9-hydroxypyrazolo[1,5-a]quinoline-3-yl)phosphonate (5p)  $^{13}\text{C}$  NMR.**

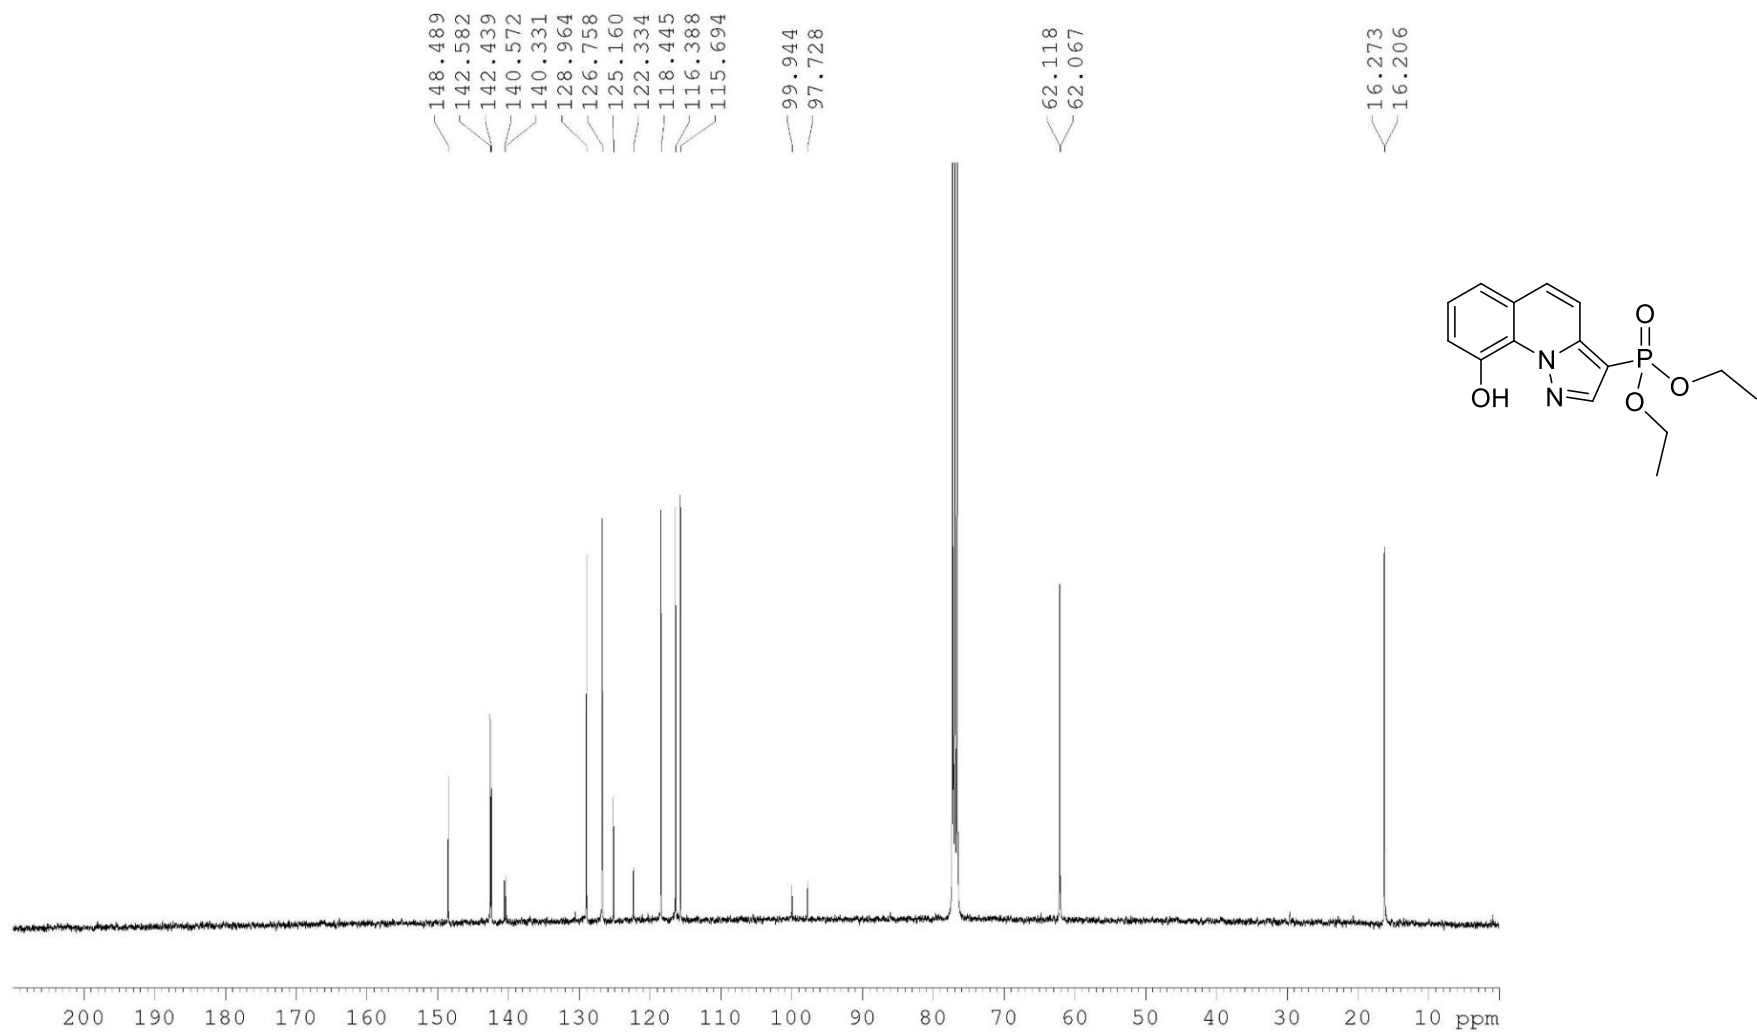

**Diethyl (9-hydroxypyrazolo[1,5-a]quinoline-3-yl)phosphonate (5p)  $^{31}\text{P}$  NMR.**

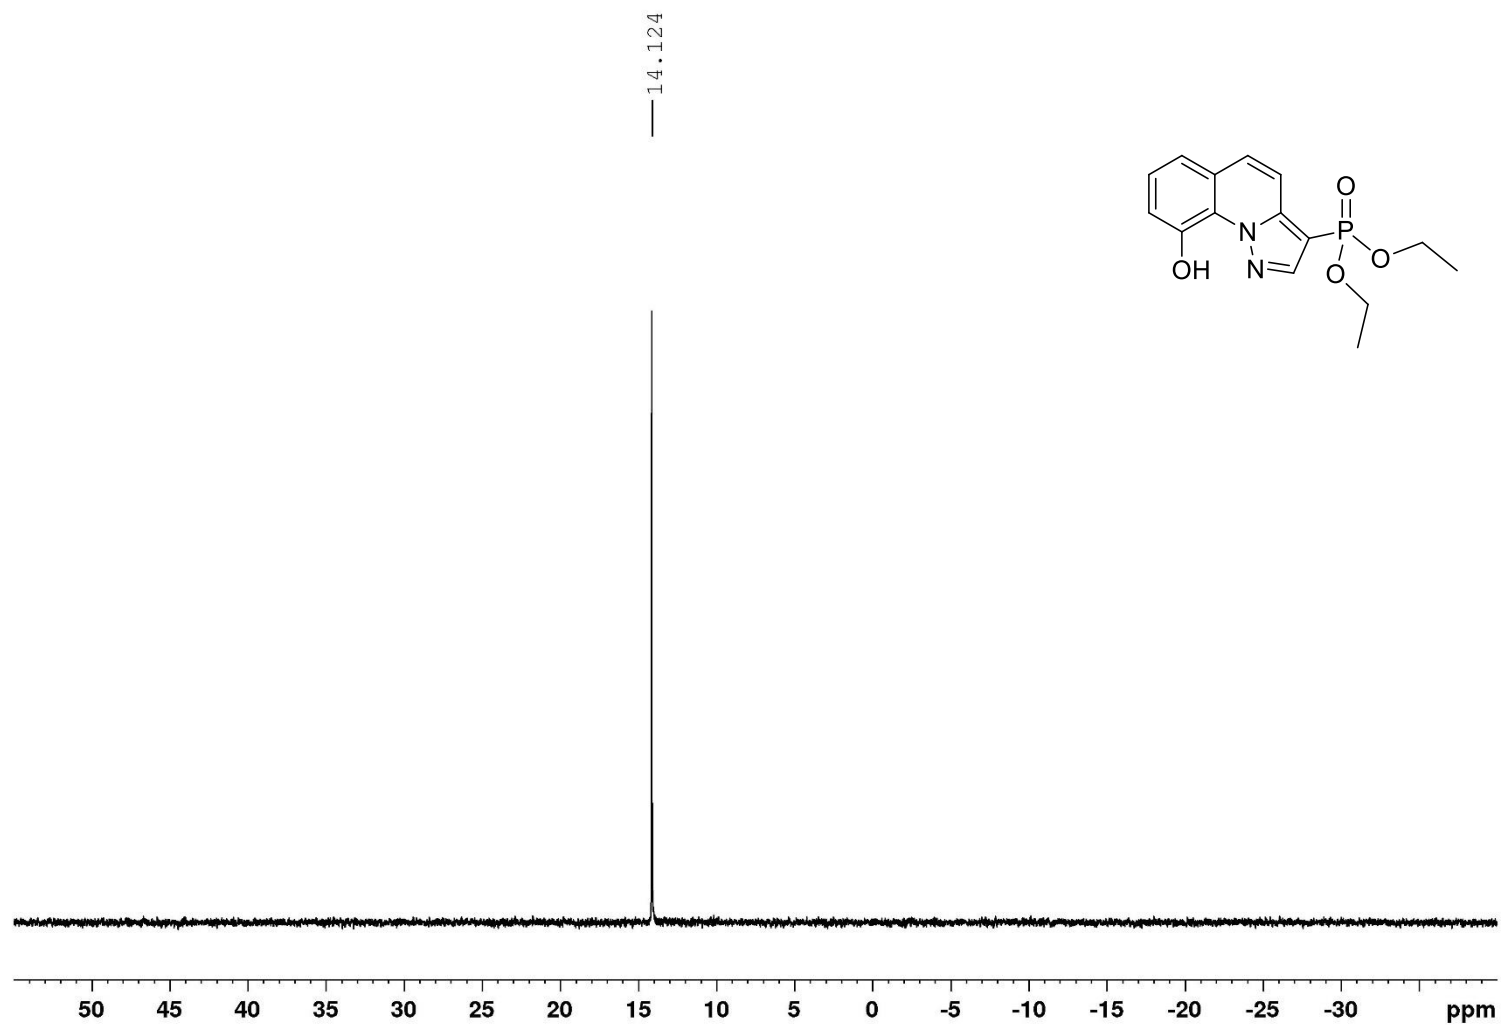

Diethyl (pyrazolo[1,5-a][1,10]phenantroline-3-yl)phosphonate (5q)  $^1\text{H}$  NMR.

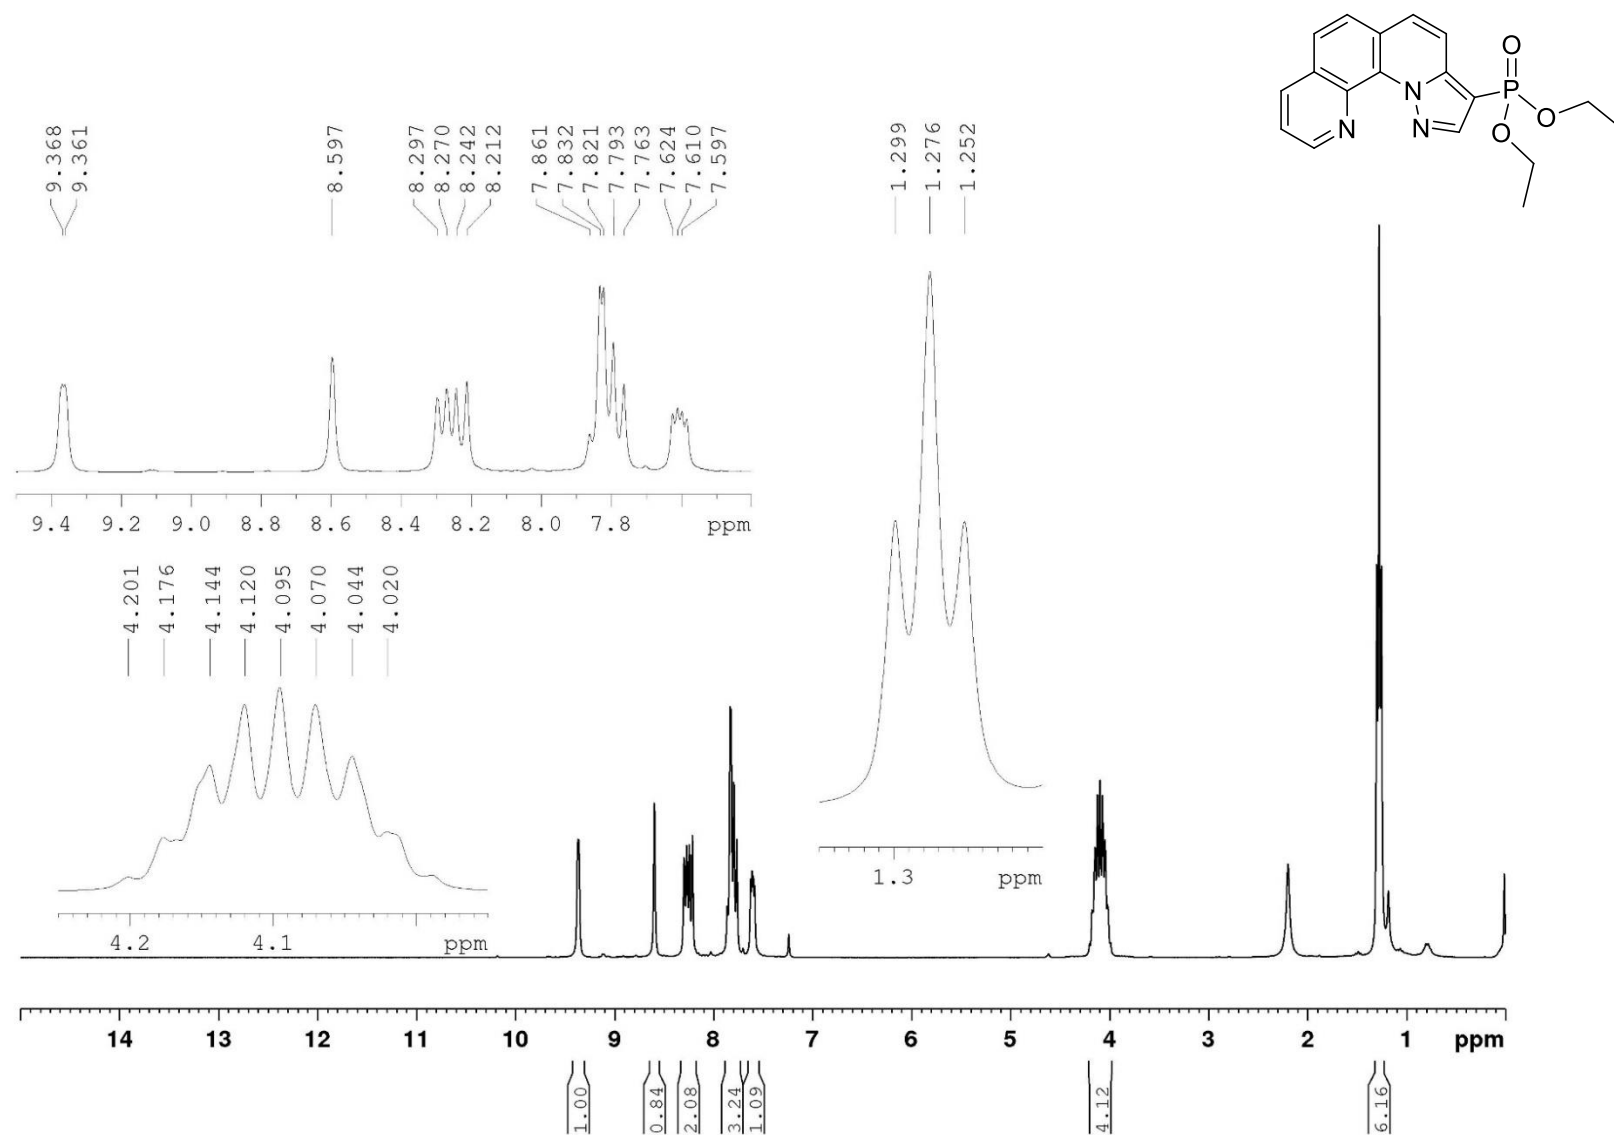

Diethyl (pyrazolo[1,5-a][1,10]phenantroline-3-yl)phosphonate (5q)  $^{13}\text{C}$  NMR.

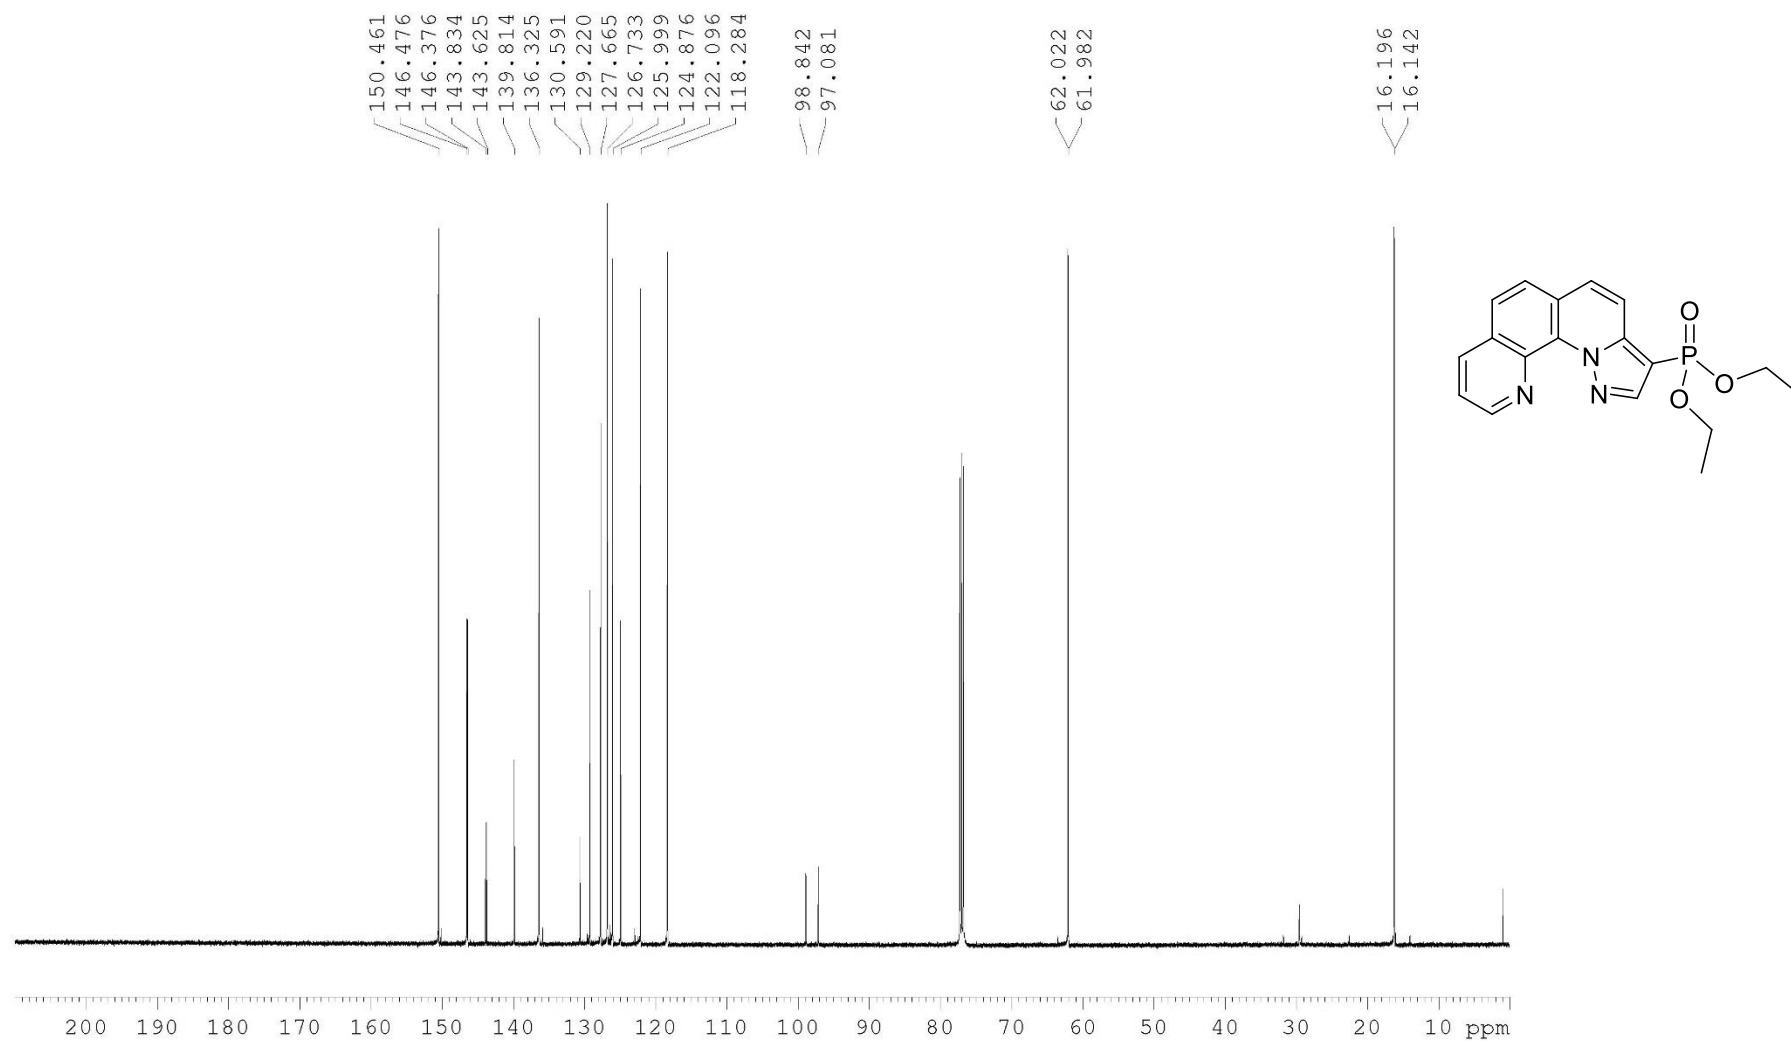

Diethyl (pyrazolo[1,5-a][1,10]phenantroline-3-yl)phosphonate (5q)  $^{31}\text{P}$  NMR.

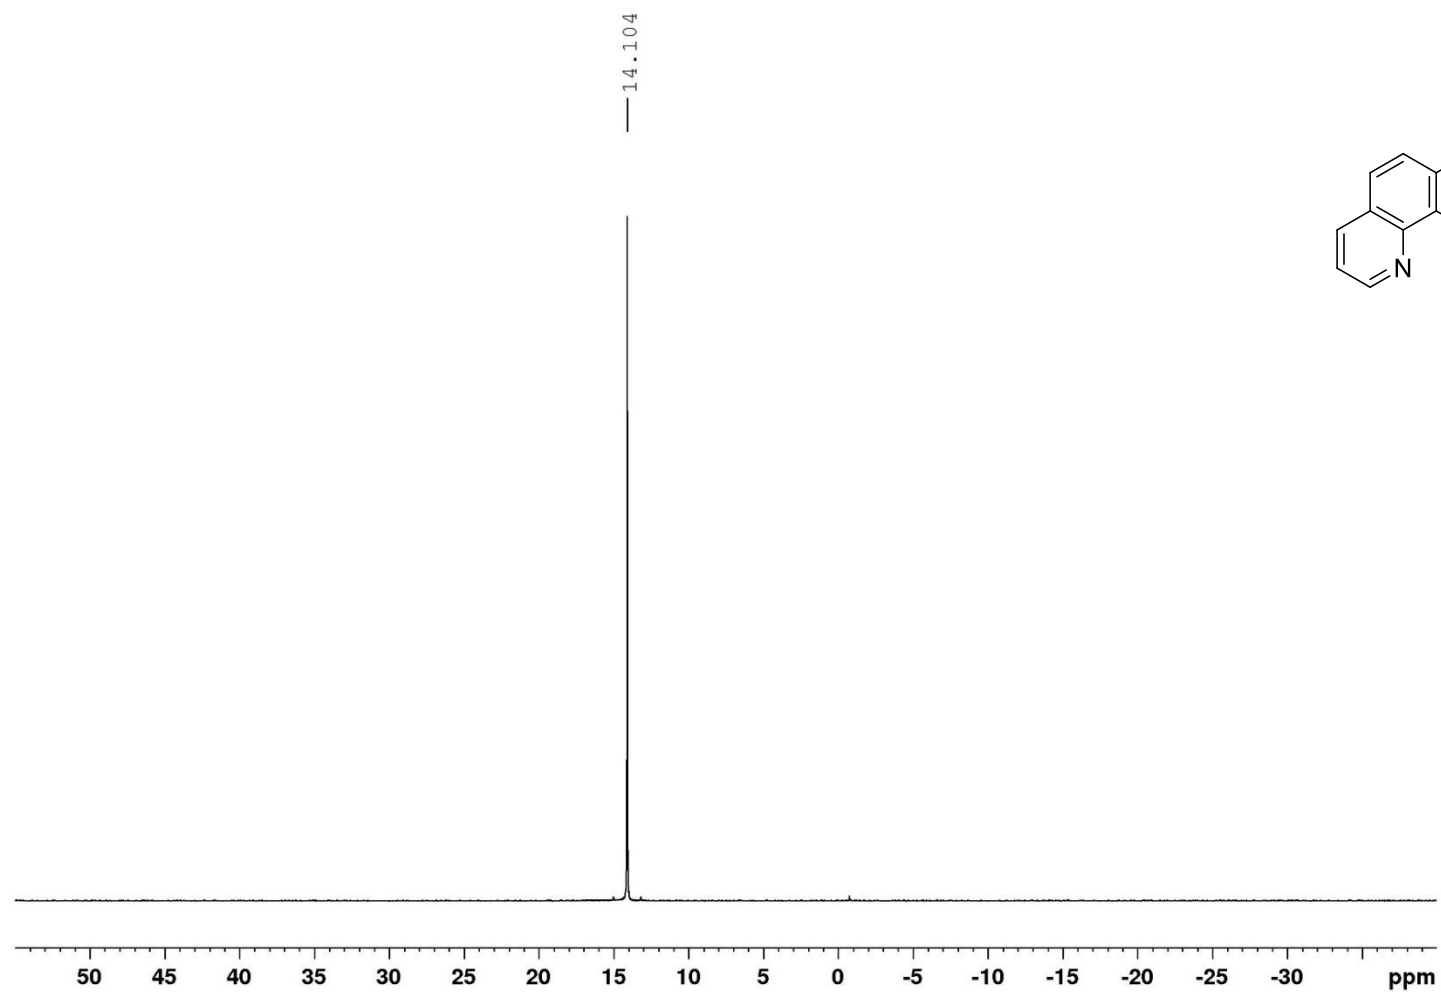

**Diethyl (2-chloro[1,5-a]pyridin-3-yl)phosphonate <sup>1</sup>H NMR(5r).**

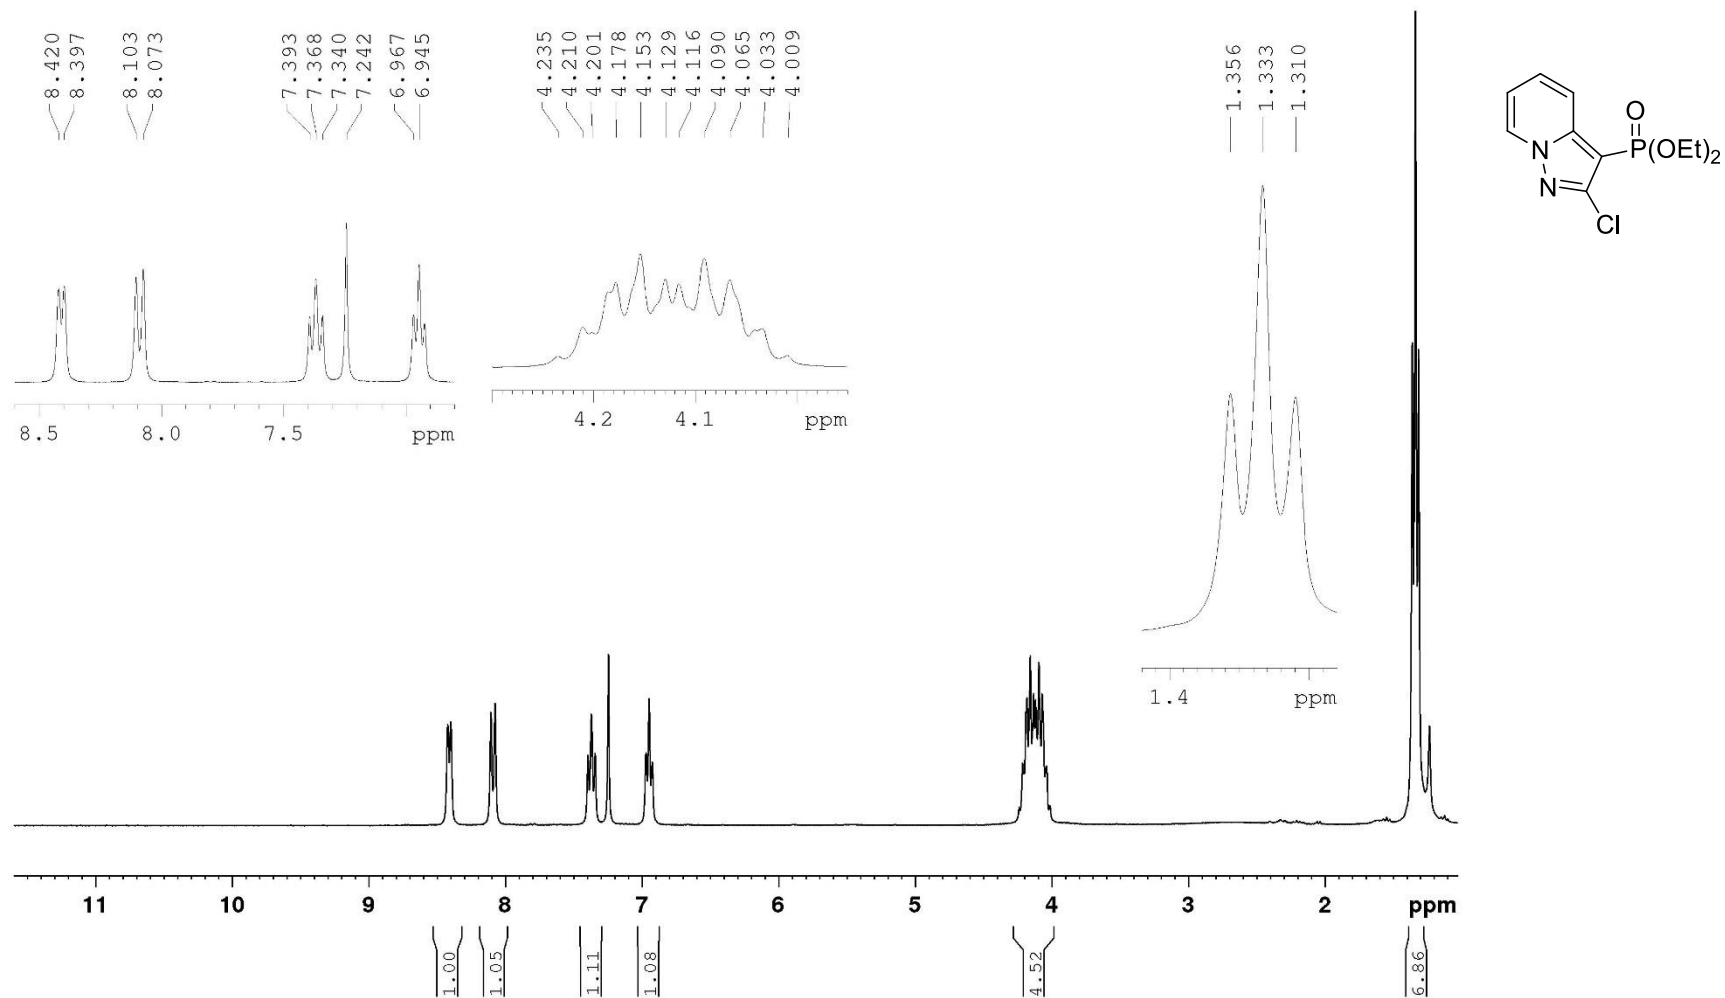

**Diethyl (2-chloro[1,5-a]pyridin-3-yl)phosphonate <sup>13</sup>C NMR(5r).**



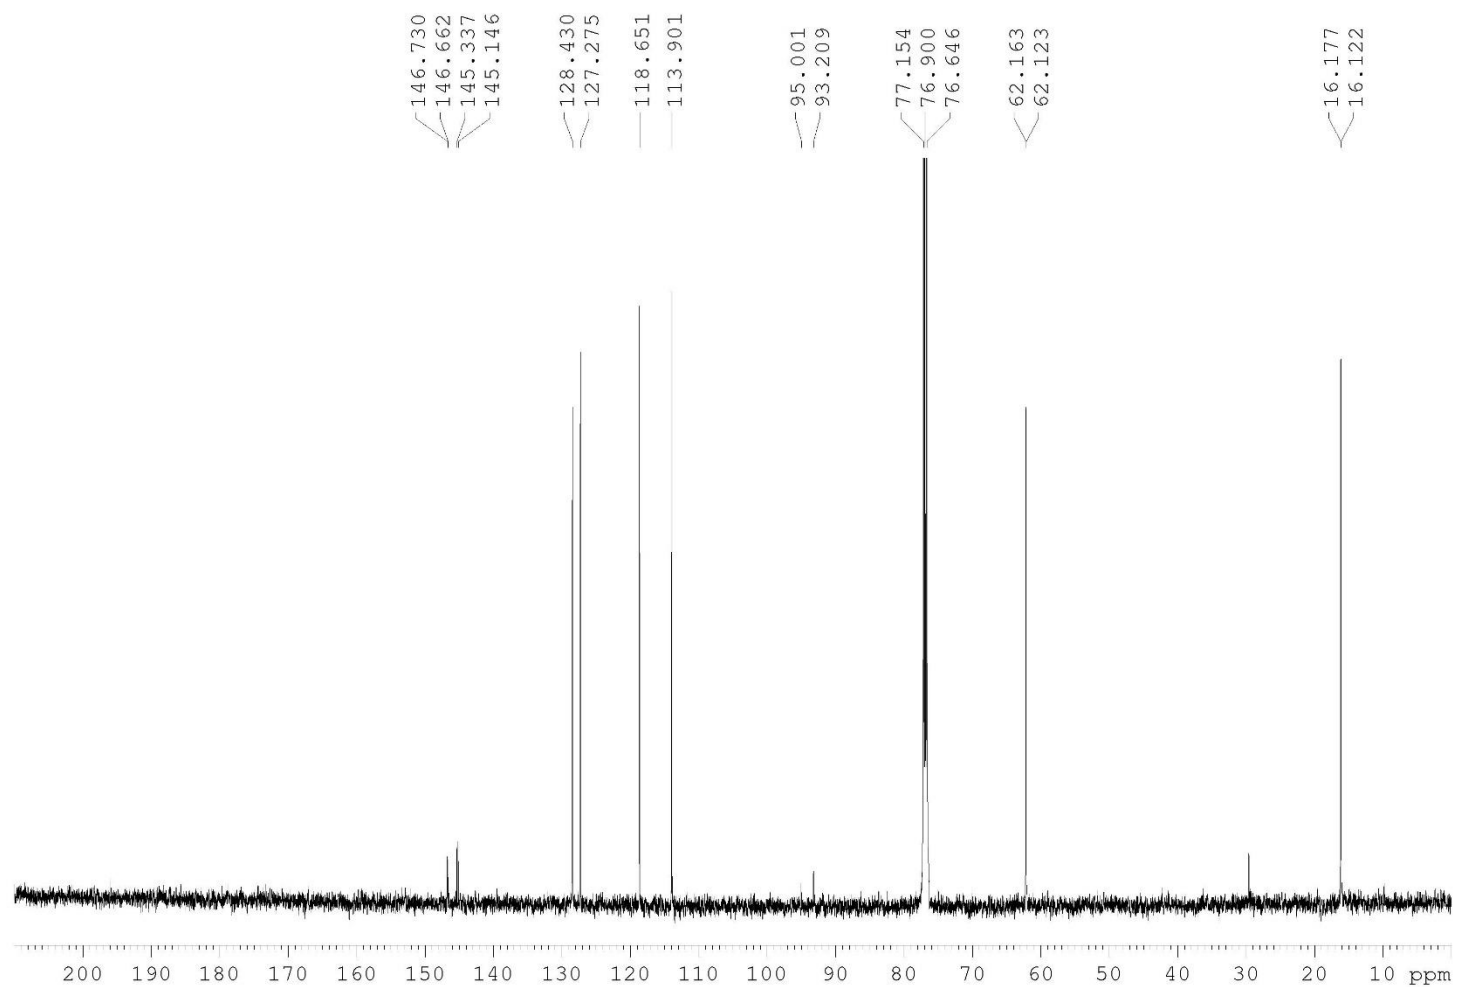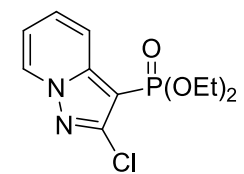

Diethyl (2-chloro[1,5-a]pyridin-3-yl)phosphonate  $^{31}\text{P}$  NMR(5r).

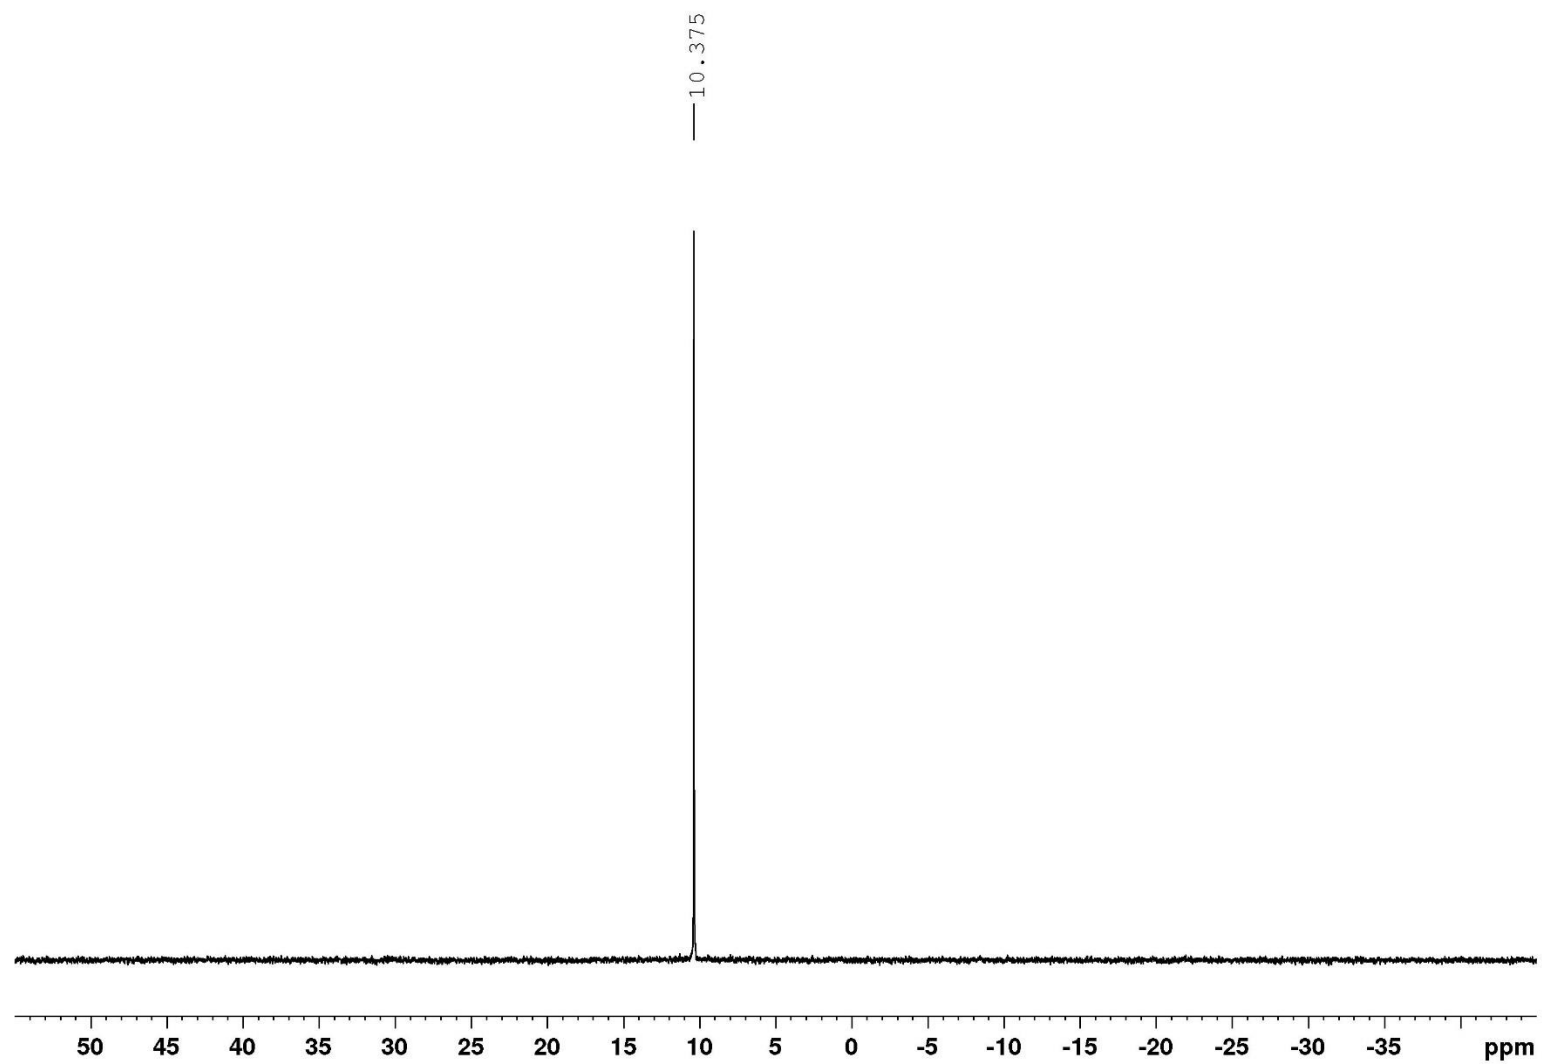

**$^{31}\text{P}$  NMR spectrum of reaction mixture for diethyl (2-bromo[1,5-a]pyridin-3-yl)phosphonate (5s) preparation.**

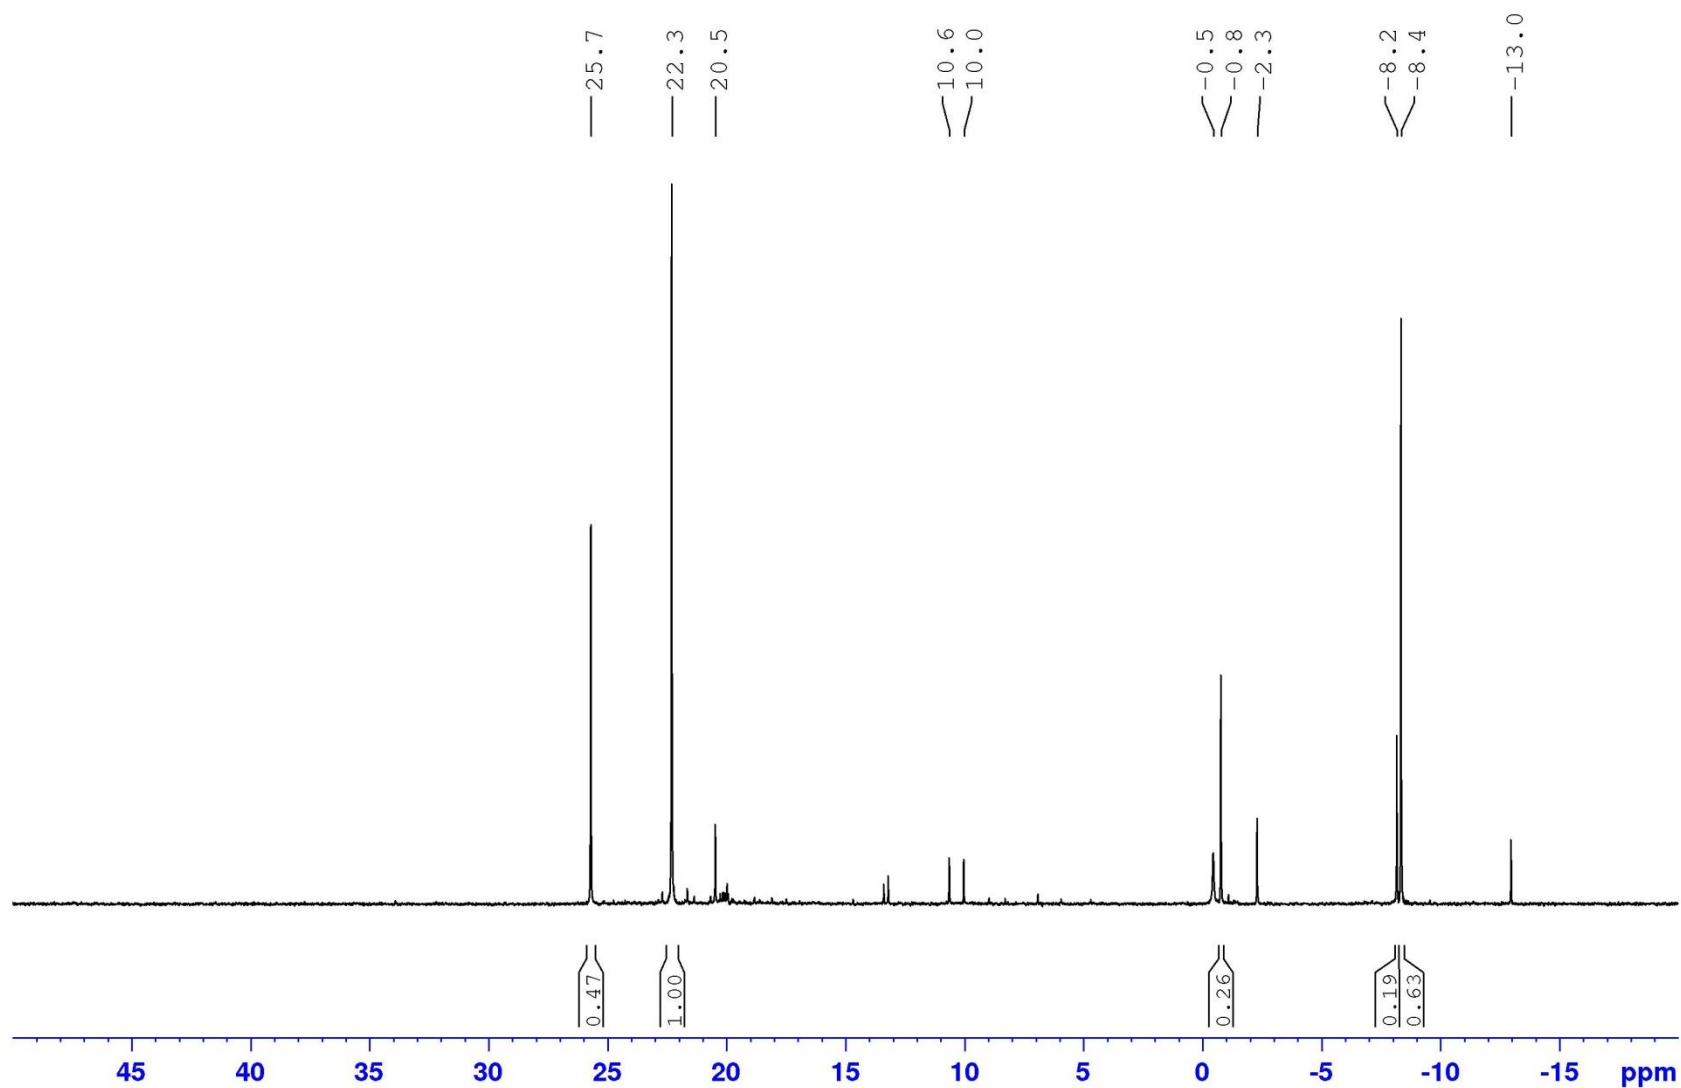

**Diethyl (2-iodo[1,5-a]pyridin-3-yl)phosphonate  $^1\text{H}$  NMR(5t).**

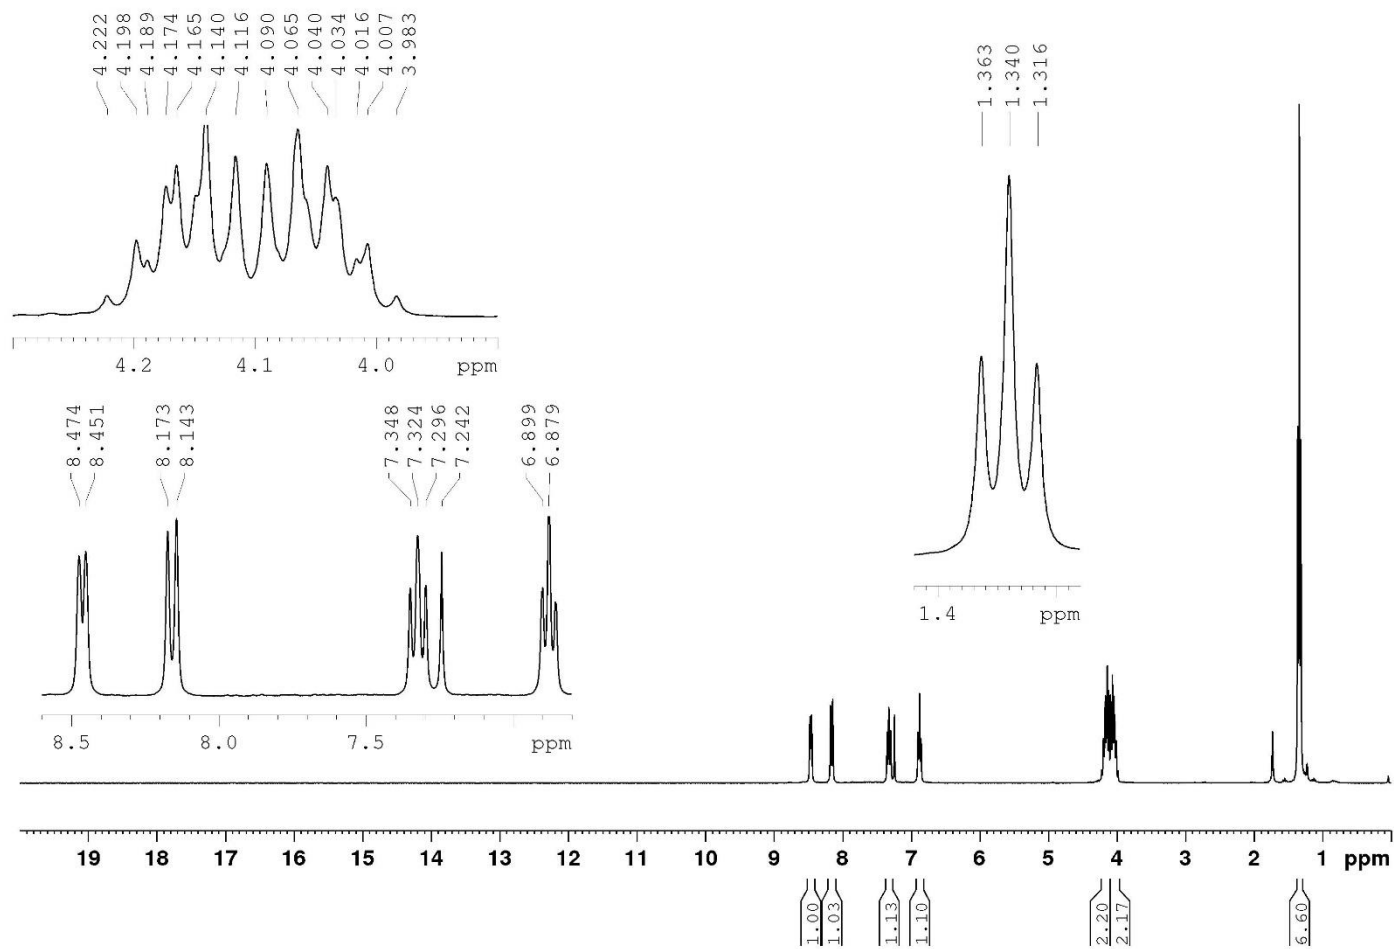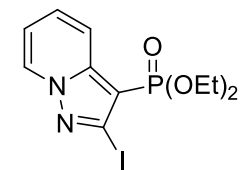

**Diethyl (2-iodo[1,5-a]pyridin-3-yl)phosphonate  $^{13}\text{C}$  NMR(5t).**

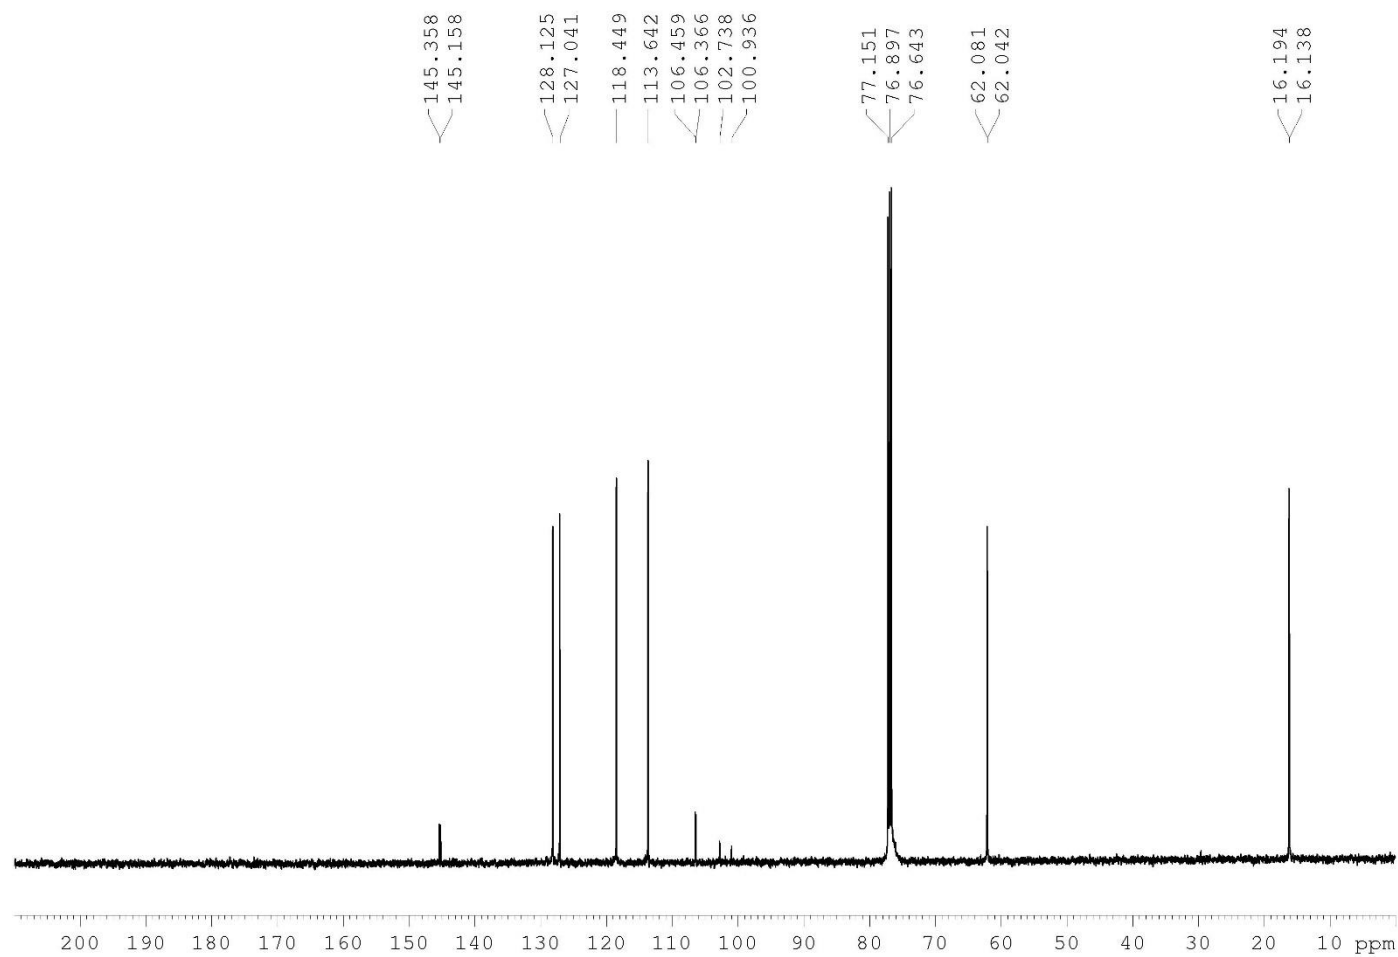

Diethyl (2-iodo[1,5-a]pyridin-3-yl)phosphonate  $^{31}\text{P}$  NMR(5t).

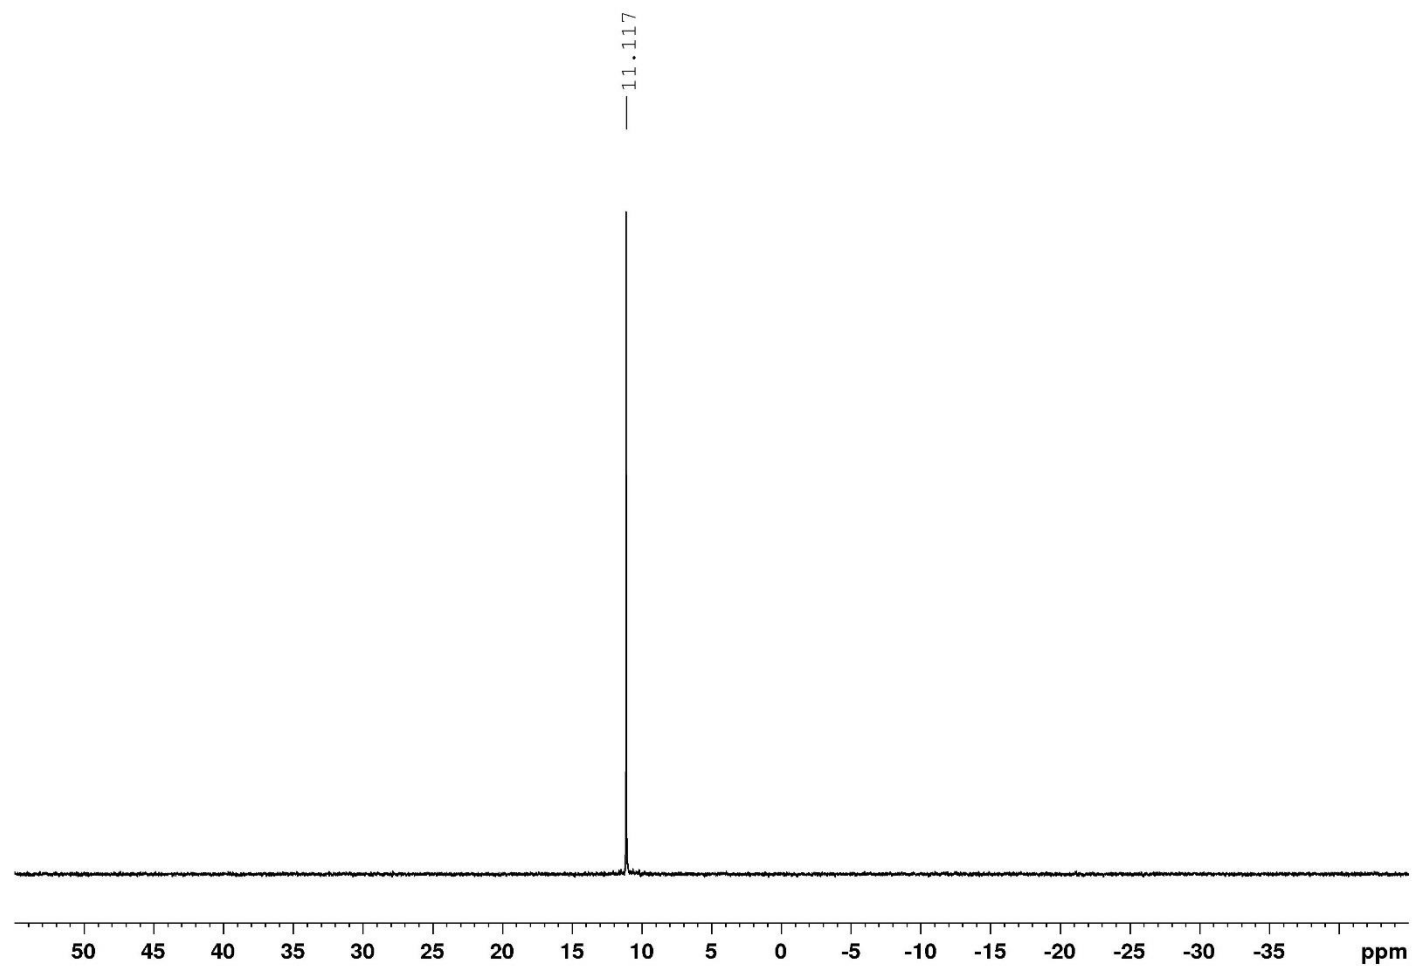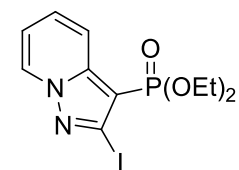

**Diethyl (2-phenoxy[1,5-a]pyridin-3-yl)phosphonate <sup>1</sup>H NMR(5u).**

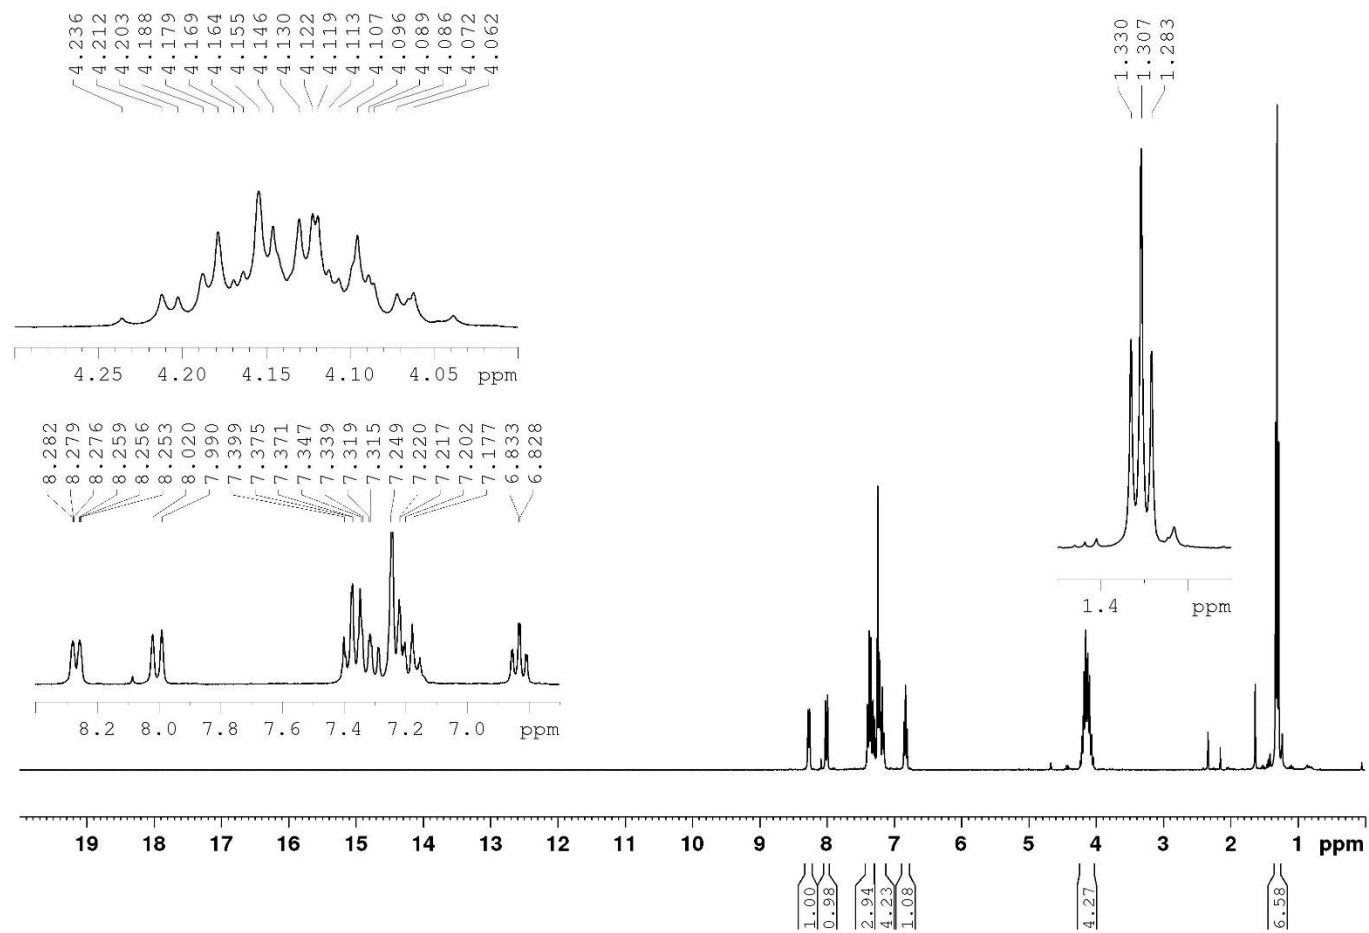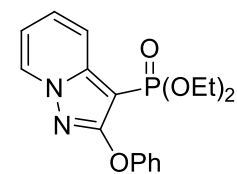

**Diethyl (2-phenoxy[1,5-a]pyridin-3-yl)phosphonate <sup>13</sup>C NMR(5u).**

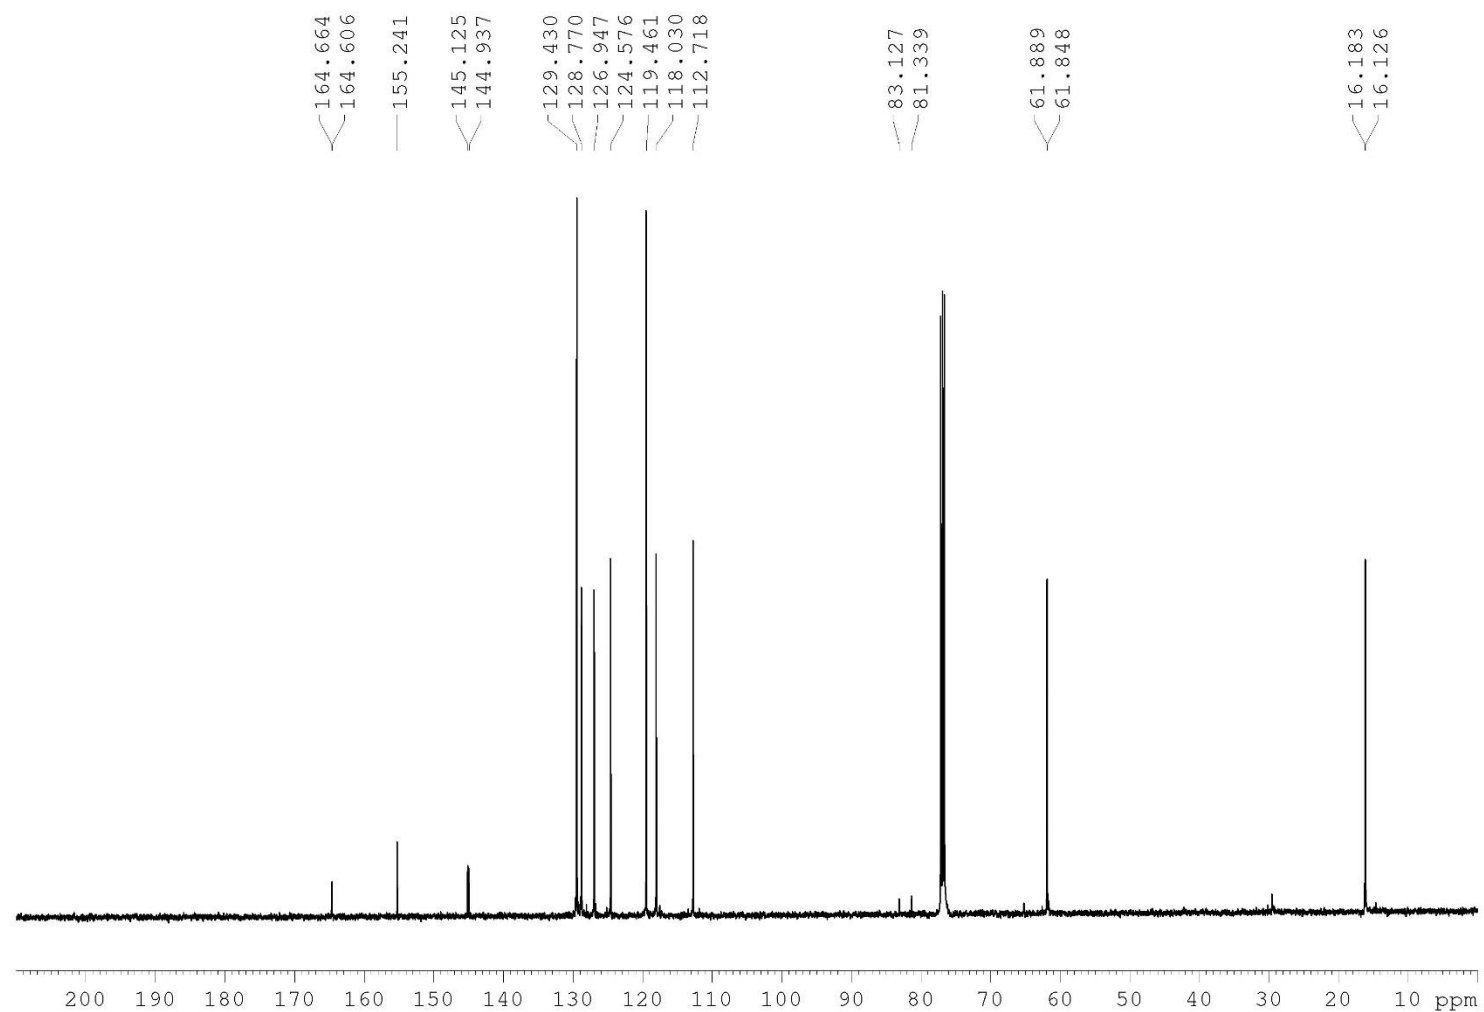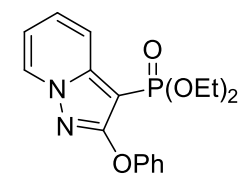



Diethyl (2-phenoxy[1,5-a]pyridin-3-yl)phosphonate  $^{31}\text{P}$  NMR(5u).

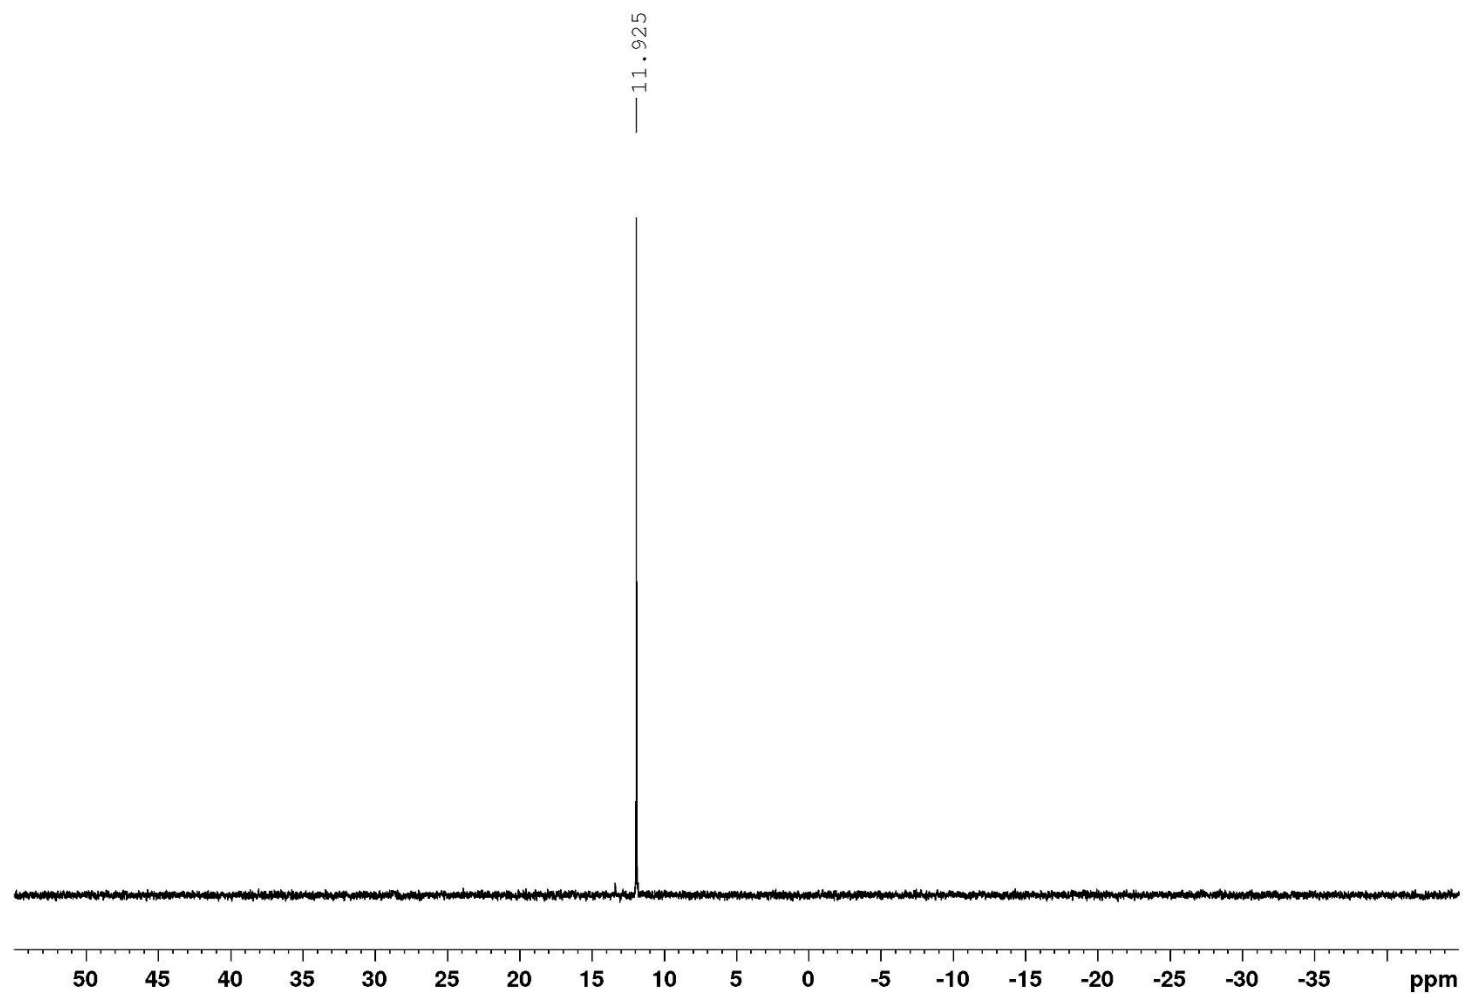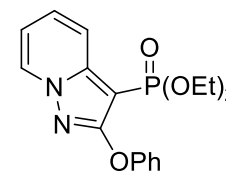

Supplement: s1 [file s1]
